# Supplementary material for: Genome resequencing reveals demographic history and genetic architecture of seed salinity tolerance in Populus euphratica
Source: PubMed Central journal article supplement (PMC7475257; doi:10.1093/jxb/eraa172), 2020-04-03
Supplement: eraa172_suppl_supplementary_figures_s1-s12_table_s1-s16.pdf [file eraa172_suppl_supplementary_figures_s1-s12_table_s1-s16.pdf]

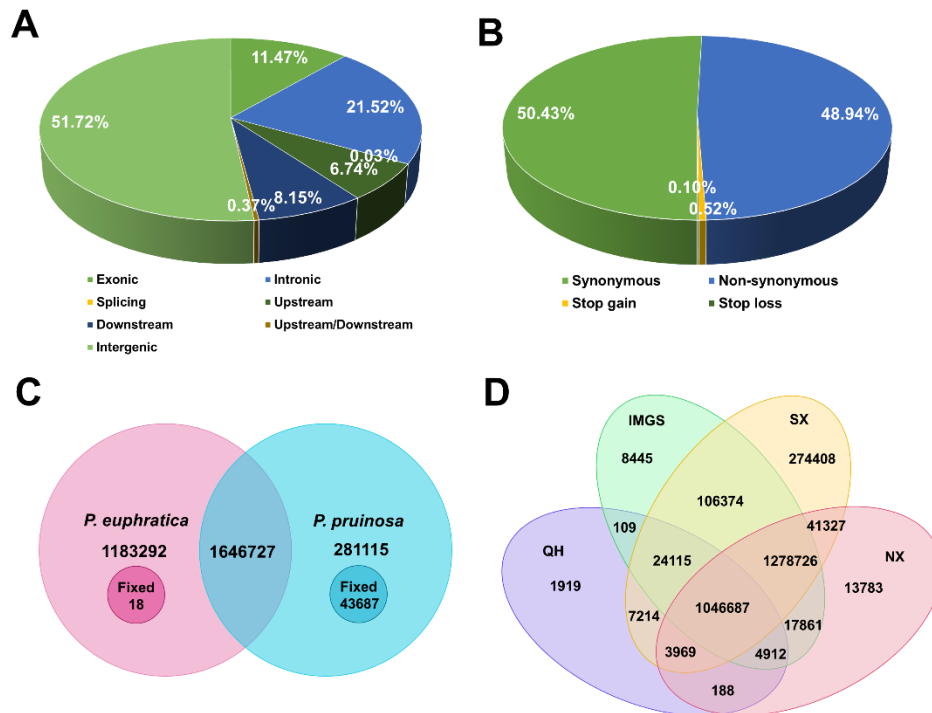

**Supplemental Fig. S1** Summary of the quantity of SNPs. (a) Pie chart summarizing the proportion of 3,154,839 SNPs in each category of the *P. euphratica* reference genome. (b) Distribution of SNPs and their mutation types in the exonic regions. (c) Venn diagram summarizing the quantity of fixed, shared, and exclusive SNPs of the two species *P. euphratica* and *P. pruinosa*. (d) Venn diagram summarizing the quantity of shared and exclusive SNPs of the four sub-populations including southern Xinjiang (SX), northern Xinjiang (NX), Inner Mongolia and Gansu (IMGS) and Qinghai (QH) of *P. euphratica*. The fixed polymorphism in each sub-population is zero.

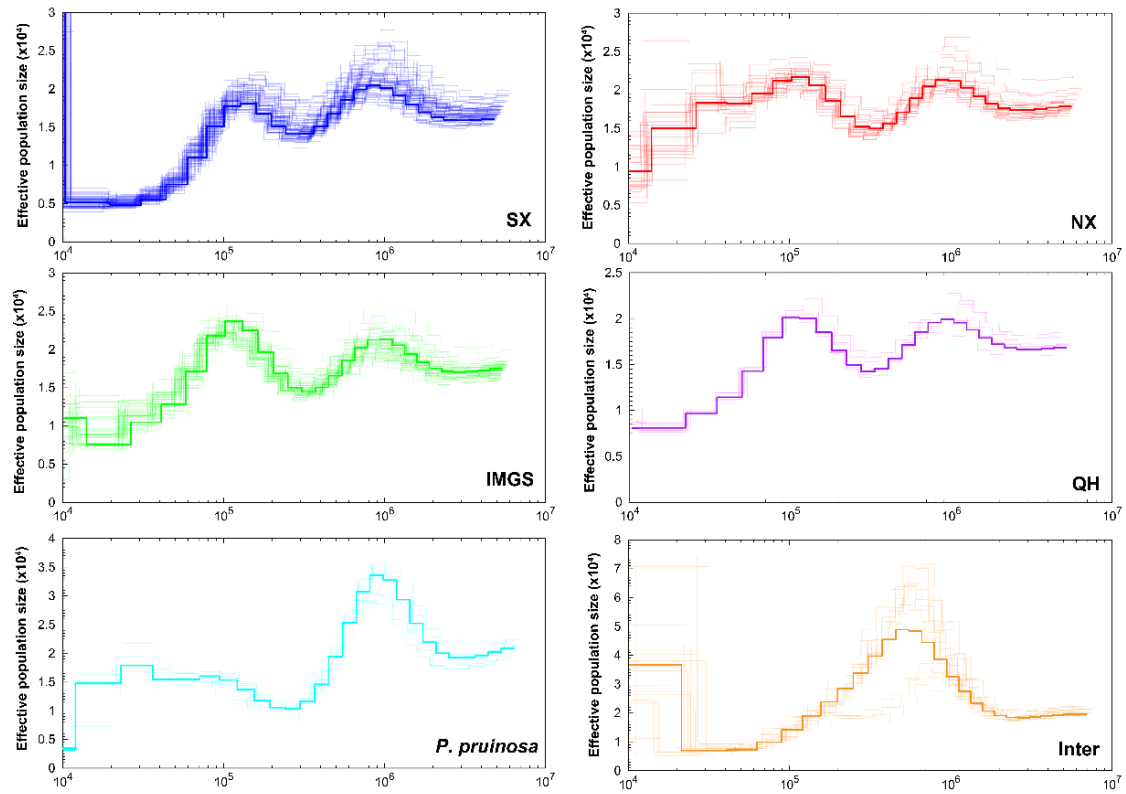

**Supplemental Fig. S2** Changes in effective population size ( $N_e$ ) through time inferred by PSMC for the four clusters of *P. euphratica* (SX, NX, IMGS and QH), *P. pruinosa*, and the intermediate cluster. The fine lines represent single individuals, and the bold lines represent the average values.

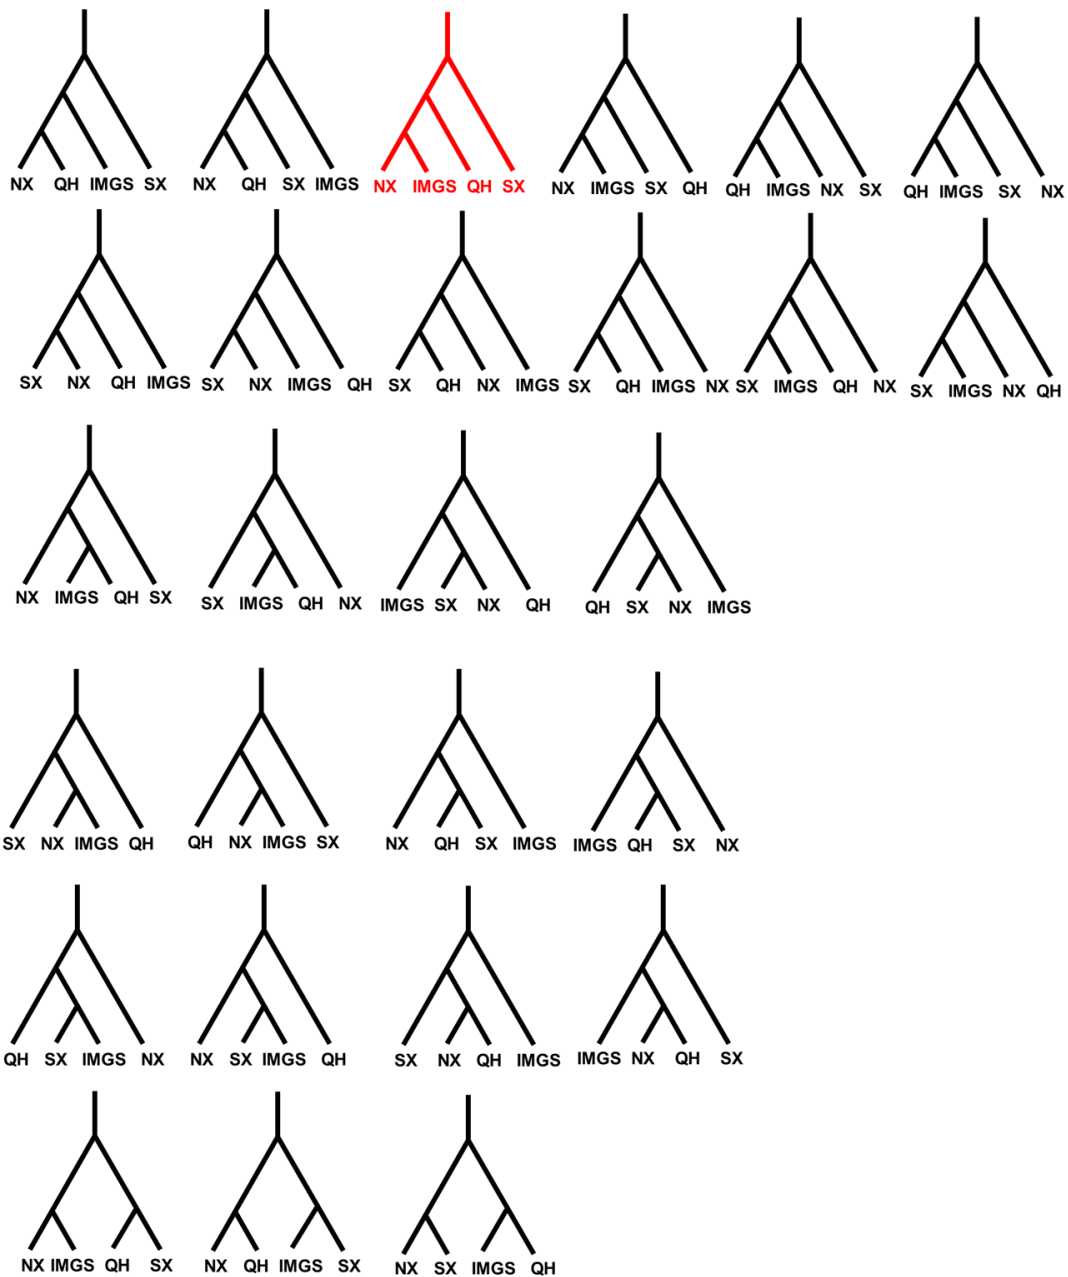

**Supplemental Fig. S3** Schematic diagram of all possible topological structures of the four clusters of *P. euphratica* used in *fastsimcoal2* to infer demographic parameters. For each topological structure, the parameters of gene flow, divergence time and effective population sizes are flexible. We perform parameter estimation for 100 independent runs and choose the model with the highest likelihood.

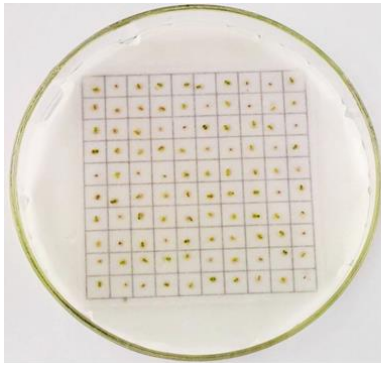

NaCl (0mmol/L)

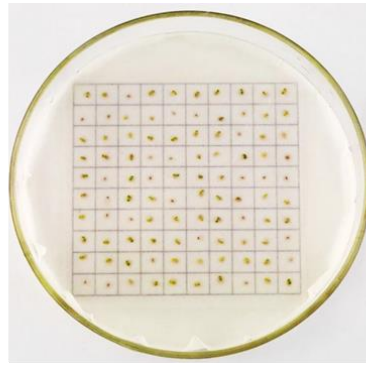

NaCl (50mmol/L)

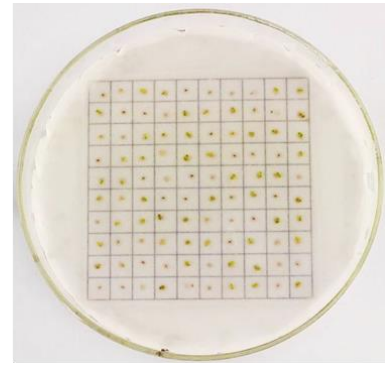

NaCl (100mmol/L)

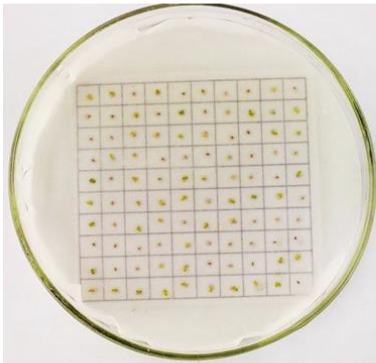

NaCl (150mmol/L)

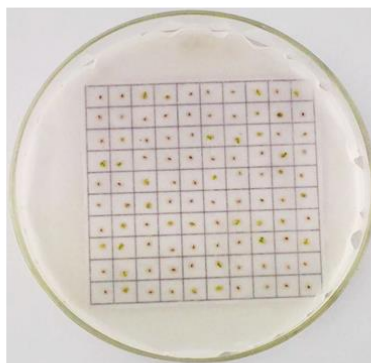

NaCl (200mmol/L)

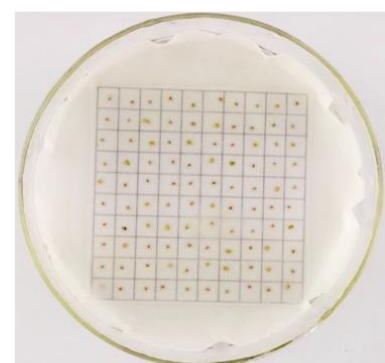

NaCl (250mmol/L)

**Supplemental Fig. S4** The experiment of seed salinity tolerance. The germination rates of 100 seeds of 210 half-sib families under different NaCl concentrations (0 mmol/L, 50 mmol/L, 100 mmol/L, 150 mmol/L, 200 mmol/L and 250 mmol/L) are counted after three days of culture. Three biological replicates are performed.

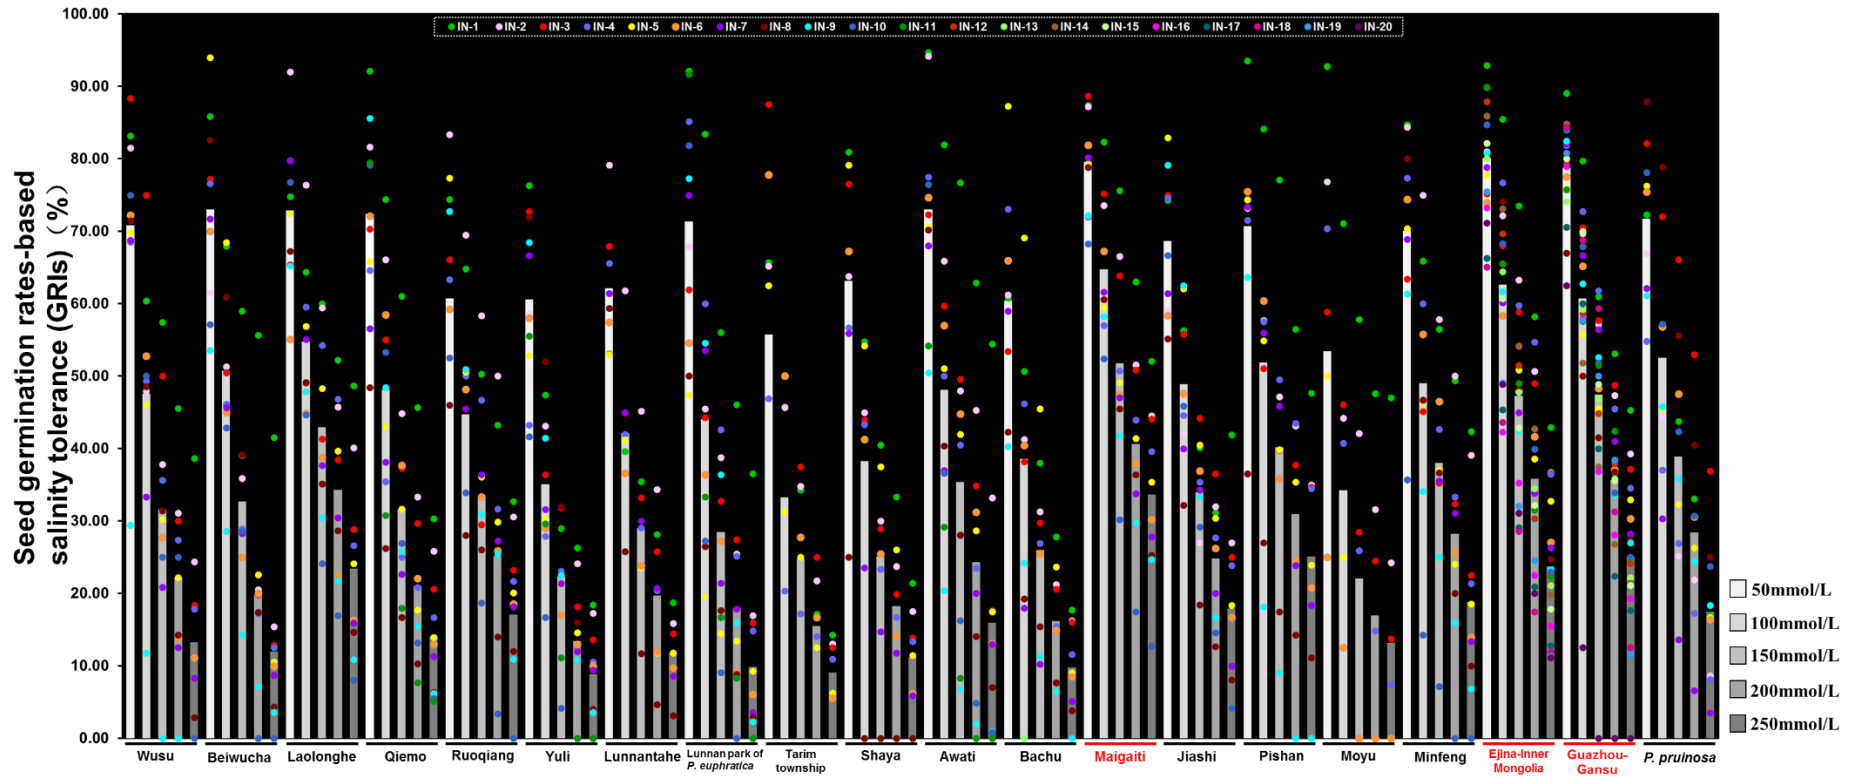

**Supplemental Fig. S5** Seed salinity tolerance of 19 *P. euphratica* populations and one *P. pruinosa* population. To minimize the differences in basal germination rate of each individual, the seed germination rate-based salinity tolerance indexes [ratio of germination rates between NaCl conditions (50 mmol/L, 100 mmol/L, 150 mmol/L, 200 mmol/L, 250 mmol/L) and control conditions (0 mmol/L), GRIs] are used to measure the seed salinity tolerance. Each colored dot represents each individual, and the values of the histograms represent the means of all individuals in each population.

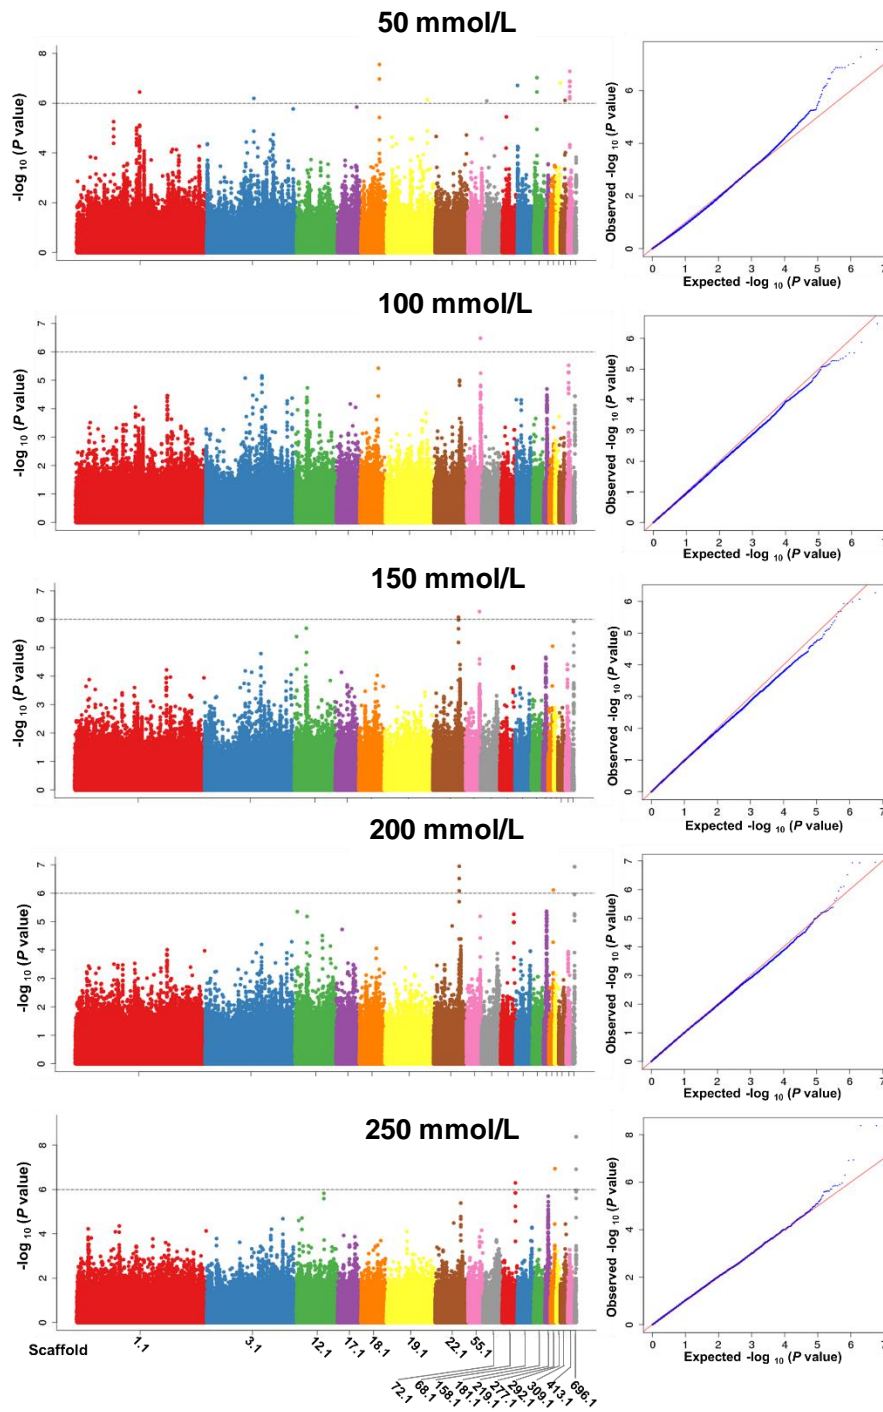

**Supplemental Fig. S6** Manhattan plots and quantile-quantile (Q-Q) plots for GWAS of the GRIs under five NaCl concentration gradients using the first group that includes all 210 individuals (Peu & Im & Ppr).

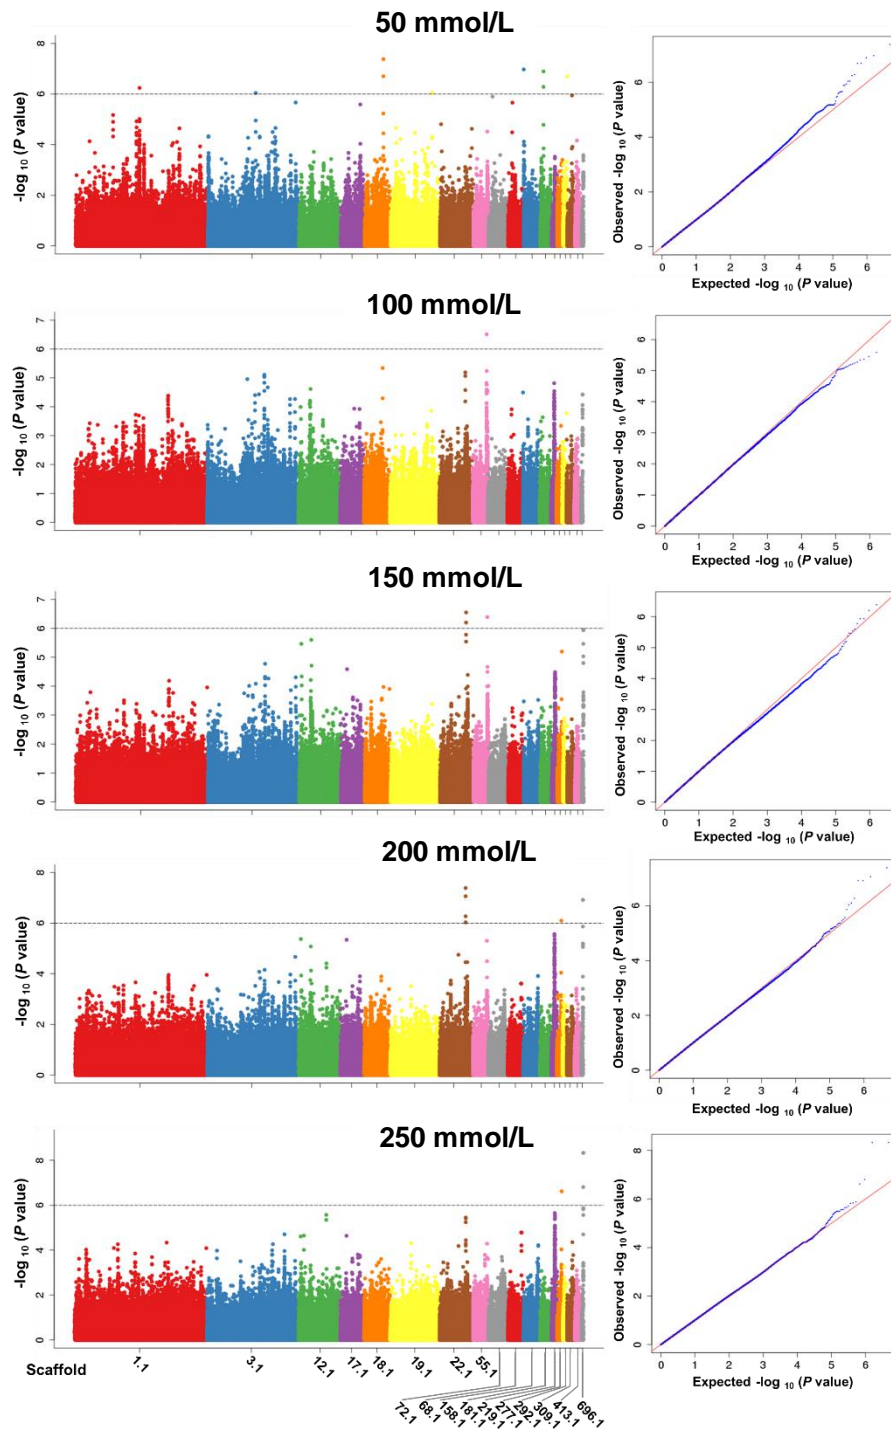

**Supplemental Fig. S7** Manhattan plots and Q-Q plots for GWAS of the GRIs under five NaCl concentration gradients using the second group that contains 200 individuals of *P. euphratica* and the intermediate cluster (Peu & Im).

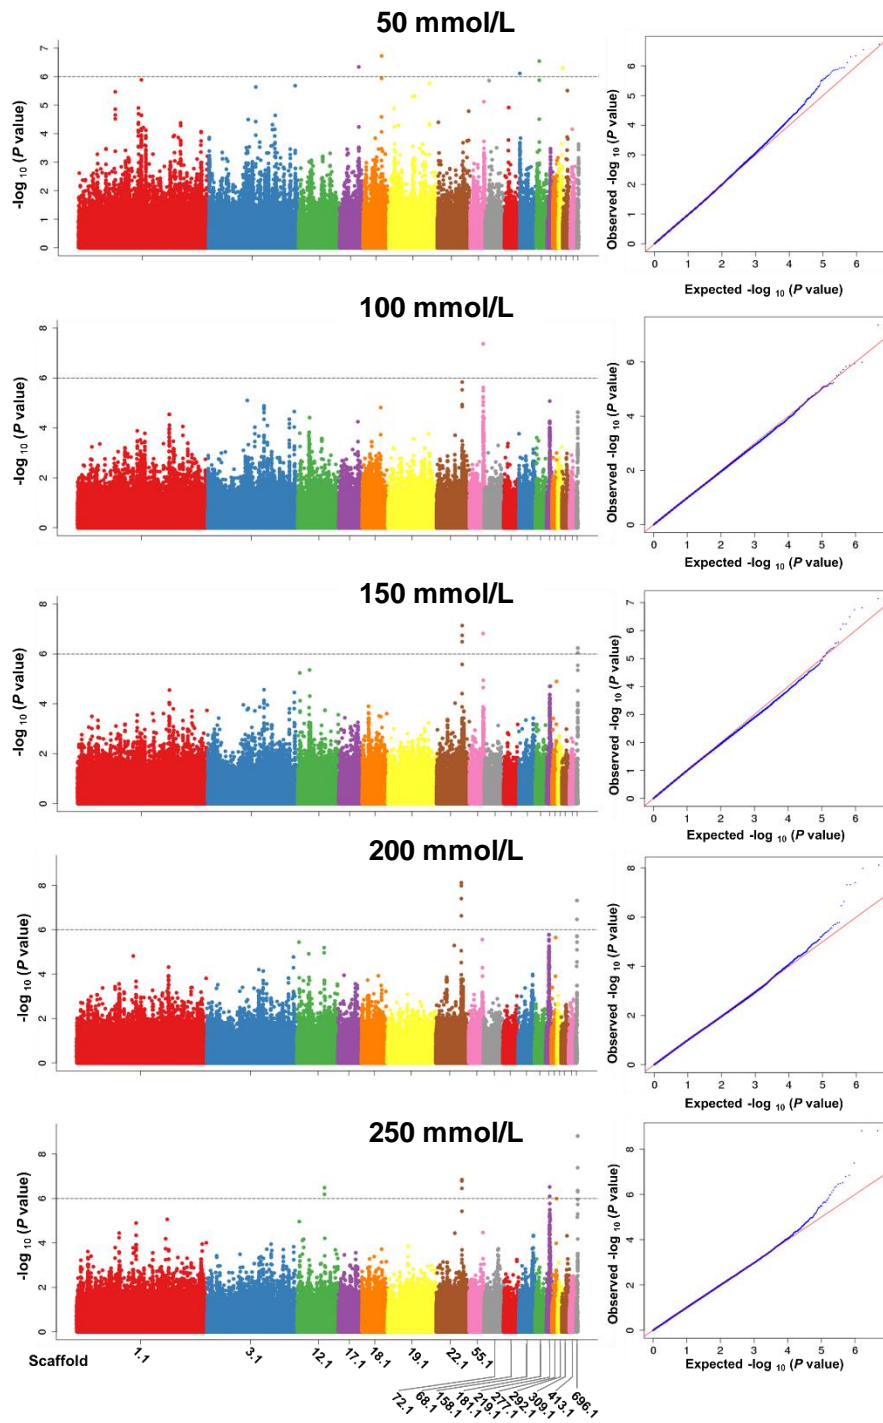

**Supplemental Fig. S8** Manhattan plots and Q-Q plots for GWAS of the GRIs under five NaCl concentration gradients using the third group that contains only 187 *P. euphratica* individuals (Peu).



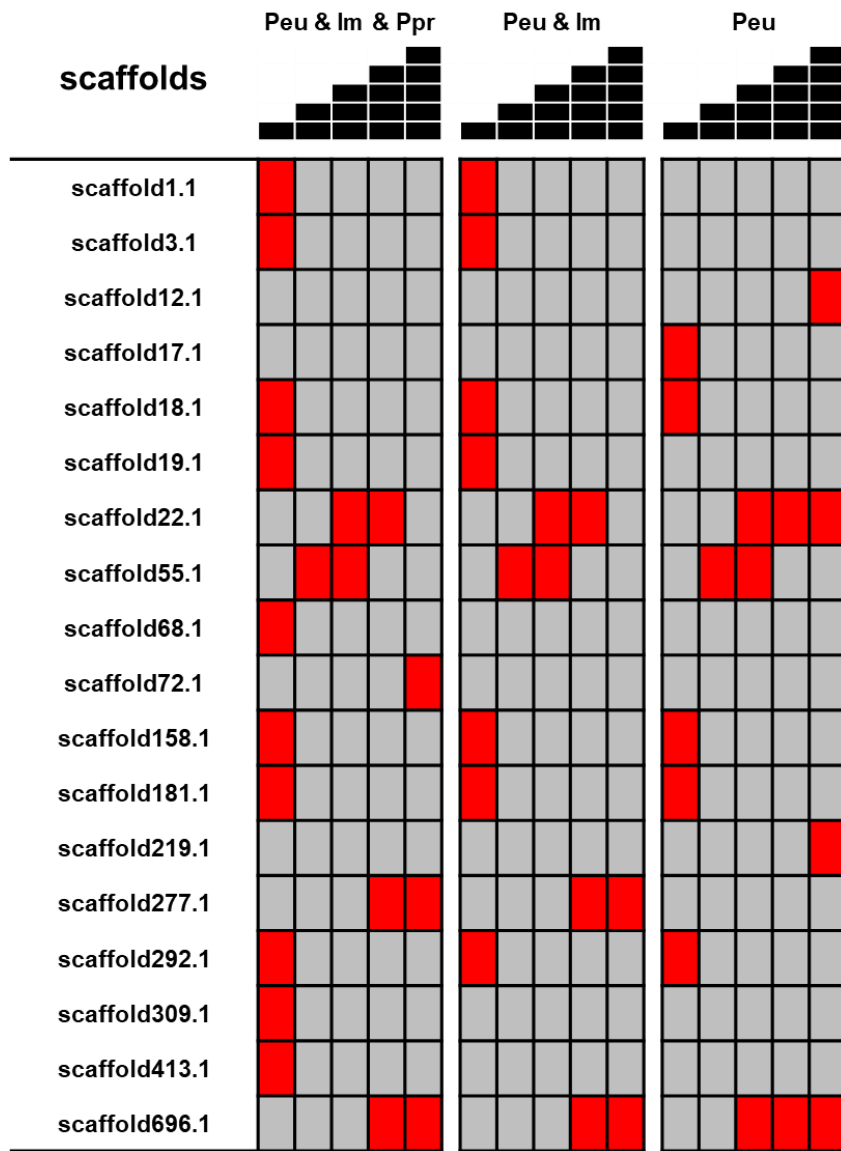

**Supplemental Fig. S9** Comparison of GWAS results with three groups of samples: (i) the first group includes all 210 individuals (Peu & Im & Ppr); (ii) the second group contains 200 individuals of *P. euphratica* and the intermediate cluster (Peu & Im); (iii) the third group contains only 187 *P. euphratica* individuals (Peu).

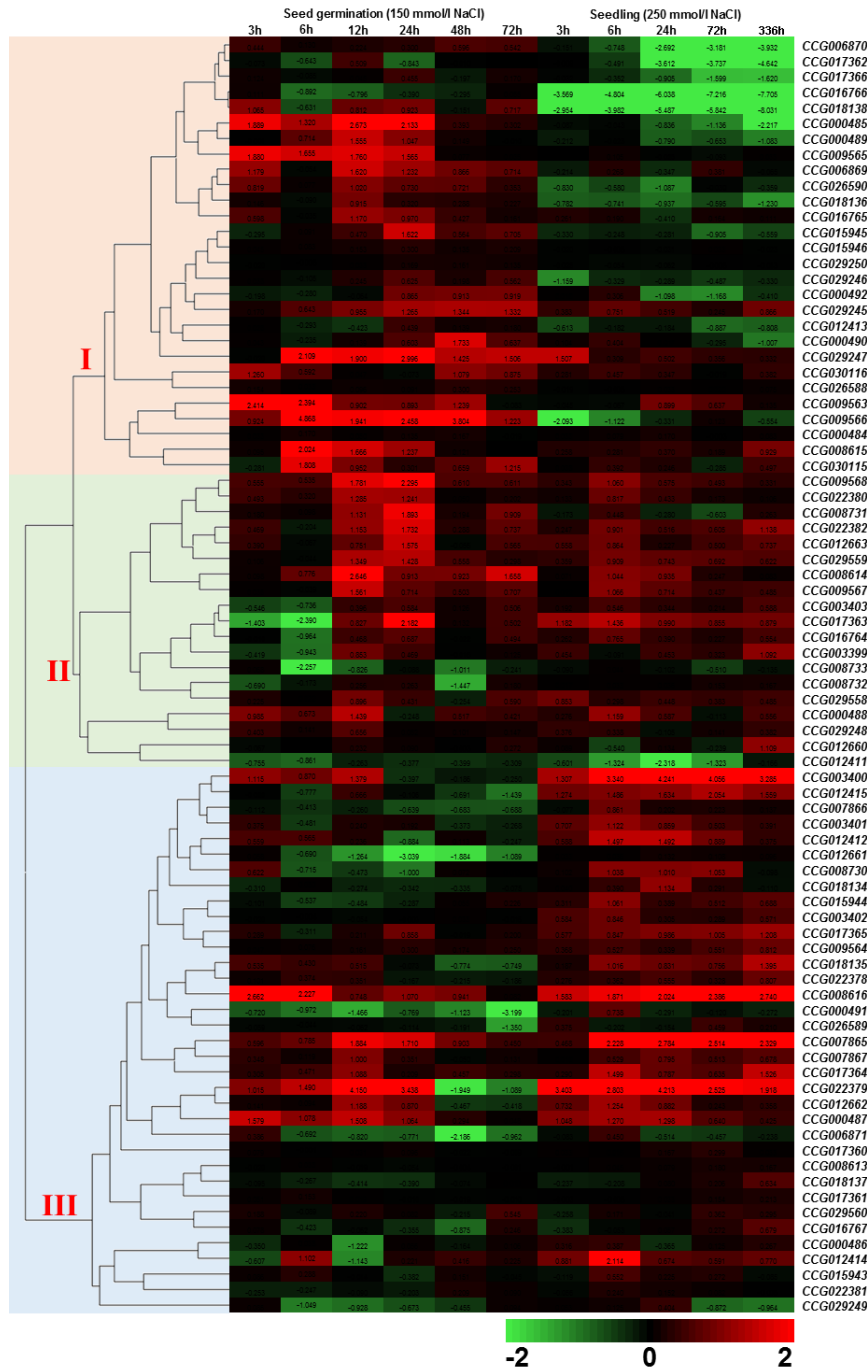

**Supplemental Fig. S10** Hierarchical clustering and expression analysis of 82 candidate genes under salt stress. Heat map representation of the expression patterns of candidate genes after treatments for 3 h, 6 h, 12 h, 24 h, 48 h, and 72 h under 150 mmol/L NaCl during seed germination and for 3 h, 6 h, 24 h, 72 h, and 336 h under 250 mmol/L NaCl for seedlings. The gene expression levels are determined using qRT-PCR. The different colors correspond to  $\log_2$ -transformed values compared with the control (0 mmol/L) at the corresponding period. Red and green correspond to the upregulation and downregulation of candidate genes, respectively.

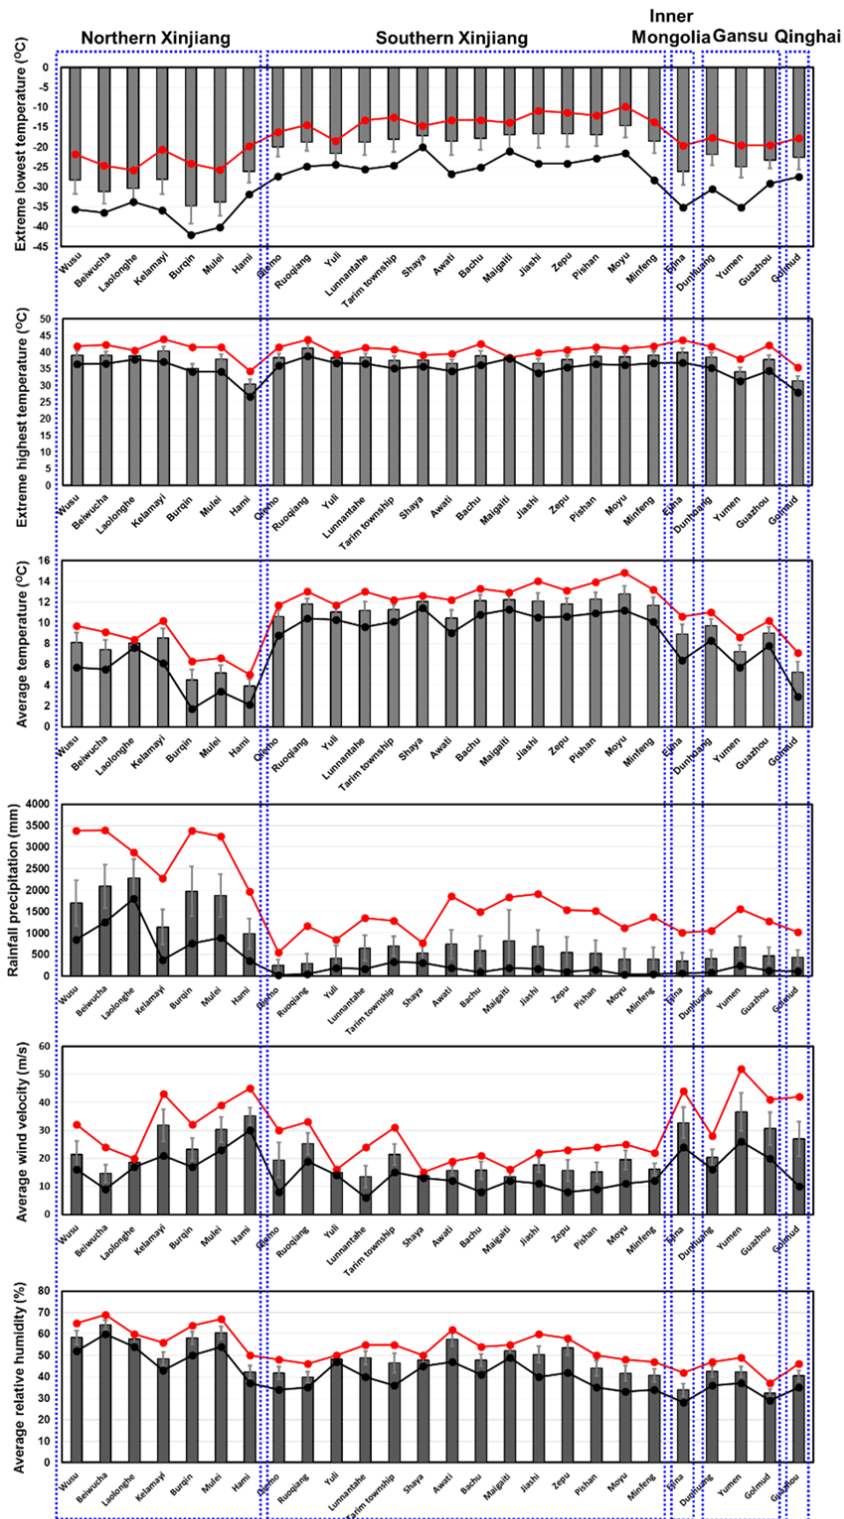

**Supplemental Fig. S11** Climate factors of sample collection regions during 1960-2012. These data are collected from the China Meteorological Administration website.

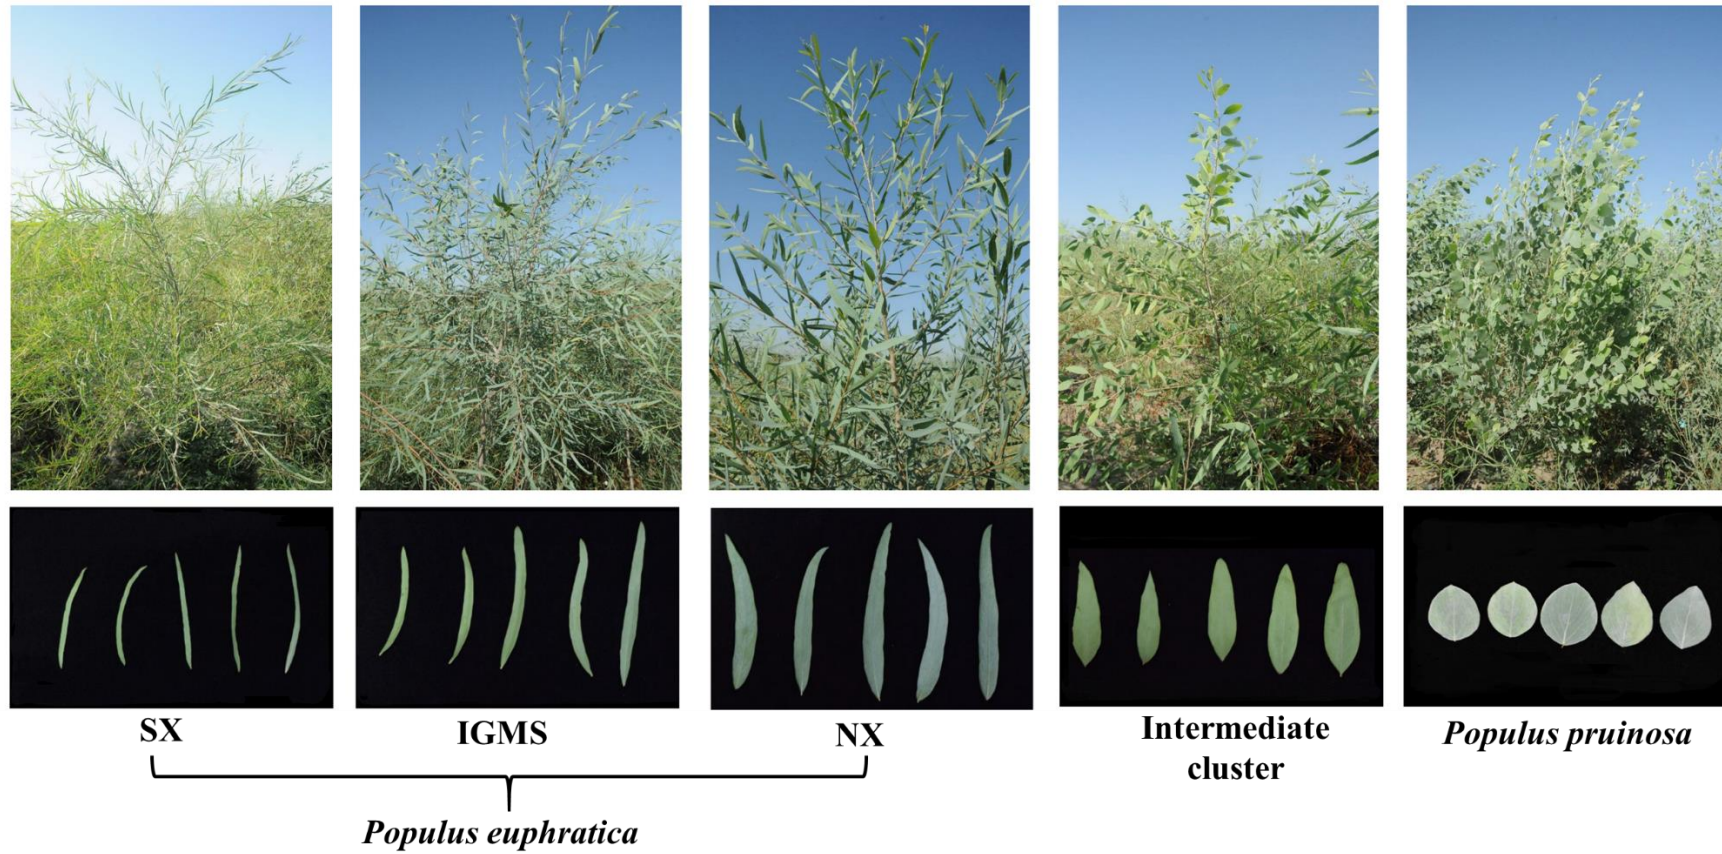

**Supplemental Fig. S12.** Phenotypic traits of two-year-old *P. euphratica* and *P. pruinosa* in a common garden that is established in Manas County in Northern Xinjiang.

**Supplemental Table S1** A list of *P. euphratica* and *P. pruinosa* individuals used for genome resequencing and their locations and altitudes.

| Species              | Province          | Subregion                           | Population | Individual number | Latitude (N) | Longitude (E) | Altitude (m) |
|----------------------|-------------------|-------------------------------------|------------|-------------------|--------------|---------------|--------------|
| <i>P. euphratica</i> | Xinjiang          | northern Xinjiang                   | Wusu       | 10                | 44°37'       | 83°51'        | 328-354      |
|                      |                   |                                     | Beiwucha   | 10                | 44°39'       | 86°20'        | 355-364      |
|                      |                   |                                     | Laolonghe  | 10                | 44°20'       | 87°15'        | 433-441      |
|                      |                   |                                     | Kelamayi   | 5                 | 45°52'       | 85°20'        | 282-288      |
|                      |                   |                                     | Burqin     | 5                 | 47°42'       | 86°48'        | 483-498      |
|                      |                   |                                     | Mulei      | 5                 | 44°49'       | 91°17'        | 741-751      |
|                      |                   |                                     | Hami       | 5                 | 43°44'       | 95°06'        | 445-452      |
|                      |                   | Qiemo                               | 11         | 38°41'            | 86°56'       | 1008-1017     |              |
|                      |                   | Ruoqiang                            | 11         | 39°55'            | 88°22'       | 810-838       |              |
|                      |                   | Yuli                                | 11         | 41°02'            | 86°21'       | 870-880       |              |
|                      |                   | Lunnantahe                          | 10         | 41°10'            | 84°24'       | 914-921       |              |
|                      |                   | Lunnan park of <i>P. euphratica</i> | 11         | 41°15'            | 84°15'       | 916-924       |              |
|                      |                   | Tarim township                      | 9          | 41°11'            | 83°38'       | 936-945       |              |
|                      |                   | Shaya                               | 9          | 41°01'            | 82°18'       | 967-978       |              |
|                      | southern Xinjiang | Awati                               | 11         | 40°18'            | 80°22'       | 1016-1039     |              |
|                      |                   | Bachu                               | 10         | 39°28'            | 78°18'       | 1128-1159     |              |
|                      |                   | Maigaiti                            | 10         | 39°21'            | 78°10'       | 1140-1148     |              |
|                      |                   | Jiashi                              | 10         | 39°29'            | 76°42'       | 1209-1219     |              |
|                      |                   | Desert road                         | 5          | 38°07'            | 80°14'       | 1220-1264     |              |
|                      |                   | Pishan                              | 9          | 37°38'            | 78°13'       | 1327-1379     |              |
|                      |                   | Moyu                                | 7          | 37°34'            | 79°37'       | 1275-1299     |              |
|                      | Minfeng           | 10                                  | 37°12'     | 82°54'            | 1374-1388    |               |              |
|                      | Inner Mongolia    | Ejina                               | Ejina      | 21                | 42°02'       | 101°18'       | 909-963      |
| Gansu                | —                 | Dunhuang                            | 5          | 40°10'            | 94°50'       | 1098-1101     |              |
|                      |                   | Yumen                               | 5          | 40°32'            | 96°46'       | 1381-1382     |              |
|                      |                   | Guazhou                             | 20         | 40°29'            | 95°38'       | 1152-1289     |              |
| Qinghai              | —                 | Golmud                              | 7          | 36°27'            | 94°21'       | 2786-2801     |              |
| <i>P. pruinosa</i>   | Xinjiang          | southern Xinjiang                   | Zepu       | 5                 | 38°02'       | 76°58'        | 1395-1440    |
|                      |                   |                                     | Maigaiti   | 1                 | 39°21'       | 78°10'        | 1142         |
|                      |                   |                                     | Jiashi     | 2                 | 39°29'       | 76°42'        | 1210-1220    |
|                      |                   |                                     | Buchu      | 1                 | 39°29'       | 78°17'        | 1135         |
|                      |                   |                                     | Awati      | 1                 | 40°19'       | 80°22'        | 1034         |

**Supplemental Table S2** Gene primers used in qRT-PCR analysis.

| Gene name | Forward primers (5'→3') | Reverse primers (5'→3') |
|-----------|-------------------------|-------------------------|
| CCG000484 | CGTTGGAGGTGAATGCAGTA    | GGTACTTCTCCAACCGTTGA    |
| CCG000485 | TCGGCAACACTGGAGGTATT    | CCCTGTTGAATCGTGCATGT    |
| CCG000486 | GGGCGGGTGTGTTTAAGTTT    | TTCTTCTCCCATATGGCCCG    |
| CCG000487 | TCGTGGACAGCATTTCAAGC    | AGGTCTTGACTTGGGCTGTT    |
| CCG000488 | AGGGGATGTAAAGGACGTGG    | CCTGTTTGCCCTATAACGC     |
| CCG000489 | AGGGTCAGCATTGCAAACAG    | GGAGCCAAGAAAGGAGGAGT    |
| CCG000490 | ATTCTGCTGCTGTTGGATGC    | CGCCGAATCTGCAACTTCAA    |
| CCG000491 | CGGACATGGCTGCATTCTAC    | TCCACCCTCATGTCAGCAAT    |
| CCG000492 | GGAGGTGGAGGCTTTGGT      | TGCCGCCTCCAATTCCTA      |
| CCG017360 | GCAGTGATTTGGTTGGTTCGA   | GCTCTAGATGTTCCCGTTTGAAT |
| CCG017361 | GCCTTCATCTATCTCAGCGC    | TTCAATCCTCCGTTGTCTGC    |
| CCG017362 | GAGGCACACACAAAGAAGCT    | ATGGTGGCAGAGGGTTAACA    |
| CCG017363 | CCAAGCTCGGACCAATCATG    | AACGCTGCGCAGAAATCTAG    |
| CCG017364 | TGTGAGTGCTGTTCTGTTGC    | CCAAACATCCCTTCCGCAA     |
| CCG017365 | TCATTTGCAAGTCACCGGTG    | TCGCCCGATGGTAGCTTAAT    |
| CCG017366 | GAGACACAACAACCACCACC    | TCGACCATCCTCACAAACCA    |
| CCG008613 | GGTGAATGGTGTAGTGGGGA    | ATCTCCACCACTGTTTCCCC    |
| CCG008614 | CTGCATGCATGGTGGACTTT    | ACAACCTGATGAGCTCGACA    |
| CCG008615 | TGGAATCATTACCAGGTTGCT   | ATCCCTTGAAGTGATGCAAAGT  |
| CCG008616 | AGAAGAGGTTAGCTCCGTGG    | GAAATTCAGTGTCGCCCCAG    |
| CCG009563 | CTGTTTCAAAGCTCGGCCT     | GACAGGAAATGGTTCGATGGC   |
| CCG009564 | TTCACACTGACCTGAAGCCA    | AGGGGCTCTGTAATGTCTCG    |
| CCG009565 | AAGCATGGTCTCGGCATAGA    | TTGATCCCATGGTAGCTGCA    |
| CCG009566 | CGCGAAAAGACTGGAGAAGG    | ACTGAACCTTCCCATCTGCA    |
| CCG009567 | TACGTCTTGCAGGCTTGACT    | GTGCCGTCGTATTGGAGAAC    |
| CCG009568 | GATGGACCTCGCAGCAATTT    | TTGCTACTCCCATGGCTGAA    |
| CCG029245 | TTGCAGGTACCCCAGAAGAG    | TTGGGAGGGTGGAAAGACTC    |
| CCG029246 | CTCAGAACTCGGGTGTGACT    | GCATTTCCACCCCATGATCC    |
| CCG029247 | TGTTGGCAGATGGGATGACT    | GTTTCATCCCCATTGCATCCC   |
| CCG029248 | GAGAGTGAGGCGTGGGAATA    | TTTTCCAATGACTCGTGCCC    |
| CCG029249 | GATGAAGCCGAGGGAAGGTA    | AGCCAAATCGCCTCTCTCTT    |
| CCG029250 | CCATTTGCGCTTCTGTGGAC    | GAGGTAATGGCTGAAACGCA    |
| CCG006869 | ACGCCTGACAACAAAATCCC    | TGAACGACCGTCCAATCTCT    |
| CCG006870 | ATGGACAGCAGGAGAAGAGC    | CTGCATGCATCTCTGACACC    |
| CCG006871 | GCTCAGTGGGTCAGGTTAGT    | CCCACAACCAACTGTACAGC    |
| CCG008730 | GAGGGAGCCAAGGAGAGTTT    | TTTCCCAACACAGCCCCTAA    |
| CCG008731 | CTCCTTCCTTGTTCGCATTCG   | TCCTTCGAAACTCCACTCCC    |
| CCG008732 | AGTTCGTTTGCTCTGCTGTT    | CCAGATCCGGTGTCTAAAAC    |
| CCG008733 | GAGTGAGCTTGCCAAAACA     | CTTTTCCCTGGACTGCAACC    |
| CCG016764 | GGGACTCCAGCACAGAATCT    | AAGTCTCTGGCTCTGGTTCC    |
| CCG016765 | CATGCGGTCATCATCTCTGC    | CGCGAGAATCCTTCATTGCA    |
| CCG016766 | CCCTGTAGGTGCTGTGAAGA    | CCATCCACAAAACCCAAGCA    |
| CCG016767 | TGCAACTGATGTGCTTGGTC    | ATGGAACCTCACAGCCTGAA    |
| CCG018134 | TGAGCGACTTGTTCCATCCT    | TCATTTGCCTGTGATTCTGCA   |
| CCG018135 | TTCCCTTCACAACTGCCTCT    | TTGGAAGAAACGTTGGCAGG    |
| CCG018136 | GCGTTGCTCTTCTCACAGT     | ATGATCAGAAACAGCACGGC    |

|                  |                          |                          |
|------------------|--------------------------|--------------------------|
| <i>CCG018137</i> | TGCTTGGTCGTGGTATGGAT     | ATGGAACCTCACAGCCTGAA     |
| <i>CCG018138</i> | CCTCGCCTTGCTCAATAACC     | CCGAAAAGAACCACACCAGG     |
| <i>CCG022378</i> | ACGATTCAGGAGCCAGTTCA     | CTTCCCTGCCAGCAAACAAT     |
| <i>CCG022379</i> | GAACAACAGAGGAGTGACGC     | TGAAGTGCTGTCTCCCCATT     |
| <i>CCG022380</i> | ATATTGGCGTGGAGGAGAGG     | GTGCGTCGATTCTCCCTAGA     |
| <i>CCG022381</i> | AAAGGCCAGGGATGGATTGA     | AGACAGATTGACAGGCACCA     |
| <i>CCG022382</i> | AGGAGGAGATTGCTTGCAGT     | TTGCAGACAACTTCAGTGGC     |
| <i>CCG007865</i> | TCCACTTCCTGTTCCACCTC     | AGAATCTTGTCAGCCACGA      |
| <i>CCG007866</i> | CACTTGCTAGAGGGTGGTGA     | TGTCTGTTGCCCTTTTCTGC     |
| <i>CCG007867</i> | GTGGGAAAGGAACCTGCAAG     | TTGCTTGCTTTCCCTTGGAC     |
| <i>CCG026588</i> | CCATGGGAGGTAATGCTGTT     | GTTCTTCCGTGGCTTCGATG     |
| <i>CCG026589</i> | GCCACCAACCAAGAAAACCT     | TCTTCAGCCTCCTCAAACGT     |
| <i>CCG026590</i> | AGGCAGACACAACCCATACA     | TGCTTGGTGTGGTGTCAATG     |
| <i>CCG012660</i> | GGTTCAAGTGTGTCAGCTCG     | CTTGCCCTTGACAAATGCCT     |
| <i>CCG012661</i> | CTCAAGGCCAGACGGAACTA     | CAAGTGGGCAAAAGAGGCTT     |
| <i>CCG012662</i> | CTTGATTGGCCATGATGCGA     | ATTGCCTCAGTCCACTCTCC     |
| <i>CCG012663</i> | CCGAGGTGGTTTTCTTTGGG     | TAACCAACCACTGTCACCGA     |
| <i>CCG015943</i> | CCGCTTACAGATGCTTCACC     | TTTTCTTGGTCCATGCCTCT     |
| <i>CCG015944</i> | GAAGCGGTTGAGACATGTCC     | TGAGACACCAGTGCCAATCT     |
| <i>CCG015945</i> | CAATGATCTCAGCGGCAACA     | TACCGTCAACCCCGCTATTT     |
| <i>CCG015946</i> | CCGAATGTCATGAACCACGT     | GTTCAAGGTCAGGCAGAGGA     |
| <i>CCG029558</i> | TGCAATGCTCTTTTGTGGCT     | AAGAGGAATGGGAACGAGCA     |
| <i>CCG029559</i> | TATGAGATGGGTCCGGATGC     | GTCCTTGGGTACGGTTTTTC     |
| <i>CCG029560</i> | CAGCAAGCGTCAATCTGTGA     | CTGGCATTGGGGTTCTCAAA     |
| <i>CCG030115</i> | ACGGCAGCCTCTTTCTTTTG     | GCCTTGCTATTCTTCCCTGC     |
| <i>CCG030116</i> | ACGGCAGCCTCTTTCTTTTG     | GCCTTGCTATTCTTCCCTGC     |
| <i>CCG003399</i> | CTCGTTGAAGGTCTGAAGCG     | TCTCAGCCCCACCCATAAAG     |
| <i>CCG003400</i> | ACCTCAACAAGTGTGAGCCT     | AACAAGAGTGCCCTTACGGA     |
| <i>CCG003401</i> | TTAATGCAAAACCCAGGCC      | TGAAACCTCACTCGACTCCC     |
| <i>CCG003402</i> | GCGCTAGAGATGAGGACGAA     | AGCTGCTCTGTCTTGTGTA      |
| <i>CCG003403</i> | CACAAATTGGGGCCATTGGA     | AAAGTGTGGCCGGATGAAAC     |
| <i>CCG012411</i> | GCCCAATTCAGCCAGGAAAA     | AACAGCTTCGTCAATCACCG     |
| <i>CCG012412</i> | AGATTGCGACTTTGGAAGGC     | GCGAGGCAGAAAATTTGTCA     |
| <i>CCG012413</i> | AATAGTGGTGGAGGTGGTGG     | ACCAGCCCATAGTTTCACGA     |
| <i>CCG012414</i> | CATTTCCGGACCTTCTGCAG     | CCTCCGCCACTACCAATACT     |
| <i>CCG012415</i> | GCAGAGCCTACAGATGGTCA     | AAGAAGAGGCTGGTAGAGGG     |
| <i>PeuEF1a</i>   | TCCGTCTTCCACTTCAGGATGTCT | GTCACGACCATAACCAGGCTTCAG |
| <i>AtActin</i>   | CGGTGGTTCCATTCTTGC       | GGACCTGCCTCATCATACTC     |

---

**Supplemental Table S3** Sequence depth and coverage depth.

| Species              | Population | Individual code | Clades   | Total reads | Mapped Reads | Mapping rate (%) | Average depth (x) | Coverage at least 1X (%) | Coverage at least 4X (%) | Totol SNPs | Homozygous SNPs | Heterozygosis SNPs |
|----------------------|------------|-----------------|----------|-------------|--------------|------------------|-------------------|--------------------------|--------------------------|------------|-----------------|--------------------|
| <i>P. euphratica</i> | Wusu       | LJ-201          | NX       | 38463538    | 37872049     | 98.46            | 10.33             | 88.85                    | 69.13                    | 964317     | 362900          | 601417             |
|                      |            | LJ-202          | NX       | 42637556    | 41914556     | 98.30            | 11.33             | 88.14                    | 68.84                    | 962093     | 368662          | 593431             |
|                      |            | LJ-203          | NX       | 42275974    | 41513845     | 98.20            | 11.84             | 85.12                    | 64.29                    | 964212     | 358016          | 606196             |
|                      |            | LJ-204          | NX       | 48003386    | 46795328     | 97.48            | 11.50             | 91.60                    | 77.51                    | 968658     | 372963          | 595695             |
|                      |            | LJ-205          | NX       | 50147296    | 48955497     | 97.62            | 12.84             | 91.38                    | 77.41                    | 963908     | 368685          | 595223             |
|                      |            | LJ-206          | NX       | 41475500    | 40677128     | 98.08            | 10.99             | 89.58                    | 71.18                    | 961732     | 358890          | 602842             |
|                      |            | LJ-207-c        | NX       | 49414038    | 48473099     | 98.10            | 13.51             | 87.21                    | 70.33                    | 974297     | 373994          | 600303             |
|                      |            | LJ-208          | NX       | 39800470    | 38931766     | 97.82            | 10.59             | 88.36                    | 69.04                    | 972292     | 368376          | 603916             |
|                      |            | LJ-209          | NX       | 39804006    | 38962244     | 97.89            | 10.71             | 87.95                    | 67.55                    | 965943     | 366450          | 599493             |
|                      |            | LJ-210          | NX       | 56585870    | 55244256     | 97.63            | 14.46             | 89.72                    | 73.84                    | 977961     | 366706          | 611255             |
|                      | LJ-211-c   | NX              | 45960334 | 45152947    | 98.24        | 11.97            | 91.37             | 77.40                    | 979199                   | 359892     | 619307          |                    |
|                      | LJ-212     | NX              | 44038088 | 43084640    | 97.83        | 11.50            | 90.61             | 75.12                    | 967718                   | 371013     | 596705          |                    |
|                      | LJ-213     | NX              | 49525612 | 48297344    | 97.52        | 12.46            | 91.68             | 78.17                    | 962060                   | 369425     | 592635          |                    |
|                      | LJ-214     | NX              | 39169490 | 38343339    | 97.89        | 10.76            | 86.20             | 64.93                    | 954251                   | 362925     | 591326          |                    |
|                      | LJ-215     | NX              | 44722686 | 44041541    | 98.48        | 12.04            | 88.41             | 69.09                    | 956648                   | 362418     | 594230          |                    |
|                      | LJ-216     | NX              | 41586612 | 40544098    | 97.49        | 10.72            | 90.84             | 73.66                    | 964060                   | 356462     | 607598          |                    |
|                      | LJ-217     | NX              | 41014390 | 40379034    | 98.45        | 10.89            | 89.89             | 73.38                    | 938735                   | 374408     | 564327          |                    |
|                      | LJ-218     | NX              | 47036336 | 46240206    | 98.31        | 12.62            | 87.71             | 69.82                    | 965914                   | 371539     | 594375          |                    |
|                      | LJ-219-c   | NX              | 49653378 | 48021890    | 96.71        | 10.68            | 87.90             | 68.23                    | 955475                   | 368653     | 586822          |                    |
|                      | LJ-220     | NX              | 9222140  | 9108675     | 98.77        | 3.35             | 67.32             | 16.94                    | 970847                   | 364761     | 606086          |                    |
|                      | LJ-221     | NX              | 38976730 | 38148117    | 97.87        | 10.11            | 90.65             | 72.72                    | 971575                   | 361521     | 610054          |                    |
|                      | LJ-222-c   | NX              | 41203458 | 40584686    | 98.50        | 11.17            | 88.51             | 72.16                    | 962180                   | 370221     | 591959          |                    |
|                      | LJ-223     | NX              | 64984192 | 63660824    | 97.96        | 16.25            | 91.28             | 78.94                    | 974287                   | 367367     | 606920          |                    |
| LJ-224               | NX         | 45844916        | 44401944 | 96.85       | 11.56        | 92.03            | 78.96             | 972988                   | 380637                   | 592351     |                 |                    |
| LJ-225-c             | NX         | 38214210        | 37584285 | 98.35       | 10.53        | 87.24            | 68.30             | 955674                   | 371510                   | 584164     |                 |                    |
| LJ-226               | NX         | 57196450        | 56006451 | 97.92       | 14.51        | 92.84            | 82.69             | 979662                   | 385081                   | 594581     |                 |                    |
| LJ-227               | NX         | 51149890        | 49889974 | 97.54       | 12.82        | 91.50            | 78.20             | 964706                   | 370167                   | 594539     |                 |                    |
| LJ-228               | NX         | 44020978        | 43342109 | 98.46       | 11.73        | 89.27            | 71.21             | 962774                   | 364490                   | 598284     |                 |                    |
| LJ-229               | NX         | 50977730        | 49972942 | 98.03       | 13.18        | 91.54            | 79.30             | 962009                   | 372532                   | 589477     |                 |                    |
| LJ-230               | NX         | 43967012        | 43093407 | 98.01       | 11.29        | 91.56            | 77.61             | 957309                   | 363617                   | 593692     |                 |                    |
| LJ-78                | NX         | 36999906        | 36373814 | 98.31       | 10.11        | 88.05            | 67.09             | 963292                   | 375899                   | 587393     |                 |                    |
| LJ-79                | NX         | 43576170        | 42893467 | 98.43       | 11.92        | 87.35            | 68.63             | 968175                   | 378798                   | 589377     |                 |                    |
| LJ-80                | NX         | 38950270        | 38253461 | 98.21       | 10.34        | 89.56            | 70.90             | 965563                   | 376732                   | 588831     |                 |                    |
| LJ-81                | NX         | 41202592        | 40432859 | 98.13       | 10.68        | 91.18            | 75.59             | 967660                   | 377423                   | 590237     |                 |                    |
| LJ-82                | NX         | 38041792        | 37313357 | 98.09       | 9.96         | 90.54            | 72.82             | 963551                   | 376159                   | 587392     |                 |                    |
| Burqin               | LJ-52      | Intermediate    | 42884364 | 41149048    | 95.95        | 11.40            | 84.52             | 58.49                    | 1515474                  | 391179     | 1124295         |                    |
|                      | LJ-53      | NX              | 43908348 | 42917370    | 97.74        | 11.57            | 88.39             | 66.91                    | 936123                   | 364506     | 571617          |                    |



|          |          |              |          |          |          |       |       |       |         |        |         |
|----------|----------|--------------|----------|----------|----------|-------|-------|-------|---------|--------|---------|
|          | LJ-54    | NX           | 38140134 | 37416075 | 98.10    | 10.10 | 89.02 | 69.21 | 946807  | 367735 | 579072  |
|          | LJ-55    | Intermediate | 44197798 | 42178751 | 95.43    | 11.36 | 88.49 | 67.65 | 1518141 | 410596 | 1107545 |
|          | LJ-56    | Intermediate | 45563612 | 43800750 | 96.13    | 11.88 | 86.54 | 64.72 | 1537031 | 409668 | 1127363 |
| Mulei    | LJ-73    | NX           | 41925400 | 41140855 | 98.13    | 10.93 | 90.13 | 72.22 | 963708  | 368286 | 595422  |
|          | LJ-74    | NX           | 43341302 | 42546037 | 98.17    | 11.41 | 89.00 | 70.44 | 966277  | 367970 | 598307  |
|          | LJ-75    | NX           | 38011846 | 37373918 | 98.32    | 10.27 | 87.84 | 66.77 | 961515  | 366479 | 595036  |
|          | LJ-76    | IMGS         | 43398636 | 42566322 | 98.08    | 11.84 | 87.75 | 68.46 | 967714  | 341354 | 626360  |
|          | LJ-77    | IMGS         | 50255550 | 49396959 | 98.29    | 13.17 | 90.01 | 74.83 | 973559  | 344497 | 629062  |
|          | Hami     | LJ-57-c      | IMGS     | 55402362 | 54614667 | 98.58 | 14.85 | 88.92 | 73.92   | 980549 | 319763  |
| LJ-59    |          | IMGS         | 40005420 | 39408860 | 98.51    | 10.69 | 88.57 | 67.96 | 986021  | 321691 | 664330  |
| LJ-60    |          | IMGS         | 43044908 | 42118843 | 97.85    | 11.01 | 91.06 | 73.47 | 990971  | 317737 | 673234  |
| LJ-61    |          | IMGS         | 40505226 | 39805293 | 98.27    | 10.67 | 89.41 | 69.81 | 987832  | 321457 | 666375  |
| LJ-62    |          | IMGS         | 41413626 | 40652740 | 98.16    | 10.85 | 89.97 | 72.01 | 972428  | 348723 | 623705  |
| Qiemo    | LJ-93    | SX           | 51117872 | 49979036 | 97.77    | 12.71 | 91.17 | 77.52 | 986961  | 344002 | 642959  |
|          | LJ-94    | SX           | 42264326 | 40775070 | 96.48    | 11.00 | 87.46 | 67.35 | 957686  | 344552 | 613134  |
|          | LJ-95    | SX           | 44561962 | 43612209 | 97.87    | 11.33 | 90.12 | 73.90 | 985023  | 342123 | 642900  |
|          | LJ-96    | SX           | 47926566 | 45939169 | 95.85    | 11.66 | 91.68 | 79.09 | 954989  | 375518 | 579471  |
|          | LJ-97    | SX           | 54533420 | 53359506 | 97.85    | 13.17 | 92.94 | 82.97 | 983606  | 336401 | 647205  |
|          | LJ-98    | SX           | 48139600 | 46927710 | 97.48    | 11.99 | 90.32 | 74.68 | 974674  | 339999 | 634675  |
|          | LJ-99    | SX           | 38598196 | 37995634 | 98.44    | 9.96  | 90.10 | 71.67 | 970507  | 333495 | 637012  |
|          | LJ-100   | SX           | 48339992 | 47384754 | 98.02    | 11.68 | 89.00 | 71.30 | 976882  | 373153 | 603729  |
|          | LJ-101-c | SX           | 40234908 | 39687384 | 98.64    | 11.02 | 87.02 | 67.55 | 964522  | 342886 | 621636  |
|          | LJ-102   | SX           | 45392488 | 44440208 | 97.90    | 11.19 | 89.67 | 71.84 | 992270  | 344915 | 647355  |
|          | LJ-269   | SX           | 50371878 | 49490531 | 98.25    | 13.38 | 89.18 | 74.01 | 977978  | 333670 | 644308  |
| Ruoqiang | LJ-103   | SX           | 38095638 | 37444551 | 98.29    | 10.20 | 86.02 | 64.56 | 962866  | 344726 | 618140  |
|          | LJ-104   | SX           | 40801320 | 39832748 | 97.63    | 10.42 | 89.44 | 70.53 | 959292  | 336951 | 622341  |
|          | LJ-105   | SX           | 38797724 | 38186293 | 98.42    | 10.28 | 87.40 | 66.23 | 982173  | 334009 | 648164  |
|          | LJ-106   | SX           | 40056962 | 39218776 | 97.91    | 10.03 | 91.43 | 75.06 | 994445  | 343866 | 650579  |
|          | LJ-107   | SX           | 46525924 | 44936461 | 96.58    | 11.32 | 89.21 | 70.43 | 968339  | 336882 | 631457  |
|          | LJ-108   | SX           | 40020104 | 39335468 | 98.29    | 10.23 | 91.19 | 75.06 | 977716  | 339708 | 638008  |
|          | LJ-109-c | SX           | 40374810 | 39705683 | 98.34    | 10.65 | 89.54 | 70.49 | 993922  | 343552 | 650370  |
|          | LJ-110   | SX           | 56886318 | 55889624 | 98.25    | 14.33 | 90.26 | 75.73 | 983811  | 331825 | 651986  |
|          | LJ-111   | SX           | 49686650 | 48938061 | 98.49    | 12.72 | 90.07 | 74.40 | 965001  | 352463 | 612538  |
|          | LJ-112   | SX           | 43538736 | 42742897 | 98.17    | 11.38 | 87.68 | 67.57 | 974855  | 341005 | 633850  |
|          | LJ-270   | SX           | 41996018 | 41348814 | 98.46    | 11.19 | 88.61 | 70.43 | 967546  | 343048 | 624498  |
|          | Yuli     | LJ-1         | SX       | 47362176 | 46430603 | 98.03 | 11.61 | 89.11 | 70.16   | 979419 | 344520  |
| LJ-2     |          | SX           | 42342972 | 41730650 | 98.55    | 11.61 | 87.52 | 66.48 | 983127  | 339716 | 643411  |
| LJ-3     |          | SX           | 47162590 | 46060960 | 97.66    | 12.09 | 90.10 | 73.06 | 983961  | 340874 | 643087  |
| LJ-4     |          | SX           | 45385336 | 44283548 | 97.57    | 11.04 | 88.60 | 68.53 | 957354  | 343052 | 614302  |
| LJ-5     |          | SX           | 38479858 | 37860931 | 98.39    | 10.46 | 88.27 | 67.48 | 968796  | 346283 | 622513  |
| LJ-6     |          | SX           | 46064886 | 45210656 | 98.15    | 12.30 | 88.81 | 70.19 | 993609  | 347882 | 645727  |

|                                    |          |              |          |          |       |       |       |       |         |        |         |
|------------------------------------|----------|--------------|----------|----------|-------|-------|-------|-------|---------|--------|---------|
|                                    | LJ-7     | SX           | 46645816 | 45674650 | 97.92 | 12.09 | 88.67 | 68.87 | 971621  | 341935 | 629686  |
|                                    | LJ-8     | Intermediate | 50608042 | 48121457 | 95.09 | 12.20 | 91.96 | 75.85 | 1530343 | 400870 | 1129473 |
|                                    | LJ-180   | SX           | 43000842 | 41966612 | 97.59 | 10.18 | 90.60 | 72.59 | 971083  | 343804 | 627279  |
|                                    | LJ-181   | SX           | 53670560 | 52659526 | 98.12 | 13.88 | 87.43 | 67.98 | 986873  | 328824 | 658049  |
|                                    | LJ-184   | SX           | 37491006 | 36910476 | 98.45 | 10.57 | 86.13 | 64.40 | 974247  | 336090 | 638157  |
|                                    | LJ-9     | SX           | 45361456 | 44475128 | 98.05 | 11.87 | 88.31 | 67.94 | 972166  | 329081 | 643085  |
|                                    | LJ-10    | SX           | 41446882 | 40771428 | 98.37 | 11.26 | 87.33 | 65.64 | 969575  | 335548 | 634027  |
|                                    | LJ-182   | SX           | 45527500 | 44405829 | 97.54 | 11.61 | 90.59 | 73.89 | 994210  | 336183 | 658027  |
|                                    | LJ-183   | SX           | 38624498 | 37879892 | 98.07 | 10.40 | 88.08 | 67.84 | 960803  | 336331 | 624472  |
| Lunnantahe                         | LJ-185-c | SX           | 41322336 | 40760059 | 98.64 | 11.47 | 86.21 | 67.68 | 967926  | 338549 | 629377  |
|                                    | LJ-186   | SX           | 37788332 | 37042086 | 98.03 | 10.49 | 84.69 | 61.36 | 951065  | 331156 | 619909  |
|                                    | LJ-187   | SX           | 37531958 | 36876201 | 98.25 | 9.96  | 89.78 | 70.84 | 970011  | 332737 | 637274  |
|                                    | LJ-188   | SX           | 42538040 | 41811651 | 98.29 | 11.35 | 88.15 | 69.07 | 986399  | 355053 | 631346  |
|                                    | LJ-189-c | SX           | 42324084 | 41651172 | 98.41 | 11.68 | 86.02 | 68.24 | 981756  | 338923 | 642833  |
|                                    | LJ-190   | SX           | 38352878 | 37740736 | 98.40 | 10.13 | 89.94 | 71.81 | 975642  | 338531 | 637111  |
|                                    | LJ-231   | SX           | 41691874 | 40864304 | 98.02 | 10.70 | 90.80 | 73.95 | 979743  | 346106 | 633637  |
|                                    | LJ-232   | SX           | 39361012 | 38647639 | 98.19 | 10.44 | 90.79 | 75.29 | 977178  | 350977 | 626201  |
|                                    | LJ-233   | SX           | 50668100 | 49513047 | 97.72 | 12.79 | 91.48 | 78.42 | 988165  | 336457 | 651708  |
|                                    | LJ-234   | SX           | 44394832 | 43462462 | 97.90 | 11.26 | 91.99 | 78.12 | 984642  | 342794 | 641848  |
| Lunnan park<br>of P.<br>euphratica | LJ-235   | SX           | 42169604 | 41336478 | 98.02 | 10.91 | 91.46 | 76.59 | 959538  | 339026 | 620512  |
|                                    | LJ-236   | SX           | 63079696 | 61459718 | 97.43 | 15.27 | 93.05 | 83.98 | 977028  | 335764 | 641264  |
|                                    | LJ-237   | SX           | 60777410 | 59757247 | 98.32 | 15.72 | 92.03 | 80.85 | 995786  | 348367 | 647419  |
|                                    | LJ-238   | SX           | 68098870 | 66740863 | 98.01 | 16.96 | 92.79 | 84.10 | 991923  | 350858 | 641065  |
|                                    | LJ-239   | SX           | 57161612 | 56056737 | 98.07 | 14.37 | 92.72 | 82.89 | 983398  | 339209 | 644189  |
|                                    | LJ-240   | SX           | 60120474 | 58896395 | 97.96 | 15.35 | 91.53 | 79.62 | 1000824 | 356569 | 644255  |
|                                    | LJ-257   | SX           | 54682920 | 53602972 | 98.03 | 13.88 | 92.29 | 81.03 | 985835  | 339042 | 646793  |
|                                    | LJ-143   | SX           | 42719574 | 41663613 | 97.53 | 11.31 | 88.52 | 68.57 | 979940  | 342426 | 637514  |
|                                    | LJ-144   | SX           | 44956962 | 44008176 | 97.89 | 11.87 | 88.59 | 69.04 | 983866  | 340096 | 643770  |
|                                    | LJ-145   | SX           | 43393810 | 42588370 | 98.14 | 11.78 | 87.31 | 69.06 | 983124  | 339627 | 643497  |
|                                    | LJ-146   | SX           | 41825086 | 41111103 | 98.29 | 10.86 | 90.92 | 73.54 | 971290  | 348135 | 623155  |
| Tarim<br>township                  | LJ-147   | SX           | 47781740 | 46600841 | 97.53 | 11.42 | 89.69 | 71.88 | 981374  | 341604 | 639770  |
|                                    | LJ-148   | SX           | 42965252 | 42198738 | 98.22 | 11.39 | 90.25 | 73.71 | 998112  | 341532 | 656580  |
|                                    | LJ-149   | SX           | 61036190 | 59872048 | 98.09 | 15.46 | 90.53 | 76.64 | 1005880 | 341520 | 664360  |
|                                    | LJ-151-c | SX           | 47452134 | 46377102 | 97.73 | 12.07 | 88.06 | 69.43 | 982639  | 331266 | 651373  |
|                                    | LJ-271   | SX           | 40267506 | 39527698 | 98.16 | 10.75 | 88.54 | 70.18 | 982585  | 356908 | 625677  |
|                                    | J-03     | SX           | 42823360 | 42197654 | 98.54 | 11.73 | 87.77 | 68.86 | 968134  | 344041 | 624093  |
|                                    | LJ-134   | SX           | 44173064 | 43223075 | 97.85 | 11.86 | 87.51 | 69.17 | 968333  | 344090 | 624243  |
|                                    | LJ-137   | SX           | 44607414 | 43818199 | 98.23 | 11.73 | 88.85 | 68.96 | 972552  | 348480 | 624072  |
| Shaya                              | LJ-138   | SX           | 45574294 | 44628103 | 97.92 | 11.96 | 88.75 | 69.15 | 965772  | 341544 | 624228  |
|                                    | LJ-139   | SX           | 45400438 | 44613454 | 98.27 | 11.90 | 90.11 | 73.19 | 981737  | 343531 | 638206  |
|                                    | LJ-140   | SX           | 50085038 | 49073057 | 97.98 | 12.79 | 90.31 | 74.87 | 973651  | 337178 | 636473  |

|          |         |              |          |          |       |       |       |       |         |        |         |
|----------|---------|--------------|----------|----------|-------|-------|-------|-------|---------|--------|---------|
|          | LJ-141  | SX           | 40712456 | 39806824 | 97.78 | 10.77 | 89.17 | 70.37 | 967401  | 332821 | 634580  |
|          | LJ-142  | SX           | 40012792 | 39260289 | 98.12 | 10.75 | 88.81 | 70.12 | 966482  | 336079 | 630403  |
|          | LJ-261  | SX           | 45510750 | 44767177 | 98.37 | 11.99 | 88.97 | 71.59 | 976917  | 336469 | 640448  |
|          | LJ-123  | SX           | 46887832 | 45979247 | 98.06 | 12.08 | 91.91 | 78.47 | 983528  | 339259 | 644269  |
|          | LJ-125  | SX           | 42712230 | 41850430 | 97.98 | 10.56 | 91.69 | 76.77 | 982155  | 344979 | 637176  |
|          | LJ-126  | SX           | 45269580 | 44454017 | 98.20 | 11.77 | 89.53 | 72.05 | 973786  | 343483 | 630303  |
|          | LJ-127  | SX           | 35996122 | 35463519 | 98.52 | 9.85  | 88.96 | 66.11 | 1149366 | 217398 | 931968  |
|          | LJ-128  | SX           | 37846356 | 37252847 | 98.43 | 10.90 | 83.83 | 61.13 | 970408  | 339983 | 630425  |
| Awati    | LJ-129  | SX           | 34654066 | 33752123 | 97.40 | 9.57  | 87.20 | 65.72 | 965341  | 349940 | 615401  |
|          | LJ-130  | SX           | 35625658 | 35161381 | 98.70 | 10.07 | 85.80 | 63.12 | 969394  | 342634 | 626760  |
|          | LJ-131  | SX           | 43920804 | 43007593 | 97.92 | 11.39 | 92.15 | 78.80 | 986130  | 343182 | 642948  |
|          | LJ-132  | SX           | 46526688 | 45464814 | 97.72 | 12.32 | 87.43 | 67.49 | 955994  | 340578 | 615416  |
|          | LJ-133  | SX           | 47151002 | 45946281 | 97.44 | 12.07 | 89.63 | 71.86 | 981118  | 333061 | 648057  |
|          | LJ-135  | Intermediate | 40684250 | 39792299 | 97.81 | 10.77 | 89.68 | 71.17 | 1082221 | 358594 | 723627  |
|          | LJ-63   | SX           | 45384606 | 44641280 | 98.36 | 12.33 | 86.24 | 67.72 | 995353  | 351139 | 644214  |
|          | LJ-64   | SX           | 42679976 | 41945324 | 98.28 | 11.24 | 89.82 | 72.63 | 984245  | 339053 | 645192  |
|          | LJ-65-c | SX           | 40436052 | 39551503 | 97.81 | 11.18 | 85.65 | 65.17 | 959693  | 356717 | 602976  |
|          | LJ-66   | Intermediate | 44685888 | 43353234 | 97.02 | 11.78 | 88.17 | 68.51 | 1221251 | 387394 | 833857  |
| Bachu    | LJ-67   | Intermediate | 50395522 | 48115789 | 95.48 | 12.57 | 91.16 | 74.12 | 1550561 | 406106 | 1144455 |
|          | LJ-68   | SX           | 38829314 | 38032532 | 97.95 | 10.20 | 89.38 | 69.16 | 971340  | 345892 | 625448  |
|          | LJ-69   | Intermediate | 51342894 | 49140829 | 95.71 | 13.17 | 88.48 | 69.73 | 1548637 | 416949 | 1131688 |
|          | LJ-70   | SX           | 46887800 | 45944660 | 97.99 | 11.93 | 90.70 | 74.90 | 986266  | 334870 | 651396  |
|          | LJ-71   | SX           | 40625448 | 39738187 | 97.82 | 10.95 | 87.38 | 66.40 | 984328  | 346016 | 638312  |
|          | LJ-72   | SX           | 38079356 | 37453229 | 98.36 | 10.29 | 88.16 | 68.24 | 988212  | 351194 | 637018  |
|          | LJ-83   | SX           | 40137248 | 39492461 | 98.39 | 10.84 | 88.49 | 68.71 | 985109  | 339563 | 645546  |
|          | LJ-84   | SX           | 38158874 | 37547250 | 98.40 | 10.15 | 90.44 | 72.92 | 984541  | 344986 | 639555  |
|          | LJ-85   | SX           | 48936576 | 47955383 | 97.99 | 12.48 | 91.81 | 79.43 | 1005307 | 362895 | 642412  |
|          | LJ-86   | Intermediate | 42412512 | 40309603 | 95.04 | 10.63 | 91.39 | 73.42 | 1534092 | 402213 | 1131879 |
|          | LJ-87   | Intermediate | 40422458 | 39113767 | 96.76 | 10.37 | 90.89 | 73.01 | 1234736 | 370838 | 863898  |
| Maigaiti | LJ-88   | Intermediate | 47978250 | 46899205 | 97.75 | 12.51 | 90.79 | 75.67 | 1128462 | 351751 | 776711  |
|          | LJ-89   | SX           | 42672326 | 41736590 | 97.81 | 11.42 | 87.84 | 69.61 | 1043177 | 342934 | 700243  |
|          | LJ-90   | SX           | 45808434 | 44594952 | 97.35 | 11.15 | 90.44 | 73.71 | 991966  | 336340 | 655626  |
|          | LJ-91   | SX           | 49329538 | 48552987 | 98.43 | 12.76 | 89.90 | 74.10 | 979647  | 328531 | 651116  |
|          | LJ-92   | SX           | 43807078 | 42888181 | 97.90 | 11.18 | 90.83 | 74.06 | 963978  | 337063 | 626915  |
|          | LJ-191  | SX           | 41900088 | 41266536 | 98.49 | 11.14 | 89.29 | 71.37 | 994460  | 337143 | 657317  |
|          | LJ-192  | SX           | 45434380 | 44720549 | 98.43 | 11.75 | 91.04 | 76.91 | 989454  | 333667 | 655787  |
|          | LJ-193  | SX           | 48414886 | 47637034 | 98.39 | 12.31 | 91.04 | 76.84 | 997457  | 335422 | 662035  |
| Jiashi   | LJ-194  | SX           | 42838284 | 42161408 | 98.42 | 11.05 | 90.65 | 74.63 | 976976  | 342201 | 634775  |
|          | LJ-195  | SX           | 60447406 | 59320521 | 98.14 | 15.31 | 92.29 | 81.42 | 988155  | 341532 | 646623  |
|          | LJ-196  | SX           | 40059286 | 39349492 | 98.23 | 10.45 | 90.87 | 73.86 | 972399  | 345614 | 626785  |
|          | LJ-197  | SX           | 42688886 | 42080549 | 98.57 | 11.46 | 87.71 | 67.61 | 970188  | 345556 | 624632  |

|             |          |              |          |          |       |       |       |       |         |        |         |
|-------------|----------|--------------|----------|----------|-------|-------|-------|-------|---------|--------|---------|
|             | LJ-198   | SX           | 42894816 | 42132835 | 98.22 | 11.49 | 88.72 | 71.04 | 913332  | 393559 | 519773  |
|             | LJ-199   | SX           | 62530770 | 61310412 | 98.05 | 15.98 | 91.06 | 78.81 | 997411  | 349653 | 647758  |
|             | LJ-200   | SX           | 42487594 | 41849994 | 98.50 | 11.46 | 87.65 | 67.90 | 986729  | 348873 | 637856  |
| Desert road | LJ-254-c | Intermediate | 42845104 | 41393122 | 96.61 | 11.79 | 84.15 | 62.81 | 1537030 | 404871 | 1132159 |
|             | LJ-255   | Intermediate | 47685162 | 46051145 | 96.57 | 12.33 | 87.52 | 64.62 | 1541749 | 403578 | 1138171 |
|             | LJ-256-c | Intermediate | 48116272 | 45878841 | 95.35 | 11.88 | 92.38 | 76.97 | 1548675 | 412505 | 1136170 |
|             | LJ-260-c | SX           | 60471870 | 58751518 | 97.16 | 15.51 | 89.81 | 77.51 | 963184  | 349166 | 614018  |
|             | LJ-266-c | Intermediate | 40262192 | 38667745 | 96.04 | 10.52 | 88.58 | 67.21 | 1541178 | 405394 | 1135784 |
| Pishan      | LJ-33    | SX           | 47030694 | 46329988 | 98.51 | 12.78 | 88.07 | 69.70 | 989640  | 353676 | 635964  |
|             | LJ-34    | SX           | 43534994 | 42702207 | 98.09 | 11.07 | 88.62 | 67.28 | 952056  | 338636 | 613420  |
|             | LJ-35    | Intermediate | 41450494 | 40363087 | 97.38 | 10.89 | 86.99 | 63.60 | 1233397 | 360393 | 873004  |
|             | LJ-36    | SX           | 38423250 | 37632239 | 97.94 | 9.91  | 88.38 | 66.00 | 983479  | 330835 | 652644  |
|             | LJ-37    | SX           | 42318700 | 41479623 | 98.02 | 11.27 | 86.31 | 63.61 | 977798  | 333467 | 644331  |
|             | LJ-38    | SX           | 42769264 | 41923585 | 98.02 | 11.18 | 86.98 | 65.21 | 981022  | 333818 | 647204  |
|             | LJ-39    | SX           | 44239588 | 43351005 | 97.99 | 11.64 | 88.46 | 68.05 | 980324  | 339877 | 640447  |
|             | LJ-40    | SX           | 40150622 | 39384903 | 98.09 | 10.60 | 87.77 | 65.82 | 970337  | 340283 | 630054  |
|             | LJ-41    | SX           | 45028846 | 44001867 | 97.72 | 10.83 | 88.89 | 67.45 | 968203  | 341105 | 627098  |
| Moyu        | LJ-250   | SX           | 60683016 | 59280502 | 97.69 | 15.05 | 92.67 | 83.29 | 971518  | 353234 | 618284  |
|             | LJ-251-c | SX           | 43669854 | 42721171 | 97.83 | 11.90 | 87.37 | 69.43 | 971463  | 327500 | 643963  |
|             | LJ-252   | SX           | 60174518 | 58856833 | 97.81 | 15.24 | 92.28 | 81.36 | 1001826 | 337569 | 664257  |
|             | LJ-253   | SX           | 43613250 | 42866226 | 98.29 | 11.82 | 88.47 | 70.68 | 991478  | 340340 | 651138  |
|             | LJ-258   | SX           | 51831898 | 50605936 | 97.63 | 12.73 | 90.53 | 73.39 | 995223  | 337986 | 657237  |
|             | LJ-259-c | SX           | 42470850 | 41744893 | 98.29 | 11.18 | 89.32 | 71.99 | 975443  | 338880 | 636563  |
|             | LJ-265-c | SX           | 49484806 | 48401714 | 97.81 | 12.79 | 90.95 | 78.22 | 984405  | 348437 | 635968  |
| Minfeng     | LJ-113   | SX           | 36808398 | 36294802 | 98.60 | 10.08 | 88.77 | 70.13 | 976841  | 338558 | 638283  |
|             | LJ-114   | Intermediate | 38113780 | 36427343 | 95.58 | 10.33 | 85.95 | 64.41 | 1494541 | 399711 | 1094830 |
|             | LJ-115   | Intermediate | 36634032 | 34997451 | 95.53 | 9.49  | 89.97 | 68.33 | 1515039 | 394693 | 1120346 |
|             | LJ-116   | Intermediate | 45455662 | 43189747 | 95.02 | 11.11 | 89.03 | 68.96 | 1517625 | 392678 | 1124947 |
|             | LJ-117   | SX           | 34986908 | 33805673 | 96.62 | 9.20  | 91.17 | 73.97 | 978117  | 349439 | 628678  |
|             | LJ-118   | Intermediate | 39114276 | 37917781 | 96.94 | 10.22 | 90.17 | 71.51 | 1256499 | 358264 | 898235  |
|             | LJ-119   | SX           | 39358400 | 37474092 | 95.21 | 10.63 | 87.55 | 67.28 | 968342  | 334254 | 634088  |
|             | LJ-120   | SX           | 35892340 | 34615634 | 96.44 | 9.93  | 86.54 | 64.67 | 974338  | 344815 | 629523  |
|             | LJ-121   | SX           | 44017842 | 43116874 | 97.95 | 11.70 | 89.79 | 73.00 | 991162  | 335642 | 655520  |
|             | LJ-122-c | Intermediate | 38140066 | 36402169 | 95.44 | 9.89  | 88.56 | 66.36 | 1482040 | 398736 | 1083304 |
| Ejina       | LJ-11    | IMGS         | 39303856 | 38615750 | 98.25 | 10.37 | 90.89 | 73.07 | 963860  | 306883 | 656977  |
|             | LJ-12    | IMGS         | 46496542 | 45252178 | 97.32 | 11.64 | 91.11 | 74.22 | 981886  | 310124 | 671762  |
|             | LJ-13    | IMGS         | 37095204 | 36361429 | 98.02 | 10.15 | 88.10 | 65.97 | 960542  | 303583 | 656959  |
|             | LJ-14    | IMGS         | 41415958 | 40694780 | 98.26 | 10.90 | 90.41 | 72.08 | 965862  | 304343 | 661519  |
|             | LJ-15-c  | IMGS         | 45358850 | 44408482 | 97.90 | 11.57 | 91.98 | 78.10 | 976055  | 317650 | 658405  |
|             | LJ-16    | IMGS         | 46718864 | 45601613 | 97.61 | 12.05 | 88.77 | 68.45 | 969478  | 315440 | 654038  |
|             | LJ-17-c  | IMGS         | 47905482 | 46886444 | 97.87 | 11.97 | 92.29 | 78.96 | 984155  | 318402 | 665753  |

|          |          |          |          |          |       |       |       |        |        |        |        |
|----------|----------|----------|----------|----------|-------|-------|-------|--------|--------|--------|--------|
|          | LJ-18-c  | IMGS     | 40138644 | 39408027 | 98.18 | 10.55 | 88.99 | 70.40  | 945115 | 323948 | 621167 |
|          | LJ-19    | IMGS     | 45875268 | 45067326 | 98.24 | 12.10 | 90.68 | 74.27  | 964285 | 309438 | 654847 |
|          | LJ-20    | IMGS     | 36423604 | 35861896 | 98.46 | 10.26 | 86.15 | 63.10  | 972977 | 324859 | 648118 |
|          | LJ-21    | IMGS     | 47061624 | 46147809 | 98.06 | 11.52 | 88.22 | 69.44  | 989982 | 314002 | 675980 |
|          | LJ-22    | IMGS     | 38073512 | 37308835 | 97.99 | 10.26 | 89.61 | 69.34  | 974322 | 319570 | 654752 |
|          | LJ-23    | IMGS     | 37440962 | 36827694 | 98.36 | 10.21 | 88.85 | 67.88  | 980479 | 312682 | 667797 |
|          | LJ-24    | IMGS     | 44839636 | 43985191 | 98.09 | 11.51 | 90.84 | 74.79  | 990439 | 317306 | 673133 |
|          | LJ-25    | IMGS     | 46667052 | 45551019 | 97.61 | 10.94 | 89.23 | 70.94  | 977054 | 322214 | 654840 |
|          | LJ-26    | IMGS     | 36846166 | 36245638 | 98.37 | 10.05 | 89.17 | 68.36  | 953077 | 312972 | 640105 |
|          | LJ-27    | IMGS     | 44726406 | 43675822 | 97.65 | 10.75 | 88.05 | 67.17  | 968926 | 317310 | 651616 |
|          | LJ-28    | IMGS     | 40764596 | 40053604 | 98.26 | 10.84 | 88.18 | 68.50  | 986588 | 319193 | 667395 |
|          | LJ-29    | IMGS     | 46223680 | 45137178 | 97.65 | 11.86 | 89.51 | 71.93  | 991573 | 317050 | 674523 |
|          | LJ-31    | IMGS     | 40543718 | 39865817 | 98.33 | 11.04 | 85.98 | 64.71  | 967327 | 310862 | 656465 |
|          | LJ-32    | IMGS     | 45073228 | 43705778 | 96.97 | 10.83 | 90.58 | 72.76  | 977224 | 319021 | 658203 |
| Dunhuang | LJ-152-c | IMGS     | 49957298 | 48986304 | 98.06 | 13.24 | 89.40 | 74.31  | 997076 | 308548 | 688528 |
|          | LJ-153-c | IMGS     | 48178170 | 47430836 | 98.45 | 12.85 | 88.66 | 71.07  | 992502 | 308031 | 684471 |
|          | LJ-154   | IMGS     | 47825888 | 46814828 | 97.89 | 12.29 | 89.81 | 72.81  | 993365 | 307121 | 686244 |
|          | LJ-155   | IMGS     | 43804858 | 42784031 | 97.67 | 11.09 | 91.22 | 74.64  | 991207 | 308078 | 683129 |
|          | LJ-156   | IMGS     | 42942794 | 41921750 | 97.62 | 10.97 | 90.26 | 70.26  | 989506 | 305120 | 684386 |
| Yumen    | LJ-157   | IMGS     | 46796382 | 46072985 | 98.45 | 12.47 | 88.57 | 69.88  | 973958 | 302329 | 671629 |
|          | LJ-158   | IMGS     | 37253602 | 36732921 | 98.60 | 10.25 | 87.32 | 66.23  | 964023 | 303173 | 660850 |
|          | LJ-159   | IMGS     | 42681646 | 42008751 | 98.42 | 11.63 | 87.21 | 67.90  | 969314 | 303310 | 666004 |
|          | LJ-160   | IMGS     | 44704032 | 43845879 | 98.08 | 11.68 | 88.68 | 68.11  | 970906 | 300015 | 670891 |
|          | LJ-161   | IMGS     | 65024294 | 63765681 | 98.06 | 16.29 | 92.72 | 82.56  | 985538 | 301788 | 683750 |
| Guazhou  | LJ-162   | IMGS     | 45014540 | 44305611 | 98.43 | 11.81 | 90.14 | 74.28  | 987893 | 323479 | 664414 |
|          | LJ-163   | IMGS     | 45672934 | 44737845 | 97.95 | 11.64 | 91.63 | 77.15  | 990727 | 322275 | 668452 |
|          | LJ-164   | IMGS     | 47494858 | 46547265 | 98.00 | 12.04 | 92.22 | 79.72  | 988016 | 323113 | 664903 |
|          | LJ-165   | IMGS     | 45776132 | 44794687 | 97.86 | 11.29 | 88.43 | 68.51  | 972599 | 321073 | 651526 |
|          | LJ-166   | IMGS     | 37926582 | 37276940 | 98.29 | 10.15 | 89.05 | 68.82  | 983497 | 322030 | 661467 |
|          | LJ-167   | IMGS     | 57097470 | 55994505 | 98.07 | 14.38 | 90.71 | 74.91  | 993213 | 327480 | 665733 |
|          | LJ-168   | IMGS     | 45104120 | 44424354 | 98.49 | 11.85 | 88.61 | 69.20  | 952651 | 322952 | 629699 |
|          | LJ-169   | IMGS     | 41852948 | 40966125 | 97.88 | 11.21 | 87.81 | 66.42  | 962002 | 323463 | 638539 |
|          | LJ-170   | IMGS     | 43860278 | 42789797 | 97.56 | 11.35 | 89.56 | 70.83  | 989747 | 322807 | 666940 |
|          | LJ-171   | IMGS     | 38308812 | 37765215 | 98.58 | 10.43 | 87.74 | 66.85  | 969475 | 315992 | 653483 |
|          | LJ-172   | IMGS     | 50154992 | 49221680 | 98.14 | 12.95 | 87.69 | 67.10  | 972689 | 314225 | 658464 |
|          | LJ-173   | IMGS     | 41774272 | 41171314 | 98.56 | 11.41 | 86.06 | 65.45  | 983772 | 316671 | 667101 |
|          | LJ-174   | IMGS     | 44301372 | 43489978 | 98.17 | 11.68 | 87.16 | 63.46  | 981430 | 314264 | 667166 |
|          | LJ-175   | IMGS     | 41915618 | 41232018 | 98.37 | 10.89 | 90.97 | 74.10  | 977582 | 310238 | 667344 |
|          | LJ-177-c | IMGS     | 42711518 | 42086728 | 98.54 | 11.33 | 89.74 | 71.87  | 978685 | 317022 | 661663 |
| LJ-178   | IMGS     | 42919382 | 42124763 | 98.15    | 11.40 | 88.62 | 69.78 | 975426 | 311579 | 663847 |        |
| LJ-179   | IMGS     | 43406442 | 42386095 | 97.65    | 11.30 | 88.34 | 66.62 | 983304 | 318354 | 664950 |        |

|                    |          |                    |          |          |       |       |       |       |         |         |        |
|--------------------|----------|--------------------|----------|----------|-------|-------|-------|-------|---------|---------|--------|
|                    | LJ-262   | IMGS               | 39615702 | 38718146 | 97.73 | 10.34 | 90.20 | 71.71 | 973143  | 314994  | 658149 |
|                    | LJ-263   | IMGS               | 48328500 | 47384382 | 98.05 | 12.27 | 91.92 | 78.37 | 972980  | 306293  | 666687 |
|                    | LJ-267   | IMGS               | 38785366 | 37929556 | 97.79 | 9.92  | 91.19 | 74.09 | 982798  | 323067  | 659731 |
|                    | LJ-45    | QH                 | 46914962 | 46124680 | 98.32 | 12.14 | 89.95 | 72.05 | 1019476 | 316493  | 702983 |
|                    | LJ-46    | QH                 | 39842808 | 39216057 | 98.43 | 10.51 | 89.25 | 69.07 | 1014676 | 315843  | 698833 |
|                    | LJ-47    | QH                 | 41917324 | 41029055 | 97.88 | 10.08 | 91.11 | 72.81 | 1011285 | 316621  | 694664 |
| Golmud             | LJ-48    | QH                 | 44077062 | 43267163 | 98.16 | 11.36 | 90.45 | 72.84 | 1017127 | 316948  | 700179 |
|                    | LJ-49    | QH                 | 40551494 | 39910523 | 98.42 | 10.92 | 88.36 | 66.11 | 1008776 | 317452  | 691324 |
|                    | LJ-50    | QH                 | 50012096 | 49038424 | 98.05 | 11.83 | 91.32 | 75.39 | 1016106 | 315269  | 700837 |
|                    | LJ-51    | QH                 | 40933924 | 40185393 | 98.17 | 10.84 | 88.72 | 68.01 | 1010265 | 317668  | 692597 |
|                    | LJ-243   | <i>P. pruinosa</i> | 56645252 | 52902754 | 93.39 | 14.85 | 82.36 | 65.16 | 1470837 | 997975  | 472862 |
|                    | LJ-244   | <i>P. pruinosa</i> | 62762056 | 58193057 | 92.72 | 16.13 | 84.80 | 71.04 | 1485666 | 1041464 | 444202 |
|                    | LJ-245-c | <i>P. pruinosa</i> | 38265124 | 36072226 | 94.27 | 11.39 | 75.13 | 54.61 | 1472693 | 964220  | 508473 |
|                    | LJ-246   | <i>P. pruinosa</i> | 48628552 | 45187986 | 92.92 | 12.73 | 82.84 | 65.84 | 1474738 | 1010751 | 463987 |
|                    | LJ-247   | <i>P. pruinosa</i> | 41423240 | 38248540 | 92.34 | 11.03 | 82.28 | 63.14 | 1478274 | 990617  | 487657 |
| <i>P. pruinosa</i> | Maigaiti | <i>P. pruinosa</i> | 57917354 | 53008353 | 91.52 | 14.47 | 85.27 | 72.28 | 1482194 | 1020633 | 461561 |
|                    | Jiashi   | <i>P. pruinosa</i> | 63185532 | 58673954 | 92.86 | 16.32 | 84.18 | 70.29 | 1479246 | 1058007 | 421239 |
|                    |          | <i>P. pruinosa</i> | 65715140 | 60405886 | 91.92 | 15.41 | 84.80 | 70.49 | 1484704 | 1015527 | 469177 |
|                    | Buchu    | <i>P. pruinosa</i> | 46383098 | 42631990 | 91.91 | 12.23 | 82.60 | 65.48 | 1482163 | 1015045 | 467118 |
|                    | Awati    | <i>P. pruinosa</i> | 40899912 | 38269589 | 93.57 | 11.01 | 82.91 | 63.74 | 1477657 | 951868  | 525789 |
| Average            |          |                    | 44739145 | 43675914 | 97.67 | 11.64 | 88.99 | 71.03 | 1033098 | 368830  | 664269 |

**Supplemental Table S4** Quantity statistics of SNPs in each annotated category of *P. euphratica* genome and the nucleotide diversity in each category.

| Category            |                | Number of SNPs | $\pi$ (median) ( $\times 10^{-3}$ ) | $\pi$ (average) ( $\times 10^{-3}$ ) |
|---------------------|----------------|----------------|-------------------------------------|--------------------------------------|
| Exonic              | Stop gain      | 1,886          | 0.0105                              | 0.0137                               |
|                     | Stop loss      | 376            | 0.0096                              | 0.0125                               |
|                     | Synonymous     | 182,460        | 0.0999                              | 0.1300                               |
|                     | Non-synonymous | 177,077        | 0.0912                              | 0.1270                               |
| Intronic            |                | 678,802        | 0.3630                              | 0.5190                               |
| Splicing            |                | 1,003          | 0.0099                              | 0.0128                               |
| Upstream            |                | 212,675        | 0.1290                              | 0.1670                               |
| Downstream          |                | 257,236        | 0.1640                              | 0.2050                               |
| Upstream/Downstream |                | 11,565         | 0.0685                              | 0.0888                               |
| Intergenic          |                | 1,631,759      | 0.6350                              | 0.8420                               |
| Total               |                | 3,154,839      | 0.1640                              | 0.3580                               |

**Supplemental Table S5** Validation of 252 SNPs detected by Sanger resequencing.

| Codes | Scaffold codes | Postion | Ref | Alt | Forward primer (5'→3')         | Reverse primer (5'→3')             |
|-------|----------------|---------|-----|-----|--------------------------------|------------------------------------|
| 1     | scaffold2.1    | 4310159 | T   | C   | CTATTTGGTACTAGGTG<br>GTGGAGAT  | AATGCTTGTGAGA<br>ACTAAAAAC<br>CC   |
| 2     | scaffold2.1    | 4310229 | A   | G   |                                |                                    |
| 3     | scaffold2.1    | 4310301 | A   | G   |                                |                                    |
| 4     | scaffold2.1    | 4310470 | T   | G   | GTCTGTATTCATCACCG<br>TAGGCA    | TGCATTTGCTGATT<br>TGTATTATTA<br>CT |
| 5     | scaffold2.1    | 4310541 | A   | T   |                                |                                    |
| 6     | scaffold2.1    | 4310575 | A   | G   |                                |                                    |
| 7     | scaffold2.1    | 4310617 | A   | C   |                                |                                    |
| 8     | scaffold2.1    | 4310679 | T   | G   |                                |                                    |
| 9     | scaffold2.1    | 4310728 | C   | A   |                                |                                    |
| 10    | scaffold2.1    | 4310818 | T   | C   |                                |                                    |
| 11    | scaffold2.1    | 4310891 | T   | C   |                                |                                    |
| 12    | scaffold2.1    | 4310928 | A   | G   |                                |                                    |
| 13    | scaffold2.1    | 4311131 | A   | T   | AATGCAGCAGTTCACCT<br>AGATAAT   | GACAGAACATGTTT<br>CTGTTAATT<br>GG  |
| 14    | scaffold2.1    | 4311239 | T   | A   |                                |                                    |
| 15    | scaffold2.1    | 4311261 | T   | G   |                                |                                    |
| 16    | scaffold2.1    | 4311312 | A   | C   |                                |                                    |
| 17    | scaffold2.1    | 4311407 | T   | A   | GTAGAGCTCCAGAATC<br>TCCACA     | TCAGTAGATTGATG<br>CTCTCTTTT<br>TC  |
| 18    | scaffold2.1    | 4311429 | C   | A   |                                |                                    |
| 19    | scaffold2.1    | 4311514 | G   | C   |                                |                                    |
| 20    | scaffold2.1    | 4311596 | G   | A   |                                |                                    |
| 21    | scaffold2.1    | 4311670 | C   | T   |                                |                                    |
| 22    | scaffold2.1    | 4311679 | A   | T   |                                |                                    |
| 23    | scaffold2.1    | 4312144 | T   | A   | ATACTTTCTTCAGACCA<br>GAGATTCA  | TGCCGTCCTATGTA<br>AATAAGCT<br>G    |
| 24    | scaffold2.1    | 4312155 | C   | T   |                                |                                    |
| 25    | scaffold2.1    | 4312176 | T   | C   |                                |                                    |
| 26    | scaffold2.1    | 4312206 | C   | T   |                                |                                    |
| 27    | scaffold2.1    | 4312379 | G   | A   | AAAGACCAGCTTATTTA<br>CATAGGAC  | TCAAGTTTGAGAACT<br>TGCATGT<br>GTA  |
| 28    | scaffold2.1    | 4312380 | G   | C   |                                |                                    |
| 29    | scaffold2.1    | 4312406 | A   | G   |                                |                                    |
| 30    | scaffold2.1    | 4312466 | T   | A   |                                |                                    |
| 31    | scaffold2.1    | 4312475 | T   | A   |                                |                                    |
| 32    | scaffold2.1    | 4312551 | A   | C   |                                |                                    |
| 33    | scaffold2.1    | 4312724 | A   | G   | GATAAAAAAAGAAGGT<br>CGAGAAATG  | CCATTCAAGTGACAG<br>GAATTAC<br>T    |
| 34    | scaffold2.1    | 4312734 | A   | C   |                                |                                    |
| 35    | scaffold2.1    | 4312735 | T   | A   |                                |                                    |
| 36    | scaffold2.1    | 4312826 | G   | A   |                                |                                    |
| 37    | scaffold2.1    | 4312833 | T   | C   |                                |                                    |
| 38    | scaffold2.1    | 4314108 | C   | A   | AGTTTTTTTCAGCTTTCC<br>GAGTG    | CAATGAGACTGTCT<br>GGGTGGA          |
| 39    | scaffold2.1    | 4314143 | A   | G   |                                |                                    |
| 40    | scaffold2.1    | 4314229 | A   | G   |                                |                                    |
| 41    | scaffold2.1    | 4314444 | T   | C   | TTATTCAAGTAAACTCA<br>AACCAACAT | TGGTAAGTATCTTCCA<br>AATTACT<br>TC  |
| 42    | scaffold2.1    | 4314649 | C   | T   |                                |                                    |
| 43    | scaffold2.1    | 4314679 | T   | G   |                                |                                    |
| 44    | scaffold2.1    | 4314682 | A   | G   |                                |                                    |
| 45    | scaffold2.1    | 4314693 | C   | T   |                                |                                    |
| 46    | scaffold2.1    | 4314731 | C   | T   |                                |                                    |
| 47    | scaffold31.1   | 2891025 | A   | G   | AAGAGTGAAGAGAATG<br>ATCAAAAAGA | CCTGATCTTTCCTT<br>CTTATAGGA<br>TG  |
| 48    | scaffold31.1   | 2891027 | A   | C   |                                |                                    |
| 49    | scaffold43.1   | 818193  | C   | T   | ATGCCATTTTCATTTC<br>TAGTGTCT   | TTCATATATTCACACT<br>AGCTTTG<br>CA  |
| 50    | scaffold43.1   | 818274  | G   | A   |                                |                                    |
| 51    | scaffold43.1   | 818353  | T   | A   |                                |                                    |
| 52    | scaffold43.1   | 818363  | G   | C   |                                |                                    |
| 53    | scaffold43.1   | 818448  | T   | C   |                                |                                    |
| 54    | scaffold43.1   | 818470  | G   | T   |                                |                                    |
| 55    | scaffold43.1   | 818845  | A   | T   |                                |                                    |
| 56    | scaffold43.1   | 818871  | T   | C   |                                |                                    |
| 57    | scaffold43.1   | 818941  | A   | G   | TCATCGGTTGAATGTAA<br>CTTCTTTG  | AATTGAAACCACTC<br>ACACGGAT         |
| 58    | scaffold43.1   | 818944  | A   | G   |                                |                                    |
| 59    | scaffold43.1   | 818958  | G   | T   |                                |                                    |
| 60    | scaffold43.1   | 819081  | G   | A   |                                |                                    |
| 61    | scaffold43.1   | 819186  | A   | T   |                                |                                    |



|     |              |        |   |   |                    |                         |
|-----|--------------|--------|---|---|--------------------|-------------------------|
| 62  | scaffold43.1 | 819232 | A | G |                    |                         |
| 63  | scaffold43.1 | 819242 | A | G |                    |                         |
| 64  | scaffold43.1 | 819333 | G | A |                    |                         |
| 65  | scaffold43.1 | 819545 | G | A |                    |                         |
| 66  | scaffold43.1 | 819553 | G | A |                    |                         |
| 67  | scaffold43.1 | 819654 | T | C |                    |                         |
| 68  | scaffold43.1 | 819663 | A | T | AGCCTTGAAGGGAATC   | TCCTGATAATATTGGAAGATGC  |
| 69  | scaffold43.1 | 819691 | G | A | AGTGG              | A                       |
| 70  | scaffold43.1 | 819739 | T | C |                    |                         |
| 71  | scaffold43.1 | 819803 | G | C |                    |                         |
| 72  | scaffold43.1 | 819827 | G | A |                    |                         |
| 73  | scaffold43.1 | 819885 | G | A |                    |                         |
| 74  | scaffold43.1 | 819886 | C | T |                    |                         |
| 75  | scaffold43.1 | 819940 | A | T |                    |                         |
| 76  | scaffold43.1 | 819967 | G | A |                    |                         |
| 77  | scaffold43.1 | 819986 | G | A | ATTGTAAACTTGCCATC  | CACCAGATAAAAATACAACATTC |
| 78  | scaffold43.1 | 819988 | G | A | CCAG               | CAT                     |
| 79  | scaffold43.1 | 820048 | T | C |                    |                         |
| 80  | scaffold43.1 | 820107 | C | T |                    |                         |
| 81  | scaffold43.1 | 820160 | T | A |                    |                         |
| 82  | scaffold43.1 | 820173 | A | T |                    |                         |
| 83  | scaffold43.1 | 820630 | T | A |                    |                         |
| 84  | scaffold43.1 | 820690 | T | G | TCTGTTTTATTTTTATTC | TTTCATCCTACGTTTCTCCCA   |
| 85  | scaffold43.1 | 820820 | G | A | TTGGCAT            |                         |
| 86  | scaffold45.1 | 209103 | A | G |                    |                         |
| 87  | scaffold45.1 | 209142 | A | C |                    |                         |
| 88  | scaffold45.1 | 209176 | T | G |                    |                         |
| 89  | scaffold45.1 | 209212 | C | T | AAAAAGCATGAGTTTA   | TTGAAACTAAAAATGCTGTAA   |
| 90  | scaffold45.1 | 209214 | G | A | TAGGTTGG           | AAT                     |
| 91  | scaffold45.1 | 209272 | C | A |                    |                         |
| 92  | scaffold45.1 | 209307 | T | A |                    |                         |
| 93  | scaffold45.1 | 209569 | C | G |                    |                         |
| 94  | scaffold45.1 | 209595 | G | C |                    |                         |
| 95  | scaffold45.1 | 209624 | C | G | AACCGCTCTCCTCTCAT  | TTTTATTTTCTCTGTTTTTTGGG |
| 96  | scaffold45.1 | 209691 | A | C | CATTATA            |                         |
| 97  | scaffold45.1 | 209699 | C | T |                    |                         |
| 98  | scaffold45.1 | 209835 | G | A | CTTTGATGGACCAAGCC  | TAAGGGTTTAGGGTTTATTTTC  |
| 99  | scaffold45.1 | 209875 | G | T | TACAC              | AC                      |
| 100 | scaffold57.1 | 294690 | T | C |                    |                         |
| 101 | scaffold57.1 | 294692 | G | C |                    |                         |
| 102 | scaffold57.1 | 294746 | A | G |                    |                         |
| 103 | scaffold57.1 | 294827 | G | T | TTTGGTTAATACTTTGG  | GCATAATGCCAAAATGTTCTAA  |
| 104 | scaffold57.1 | 294898 | C | A | ATGTGGTT           | GG                      |
| 105 | scaffold57.1 | 294995 | A | C |                    |                         |
| 106 | scaffold57.1 | 295025 | T | G |                    |                         |
| 107 | scaffold57.1 | 295938 | A | C |                    |                         |
| 108 | scaffold57.1 | 296000 | G | A | CCACAAGGATATGCTG   | CACAAAACAGGCTACCGCAT    |
| 109 | scaffold57.1 | 296048 | A | G | TTAAAAC            |                         |
| 110 | scaffold57.1 | 296051 | A | G |                    |                         |
| 111 | scaffold70.1 | 181674 | T | G |                    |                         |
| 112 | scaffold70.1 | 181743 | A | G |                    |                         |
| 113 | scaffold70.1 | 181967 | C | T | TGCCTCAACTCTCTCCC  | ACTTTTCTTTTGCATTTACCTGG |
| 114 | scaffold70.1 | 181976 | G | A | CTG                | T                       |
| 115 | scaffold70.1 | 181986 | G | A |                    |                         |
| 116 | scaffold70.1 | 182456 | C | T |                    |                         |
| 117 | scaffold70.1 | 182474 | A | G |                    |                         |
| 118 | scaffold70.1 | 182516 | T | A | ACTTTTCTTTTGCATTT  | GTGGGTGGTTATACATGAAACT  |
| 119 | scaffold70.1 | 182538 | T | C | ACCTGGT            | CTT                     |
| 120 | scaffold70.1 | 182571 | A | G |                    |                         |
| 121 | scaffold70.1 | 182586 | G | A |                    |                         |
| 122 | scaffold70.1 | 184325 | C | A |                    |                         |
| 123 | scaffold70.1 | 184347 | A | G |                    |                         |
| 124 | scaffold70.1 | 184505 | T | A | TAAATCAAAAGCTACC   | AGAGAAATTATTGAGTAGGAGA  |
| 125 | scaffold70.1 | 184575 | A | G | AGCAACAAA          | CC                      |
| 126 | scaffold70.1 | 184632 | T | A |                    |                         |

|     |               |         |   |   |                               |                               |
|-----|---------------|---------|---|---|-------------------------------|-------------------------------|
| 127 | scaffold78.1  | 1139218 | C | T |                               |                               |
| 128 | scaffold78.1  | 1139256 | A | G |                               |                               |
| 129 | scaffold78.1  | 1139297 | T | G |                               |                               |
| 130 | scaffold78.1  | 1139362 | A | G | TCGTACCTTTTCCTTTTT            | CTTCAACTTCTGCTGCTGCTG         |
| 131 | scaffold78.1  | 1139403 | G | A | GTTTTAT                       |                               |
| 132 | scaffold78.1  | 1139413 | T | G |                               |                               |
| 133 | scaffold78.1  | 1139485 | G | A |                               |                               |
| 134 | scaffold78.1  | 1139491 | A | G |                               |                               |
| 135 | scaffold96.1  | 262078  | C | A | TAAACTATTATTGTCAA<br>CTGTCGAT | GCATGCTAAGATGTCATGACAC<br>TAT |
| 136 | scaffold101.1 | 894693  | G | A | TAGATCTTATCAAGCTT<br>CTCTGCCT | CTGTAGAGGTGAAAATCATTTC<br>CAC |
| 137 | scaffold138.1 | 54638   | T | G |                               |                               |
| 138 | scaffold138.1 | 54645   | C | G |                               |                               |
| 139 | scaffold138.1 | 54840   | C | T | CCGCCAGGTACTTTGCA             | AATTTCAAATCTTTGAAACAAC        |
| 140 | scaffold138.1 | 54841   | T | C | ATT                           | AAA                           |
| 141 | scaffold138.1 | 55042   | T | C |                               |                               |
| 142 | scaffold138.1 | 55048   | T | A |                               |                               |
| 143 | scaffold138.1 | 55536   | T | C | TAAGTGTGTTTTCTTT              | ATAATGGACAGATGACAACAAT        |
| 144 | scaffold138.1 | 55553   | G | T | TAGGCTG                       | GAC                           |
| 145 | scaffold170.1 | 399454  | A | G |                               |                               |
| 146 | scaffold170.1 | 399540  | G | A |                               |                               |
| 147 | scaffold170.1 | 399577  | C | T |                               |                               |
| 148 | scaffold170.1 | 399622  | G | A | GCTGTCTTGACATCCTT             | TCTTGGTCTTTCTTGACATGAC        |
| 149 | scaffold170.1 | 399624  | C | T | CTGAA                         | TA                            |
| 150 | scaffold170.1 | 399673  | G | A |                               |                               |
| 151 | scaffold170.1 | 399688  | A | G |                               |                               |
| 152 | scaffold170.1 | 399713  | G | T |                               |                               |
| 153 | scaffold170.1 | 399793  | A | T |                               |                               |
| 154 | scaffold170.1 | 399813  | A | G |                               |                               |
| 155 | scaffold170.1 | 399875  | G | A |                               |                               |
| 156 | scaffold170.1 | 399889  | T | C |                               |                               |
| 157 | scaffold170.1 | 399909  | G | A |                               |                               |
| 158 | scaffold170.1 | 399953  | G | C | AGGGACAGCTATAGTT              | CAATTATACTTGGTAGTTTCATG       |
| 159 | scaffold170.1 | 400035  | A | G | CCGAGTA                       | GC                            |
| 160 | scaffold170.1 | 400060  | G | C |                               |                               |
| 161 | scaffold170.1 | 400071  | T | C |                               |                               |
| 162 | scaffold170.1 | 400081  | T | C |                               |                               |
| 163 | scaffold170.1 | 400110  | C | T |                               |                               |
| 164 | scaffold170.1 | 400187  | A | C |                               |                               |
| 165 | scaffold170.1 | 400223  | A | G |                               |                               |
| 166 | scaffold170.1 | 400291  | G | C |                               |                               |
| 167 | scaffold170.1 | 400321  | A | G | TTTCAACAAATAAACC              | TAAAGGACAGAGAGAGAGAGA         |
| 168 | scaffold170.1 | 400523  | T | C | ATTCGTC                       | GCTA                          |
| 169 | scaffold170.1 | 400542  | C | T |                               |                               |
| 170 | scaffold170.1 | 400574  | G | A |                               |                               |
| 171 | scaffold170.1 | 401356  | A | G |                               |                               |
| 172 | scaffold170.1 | 401359  | T | A |                               |                               |
| 173 | scaffold170.1 | 401372  | C | A |                               |                               |
| 174 | scaffold170.1 | 401384  | T | C |                               |                               |
| 175 | scaffold170.1 | 401473  | T | A | TTTGAGTGAATATTCCT             | AGAGAGTTGACCTTGTTTGAAA        |
| 176 | scaffold170.1 | 401486  | C | T | GGACAGTA                      | TAA                           |
| 177 | scaffold170.1 | 401647  | G | A |                               |                               |
| 178 | scaffold170.1 | 401653  | G | T |                               |                               |
| 179 | scaffold170.1 | 401716  | G | T |                               |                               |
| 180 | scaffold190.1 | 264669  | C | T |                               |                               |
| 181 | scaffold190.1 | 264670  | C | T |                               |                               |
| 182 | scaffold190.1 | 264773  | C | G |                               |                               |
| 183 | scaffold190.1 | 264820  | G | T |                               |                               |
| 184 | scaffold190.1 | 264841  | G | A | TCATTTGAACTCTCTCT             | GAATCAATCCTAGATGCTAAGG        |
| 185 | scaffold190.1 | 265007  | C | G | AAAACATC                      | ATT                           |
| 186 | scaffold190.1 | 265021  | G | A |                               |                               |
| 187 | scaffold190.1 | 266121  | A | C |                               |                               |
| 188 | scaffold190.1 | 266165  | A | G |                               |                               |
| 189 | scaffold190.1 | 266232  | G | A |                               |                               |

|     |               |        |   |   |                   |                         |
|-----|---------------|--------|---|---|-------------------|-------------------------|
| 190 | scaffold190.1 | 266373 | A | T |                   |                         |
| 191 | scaffold190.1 | 266415 | T | C |                   |                         |
| 192 | scaffold190.1 | 266562 | A | G |                   |                         |
| 193 | scaffold190.1 | 266713 | A | T | TGGCACCTTCGACTGTG | CTTGGGAGTTCTTCGACAATACT |
| 194 | scaffold190.1 | 266866 | C | T | TTGATC            | TT                      |
| 195 | scaffold190.1 | 266904 | G | A |                   |                         |
| 196 | scaffold226.1 | 506540 | T | G |                   |                         |
| 197 | scaffold226.1 | 506609 | T | G | AGGAGAAAGTAAGTCT  | AAAACCTTAGCATTTTACAAACA |
| 198 | scaffold226.1 | 506627 | C | A | AAGAGG            | AGC                     |
| 199 | scaffold226.1 | 507165 | A | C |                   |                         |
| 200 | scaffold226.1 | 507241 | T | A |                   |                         |
| 201 | scaffold226.1 | 507387 | A | G |                   |                         |
| 202 | scaffold226.1 | 507408 | C | T |                   |                         |
| 203 | scaffold226.1 | 507435 | C | T | CAGGTGGAGTGGAAT   | GGACCTTGTGGAATTGTCTATTA |
| 204 | scaffold226.1 | 507531 | T | G | GGGAGTAGG         | GT                      |
| 205 | scaffold226.1 | 507609 | G | C |                   |                         |
| 206 | scaffold226.1 | 507680 | G | T |                   |                         |
| 207 | scaffold226.1 | 507706 | T | C |                   |                         |
| 208 | scaffold226.1 | 507723 | G | A |                   |                         |
| 209 | scaffold226.1 | 508404 | G | T |                   |                         |
| 210 | scaffold226.1 | 508466 | C | T |                   |                         |
| 211 | scaffold226.1 | 508471 | A | C |                   |                         |
| 212 | scaffold226.1 | 508539 | G | A |                   |                         |
| 213 | scaffold226.1 | 508559 | T | G | CAAGGTGAAGATGCAC  | GTTATTCTTGCCTCCTCACTCTA |
| 214 | scaffold226.1 | 508621 | G | A | TCCTACTCC         | CA                      |
| 215 | scaffold226.1 | 508725 | G | A |                   |                         |
| 216 | scaffold226.1 | 508822 | A | G |                   |                         |
| 217 | scaffold226.1 | 509116 | T | C |                   |                         |
| 218 | scaffold226.1 | 513177 | A | T |                   |                         |
| 219 | scaffold226.1 | 513184 | C | T |                   |                         |
| 220 | scaffold226.1 | 513228 | T | C |                   |                         |
| 221 | scaffold226.1 | 513291 | T | C | AAAGAATTCGGGTATTT | GATTCAGCAACATCTACAGAT   |
| 222 | scaffold226.1 | 513772 | T | A | AAAAGTGG          | CGA                     |
| 223 | scaffold226.1 | 513842 | T | C |                   |                         |
| 224 | scaffold226.1 | 513866 | C | A |                   |                         |
| 225 | scaffold226.1 | 516460 | A | T |                   |                         |
| 226 | scaffold226.1 | 516477 | C | A |                   |                         |
| 227 | scaffold226.1 | 516530 | A | G |                   |                         |
| 228 | scaffold226.1 | 516776 | T | A | ATTTGTCCTCGAACTAT | AAACATTAAGCACTGCAGACCT  |
| 229 | scaffold226.1 | 516795 | T | C | GAAACCAG          | ATA                     |
| 230 | scaffold226.1 | 516825 | A | C |                   |                         |
| 231 | scaffold226.1 | 516826 | T | G |                   |                         |
| 232 | scaffold344.1 | 136940 | G | C |                   |                         |
| 233 | scaffold344.1 | 137011 | G | A | TCAAATGTTCTCTTTT  | CTGTGAATCACCCTTGTATGTG  |
| 234 | scaffold344.1 | 137171 | G | A | TTTTAGTC          | TT                      |
| 235 | scaffold597.1 | 69588  | G | A |                   |                         |
| 236 | scaffold597.1 | 69623  | C | T |                   |                         |
| 237 | scaffold597.1 | 69624  | A | G | ACTTCGACACTCCTGCA | AAGGAAAAAGTTTTAATCTGAT  |
| 238 | scaffold597.1 | 69789  | T | C | CTTG              | GGT                     |
| 239 | scaffold597.1 | 69851  | C | T |                   |                         |
| 240 | scaffold597.1 | 69886  | C | A |                   |                         |
| 241 | scaffold597.1 | 70015  | C | T |                   |                         |
| 242 | scaffold597.1 | 70034  | T | C |                   |                         |
| 243 | scaffold597.1 | 70096  | T | A |                   |                         |
| 244 | scaffold597.1 | 70100  | T | A |                   |                         |
| 245 | scaffold597.1 | 70148  | C | T |                   |                         |
| 246 | scaffold597.1 | 70209  | T | A | CATACTTGCATTTAAGG | TTGTTTGGTGATGGCATGAG    |
| 247 | scaffold597.1 | 70214  | A | G | GAATTTG           |                         |
| 248 | scaffold597.1 | 70298  | G | C |                   |                         |
| 249 | scaffold597.1 | 70314  | T | C |                   |                         |
| 250 | scaffold597.1 | 70418  | A | G |                   |                         |
| 251 | scaffold597.1 | 70431  | T | C |                   |                         |
| 252 | scaffold597.1 | 70443  | T | A |                   |                         |

**Supplemental Table S6** Genetic diversity analysis of *P. pruinosa* and different clusters of *P. euphratica*.

| Population           | $\pi (\times 10^{-3})$ | $\theta_w (\times 10^{-3})$ |
|----------------------|------------------------|-----------------------------|
| <i>P. pruinosa</i>   | 0.931                  | 0.965                       |
| Intermediate cluster | 1.977                  | 1.415                       |
| SX cluster           | 1.351                  | 0.939                       |
| NX cluster           | 1.318                  | 0.966                       |
| <i>P. euphratica</i> |                        |                             |
| IMGS cluster         | 1.400                  | 0.986                       |
| QH cluster           | 0.828                  | 0.525                       |
| All                  | 1.430                  | 0.869                       |

**Supplemental Table S7** Pairwise  $F_{ST}$  values among *P. pruinosa* and different clusters of *P. euphratica*.

|                      | <i>P. pruinosa</i> | Intermediate cluster | SX cluster | NX cluster | IMGS cluster | QH cluster |
|----------------------|--------------------|----------------------|------------|------------|--------------|------------|
| <i>P. pruinosa</i>   | -                  |                      |            |            |              |            |
| Intermediate cluster | 0.154              | -                    |            |            |              |            |
| SX cluster           | 0.326              | 0.182                | -          |            |              |            |
| NX cluster           | 0.331              | 0.174                | 0.097      | -          |              |            |
| IMGS cluster         | 0.318              | 0.150                | 0.043      | 0.044      | -            |            |
| QH cluster           | 0.515              | 0.175                | 0.110      | 0.160      | 0.123        | -          |

**Supplemental Table S8** LD decay analysis of *P. pruinosa* and different clusters of *P. euphratica* measured by  $r^2$ .

|             | <i>P. pruinosa</i> | Intermediate cluster | SX cluster | NX cluster | IMGS cluster | QH cluster | <i>P. euphratica</i> (total of four clusters) |
|-------------|--------------------|----------------------|------------|------------|--------------|------------|-----------------------------------------------|
| $r^2 = 0.2$ | 341 Kb             | NA                   | 15.9 Kb    | 10.8 Kb    | 8.5 Kb       | NA         | 2.6 Kb                                        |
| max/2       | 182 Kb             | NA                   | 13.4 Kb    | 8.7 Kb     | 11.1 Kb      | NA         | 5.6 Kb                                        |
| (min+max)/2 | 17.7 Kb            | 3 Kb                 | 4.9 Kb     | 3.3 Kb     | 4.1 Kb       | 0.3 kb     | 4.6 Kb                                        |

**Supplemental Table S9** Inferred parameters estimates with 95% confidence intervals for the best-fitting demographic scenario modelled in *fastsimcoal2*.

| Parameters | Point estimation | 95% confidence intervals |             |
|------------|------------------|--------------------------|-------------|
|            |                  | Lower bound              | Upper bound |
| NNX        | 155110           | 154033                   | 163710      |
| NIMGS      | 115074           | 104479                   | 119813      |
| NQH        | 15053            | 104479                   | 119813      |
| NSX        | 114931           | 109149                   | 115088      |
| TDIV       | 2028945          | 1997973                  | 2035805     |
| TBQ        | 548505           | 526090                   | 549668      |
| TBM        | 181935           | 181246                   | 188549      |
| mIMGSNX    | 6.01956E-06      | 5.28588E-06              | 8.46774E-06 |
| mQHNX      | 4.30705E-06      | 3.57541E-06              | 5.55473E-06 |
| mSXNX      | 4.27641E-06      | 3.53606E-06              | 4.57879E-06 |
| nNXIMGS    | 0.0081548        | 0.007891012              | 0.008212062 |
| mQHIMGS    | 7.29261E-08      | 6.72137E-08              | 7.88654E-08 |
| mSXIMGS    | 0.0073563        | 0.007013879              | 0.007362005 |
| mNXQH      | 2.05831E-06      | 1.73548E-06              | 2.69732E-06 |
| mIMGSQH    | 0.000200319      | 0.000191155              | 0.000225289 |
| mSXQH      | 5.62428E-05      | 4.69348E-05              | 6.15104E-05 |
| mNXSX      | 6.62709E-06      | 5.14223E-06              | 6.54832E-06 |
| mIMGSSX    | 0.000025105      | 2.22995E-05              | 2.54392E-05 |
| mQHSX      | 1.88742E-05      | 1.82753E-05              | 2.28269E-05 |
| R1         | 0.000144547      | 0.000138212              | 0.000144625 |
| R2         | 0.000215955      | 0.000213181              | 0.00022811  |
| R3         | 0.000103498      | 0.000103191              | 0.000104249 |
| R4         | 2.78641E-05      | 2.78103E-05              | 2.86921E-05 |

**Supplemental Table S10** Seed germination rates of *P. euphratica* and *P. pruinosa* under five NaCl conditions.

| Population | Sample   | 0 mmol/L (%) | 50 mmol/L (%) | GRI in 50 mmol/L (%) | 100 mmol/L (%) | GRI in 100 mmol/L (%) | 150 mmol/L (%) | GRI in 150 mmol/L (%) | 200 mmol/L (%) | GRI in 200 mmol/L (%) | 250 mmol/L (%) | GRI in 250 mmol/L (%) |
|------------|----------|--------------|---------------|----------------------|----------------|-----------------------|----------------|-----------------------|----------------|-----------------------|----------------|-----------------------|
| Wusu       | LJ-201   | 21.00        | 14.67         | 69.84                | 9.67           | 46.03                 | 6.33           | 30.16                 | 4.67           | 22.22                 | 2.33           | 11.11                 |
|            | LJ-202   | 20.00        | 17.67         | 88.33                | 15.00          | 75.00                 | 10.00          | 50.00                 | 6.00           | 30.00                 | 3.67           | 18.33                 |
|            | LJ-203   | 5.67         | 1.67          | 29.41                | 0.67           | 11.76                 | 0.00           | 0.00                  | 0.00           | 0.00                  | 0.00           | 0.00                  |
|            | LJ-204   | 11.67        | 8.33          | 71.43                | 5.67           | 48.57                 | 3.67           | 31.43                 | 1.67           | 14.29                 | 0.33           | 2.86                  |
|            | LJ-205   | 12.00        | 8.67          | 72.22                | 6.33           | 52.78                 | 3.33           | 27.78                 | 1.67           | 13.89                 | 1.33           | 11.11                 |
|            | LJ-206   | 33.67        | 28.00         | 83.17                | 20.33          | 60.40                 | 19.33          | 57.43                 | 15.33          | 45.54                 | 13.00          | 38.61                 |
|            | LJ-207-c | 24.33        | 16.67         | 68.49                | 12.00          | 49.32                 | 8.67           | 35.62                 | 6.67           | 27.40                 | 4.33           | 17.81                 |
|            | LJ-208   | 39.67        | 32.33         | 81.51                | 19.00          | 47.90                 | 15.00          | 37.82                 | 12.33          | 31.09                 | 9.67           | 24.37                 |
|            | LJ-209   | 16.00        | 11.00         | 68.75                | 5.33           | 33.33                 | 3.33           | 20.83                 | 2.00           | 12.50                 | 1.33           | 8.33                  |
|            | LJ-210   | 1.33         | 1.00          | 75.00                | 0.67           | 50.00                 | 0.33           | 25.00                 | 0.33           | 25.00                 | 0.00           | 0.00                  |
| Beiwucha   | LJ-211-c | 7.67         | 6.33          | 82.61                | 4.67           | 60.87                 | 3.00           | 39.13                 | 1.33           | 17.39                 | 0.33           | 4.35                  |
|            | LJ-212   | 6.67         | 4.67          | 70.00                | 3.00           | 45.00                 | 1.67           | 25.00                 | 1.33           | 20.00                 | 0.67           | 10.00                 |
|            | LJ-213   | 44.33        | 41.67         | 93.98                | 30.33          | 68.42                 | 17.33          | 39.10                 | 10.00          | 22.56                 | 4.67           | 10.53                 |
|            | LJ-214   | 15.33        | 11.00         | 71.74                | 7.00           | 45.65                 | 4.33           | 28.26                 | 2.67           | 17.39                 | 1.33           | 8.70                  |
|            | LJ-215   | 9.33         | 5.00          | 53.57                | 2.67           | 28.57                 | 1.33           | 14.29                 | 0.67           | 7.14                  | 0.33           | 3.57                  |
|            | LJ-216   | 42.67        | 32.67         | 76.56                | 19.67          | 46.09                 | 12.33          | 28.91                 | 7.33           | 17.19                 | 5.33           | 12.50                 |
|            | LJ-217   | 13.00        | 8.00          | 61.54                | 6.67           | 51.28                 | 4.67           | 35.90                 | 2.67           | 20.51                 | 2.00           | 15.38                 |
|            | LJ-218   | 2.33         | 1.33          | 57.14                | 1.00           | 42.86                 | 0.67           | 28.57                 | 0.00           | 0.00                  | 0.00           | 0.00                  |
|            | LJ-219-c | 70.67        | 60.67         | 85.85                | 48.00          | 67.92                 | 41.67          | 58.96                 | 39.33          | 55.66                 | 29.33          | 41.51                 |
|            | LJ-220   | 33.67        | 26.00         | 77.23                | 17.00          | 50.50                 | 9.67           | 28.71                 | 6.67           | 19.80                 | 4.33           | 12.87                 |
| Laolonghe  | LJ-221   | 31.33        | 25.00         | 79.79                | 18.67          | 59.57                 | 17.00          | 54.26                 | 14.67          | 46.81                 | 8.33           | 26.60                 |
|            | LJ-222-c | 38.33        | 28.67         | 74.78                | 24.67          | 64.35                 | 23.00          | 60.00                 | 20.00          | 52.17                 | 18.67          | 48.70                 |
|            | LJ-223   | 23.00        | 18.33         | 79.71                | 12.67          | 55.07                 | 8.67           | 37.68                 | 7.00           | 30.43                 | 3.67           | 15.94                 |
|            | LJ-224   | 70.67        | 65.00         | 91.98                | 54.00          | 76.42                 | 42.00          | 59.43                 | 32.33          | 45.75                 | 28.33          | 40.09                 |
|            | LJ-225-c | 38.67        | 28.00         | 72.41                | 22.00          | 56.90                 | 18.67          | 48.28                 | 15.33          | 39.66                 | 9.33           | 24.14                 |
|            | LJ-226   | 37.33        | 28.67         | 76.79                | 16.67          | 44.64                 | 9.00           | 24.11                 | 6.33           | 16.96                 | 3.00           | 8.04                  |
|            | LJ-227   | 34.67        | 22.67         | 65.38                | 17.00          | 49.04                 | 14.33          | 41.35                 | 13.33          | 38.46                 | 10.00          | 28.85                 |
|            | LJ-228   | 15.33        | 10.00         | 65.22                | 7.33           | 47.83                 | 4.67           | 30.43                 | 3.33           | 21.74                 | 1.67           | 10.87                 |
|            | LJ-229   | 57.00        | 38.33         | 67.25                | 28.00          | 49.12                 | 20.00          | 35.09                 | 16.33          | 28.65                 | 8.33           | 14.62                 |
|            | LJ-230   | 16.33        | 9.00          | 55.10                | 7.33           | 44.90                 | 6.33           | 38.78                 | 3.67           | 22.45                 | 2.67           | 16.33                 |
| Qiemo      | LJ-93    | 26.33        | 17.33         | 65.82                | 11.33          | 43.04                 | 8.33           | 31.65                 | 4.67           | 17.72                 | 3.67           | 13.92                 |
|            | LJ-94    | 60.67        | 48.00         | 79.12                | 32.33          | 53.30                 | 16.33          | 26.92                 | 8.00           | 13.19                 | 3.33           | 5.49                  |
|            | LJ-95    | 13.00        | 10.33         | 79.49                | 4.00           | 30.77                 | 2.33           | 17.95                 | 1.00           | 7.69                  | 0.67           | 5.13                  |
|            | LJ-96    | 32.33        | 27.67         | 85.57                | 15.67          | 48.45                 | 8.33           | 25.77                 | 5.00           | 15.46                 | 2.00           | 6.19                  |
|            | LJ-97    | 51.33        | 37.00         | 72.08                | 30.00          | 58.44                 | 19.33          | 37.66                 | 11.33          | 22.08                 | 6.67           | 12.99                 |
|            | LJ-98    | 42.00        | 20.33         | 48.41                | 11.00          | 26.19                 | 7.00           | 16.67                 | 4.33           | 10.32                 | 2.67           | 6.35                  |
|            | LJ-99    | 56.00        | 31.67         | 56.55                | 21.33          | 38.10                 | 12.67          | 22.62                 | 8.67           | 15.48                 | 6.33           | 11.31                 |
|            | LJ-100   | 84.67        | 78.00         | 92.13                | 63.00          | 74.41                 | 51.67          | 61.02                 | 38.67          | 45.67                 | 25.67          | 30.31                 |
|            | LJ-101-c | 69.67        | 49.00         | 70.33                | 38.33          | 55.02                 | 26.00          | 37.32                 | 20.67          | 29.67                 | 14.33          | 20.57                 |



|                                            |          |       |       |       |       |       |       |       |       |       |       |       |
|--------------------------------------------|----------|-------|-------|-------|-------|-------|-------|-------|-------|-------|-------|-------|
|                                            | LJ-102   | 58.00 | 47.33 | 81.61 | 38.33 | 66.09 | 26.00 | 44.83 | 19.33 | 33.33 | 15.00 | 25.86 |
|                                            | LJ-269   | 16.00 | 10.33 | 64.58 | 5.67  | 35.42 | 4.00  | 25.00 | 3.33  | 20.83 | 2.67  | 16.67 |
| Ruoqiang                                   | LJ-103   | 19.67 | 10.33 | 52.54 | 6.67  | 33.90 | 3.67  | 18.64 | 0.67  | 3.39  | 0.00  | 0.00  |
|                                            | LJ-105   | 3.67  | 2.67  | 72.73 | 1.67  | 45.45 | 1.33  | 36.36 | 1.00  | 27.27 | 0.67  | 18.18 |
|                                            | LJ-106   | 18.33 | 13.33 | 72.73 | 9.33  | 50.91 | 5.67  | 30.91 | 4.67  | 25.45 | 2.00  | 10.91 |
|                                            | LJ-107   | 66.33 | 49.33 | 74.37 | 43.00 | 64.82 | 33.33 | 50.25 | 28.67 | 43.22 | 21.67 | 32.66 |
|                                            | LJ-108   | 12.00 | 10.00 | 83.33 | 8.33  | 69.44 | 7.00  | 58.33 | 6.00  | 50.00 | 3.67  | 30.56 |
|                                            | LJ-109-c | 64.67 | 50.00 | 77.32 | 32.67 | 50.52 | 23.33 | 36.08 | 19.33 | 29.90 | 13.00 | 20.10 |
|                                            | LJ-110   | 20.00 | 12.67 | 63.33 | 10.00 | 50.00 | 9.33  | 46.67 | 6.33  | 31.67 | 4.33  | 21.67 |
|                                            | LJ-111   | 16.67 | 7.67  | 46.00 | 4.67  | 28.00 | 4.33  | 26.00 | 2.33  | 14.00 | 2.00  | 12.00 |
|                                            | LJ-112   | 37.33 | 24.67 | 66.07 | 19.00 | 50.89 | 11.00 | 29.46 | 9.67  | 25.89 | 8.67  | 23.21 |
| LJ-270                                     | 9.00     | 5.33  | 59.26 | 4.33  | 48.15 | 3.00  | 33.33 | 2.33  | 25.93 | 1.67  | 18.52 |       |
| Yuli                                       | LJ-1     | 8.00  | 3.33  | 41.67 | 1.33  | 16.67 | 0.33  | 4.17  | 0.00  | 0.00  | 0.00  | 0.00  |
|                                            | LJ-2     | 12.67 | 9.67  | 76.32 | 6.00  | 47.37 | 3.67  | 28.95 | 3.33  | 26.32 | 2.33  | 18.42 |
|                                            | LJ-3     | 33.33 | 19.33 | 58.00 | 9.67  | 29.00 | 5.67  | 17.00 | 4.33  | 13.00 | 3.33  | 10.00 |
|                                            | LJ-4     | 9.00  | 5.00  | 55.56 | 2.67  | 29.63 | 1.00  | 11.11 | 0.00  | 0.00  | 0.00  | 0.00  |
|                                            | LJ-5     | 29.67 | 15.67 | 52.81 | 9.00  | 30.34 | 6.33  | 21.35 | 4.33  | 14.61 | 3.00  | 10.11 |
|                                            | LJ-6     | 34.67 | 15.00 | 43.27 | 9.67  | 27.88 | 8.00  | 23.08 | 4.33  | 12.50 | 3.67  | 10.58 |
|                                            | LJ-7     | 7.33  | 5.33  | 72.73 | 2.67  | 36.36 | 2.33  | 31.82 | 1.33  | 18.18 | 1.00  | 13.64 |
|                                            | LJ-8     | 37.00 | 25.33 | 68.47 | 15.33 | 41.44 | 8.33  | 22.52 | 4.00  | 10.81 | 1.33  | 3.59  |
|                                            | LJ-180   | 39.00 | 26.00 | 66.67 | 12.33 | 31.62 | 8.33  | 21.37 | 4.67  | 11.97 | 3.67  | 9.40  |
|                                            | LJ-181   | 38.67 | 22.67 | 58.62 | 16.67 | 43.10 | 12.33 | 31.90 | 9.33  | 24.14 | 6.67  | 17.24 |
| LJ-184                                     | 8.33     | 6.00  | 72.00 | 4.33  | 52.00 | 2.67  | 32.00 | 1.33  | 16.00 | 0.33  | 4.00  |       |
| Lunnantahe                                 | LJ-9     | 5.67  | 3.00  | 52.94 | 2.33  | 41.18 | 1.33  | 23.53 | 0.67  | 11.76 | 0.67  | 11.76 |
|                                            | LJ-10    | 85.33 | 58.00 | 67.97 | 38.33 | 44.92 | 28.33 | 33.20 | 22.00 | 25.78 | 12.33 | 14.45 |
|                                            | LJ-182   | 31.00 | 20.33 | 65.59 | 13.00 | 41.94 | 9.00  | 29.03 | 6.33  | 20.43 | 3.67  | 11.83 |
|                                            | LJ-183   | 44.67 | 25.67 | 57.46 | 16.33 | 36.57 | 10.67 | 23.88 | 5.33  | 11.94 | 4.33  | 9.70  |
|                                            | LJ-185-c | 86.33 | 68.33 | 79.15 | 53.33 | 61.78 | 39.00 | 45.17 | 29.67 | 34.36 | 13.67 | 15.83 |
|                                            | LJ-186   | 46.67 | 28.67 | 61.43 | 21.00 | 45.00 | 14.00 | 30.00 | 9.67  | 20.71 | 4.00  | 8.57  |
|                                            | LJ-187   | 32.00 | 17.00 | 53.13 | 12.67 | 39.58 | 11.33 | 35.42 | 9.00  | 28.13 | 6.00  | 18.75 |
| LJ-188                                     | 42.67    | 25.33 | 59.38 | 11.00 | 25.78 | 5.00  | 11.72 | 2.00  | 4.69  | 1.33  | 3.13  |       |
| Lunnan park<br>of <i>P.<br/>euphratica</i> | LJ-231   | 80.33 | 74.00 | 92.12 | 67.00 | 83.40 | 45.00 | 56.02 | 37.00 | 46.06 | 29.33 | 36.51 |
|                                            | LJ-232   | 55.00 | 37.33 | 67.88 | 25.00 | 45.45 | 21.33 | 38.79 | 14.00 | 25.45 | 9.33  | 16.97 |
|                                            | LJ-233   | 3.67  | 3.00  | 81.82 | 1.00  | 27.27 | 0.33  | 9.09  | 0.00  | 0.00  | 0.00  | 0.00  |
|                                            | LJ-234   | 32.33 | 15.33 | 47.42 | 6.33  | 19.59 | 4.67  | 14.43 | 4.33  | 13.40 | 3.00  | 9.28  |
|                                            | LJ-235   | 11.33 | 5.67  | 50.00 | 3.00  | 26.47 | 2.00  | 17.65 | 1.00  | 8.82  | 0.33  | 2.94  |
|                                            | LJ-236   | 4.00  | 3.67  | 91.67 | 1.33  | 33.33 | 0.67  | 16.67 | 0.33  | 8.33  | 0.00  | 0.00  |
|                                            | LJ-237   | 14.67 | 11.33 | 77.27 | 8.00  | 54.55 | 5.33  | 36.36 | 2.33  | 15.91 | 0.33  | 2.27  |
|                                            | LJ-238   | 11.00 | 6.00  | 54.55 | 4.00  | 36.36 | 3.00  | 27.27 | 1.00  | 9.09  | 0.67  | 6.06  |
|                                            | LJ-239   | 37.67 | 23.33 | 61.95 | 16.67 | 44.25 | 12.33 | 32.74 | 10.33 | 27.43 | 6.00  | 15.93 |
|                                            | LJ-240   | 51.67 | 44.00 | 85.16 | 31.00 | 60.00 | 22.00 | 42.58 | 13.00 | 25.16 | 7.67  | 14.84 |
| LJ-257                                     | 9.33     | 7.00  | 75.00 | 5.00  | 53.57 | 2.00  | 21.43 | 1.67  | 17.86 | 0.33  | 3.57  |       |
| Tarim                                      | LJ-145   | 15.33 | 10.00 | 65.22 | 7.00  | 45.65 | 5.33  | 34.78 | 3.33  | 21.74 | 2.00  | 13.04 |

|          |          |       |       |       |       |       |       |       |       |       |       |       |
|----------|----------|-------|-------|-------|-------|-------|-------|-------|-------|-------|-------|-------|
| township | LJ-146   | 6.00  | 4.67  | 77.78 | 3.00  | 50.00 | 1.67  | 27.78 | 1.00  | 16.67 | 0.33  | 5.56  |
|          | LJ-147   | 11.67 | 7.67  | 65.71 | 5.33  | 45.71 | 4.00  | 34.29 | 2.00  | 17.14 | 1.67  | 14.29 |
|          | LJ-148   | 21.33 | 10.00 | 46.88 | 4.33  | 20.31 | 3.67  | 17.19 | 3.00  | 14.06 | 2.33  | 10.94 |
|          | LJ-149   | 2.67  | 2.33  | 87.50 | 1.33  | 50.00 | 1.00  | 37.50 | 0.67  | 25.00 | 0.33  | 12.50 |
|          | LJ-151-c | 5.33  | 3.33  | 62.50 | 1.67  | 31.25 | 1.33  | 25.00 | 0.67  | 12.50 | 0.33  | 6.25  |
| Shaya    | LJ-134   | 10.00 | 5.67  | 56.67 | 4.33  | 43.33 | 2.33  | 23.33 | 1.67  | 16.67 | 1.33  | 13.33 |
|          | LJ-137   | 11.33 | 6.33  | 55.88 | 2.67  | 23.53 | 1.67  | 14.71 | 1.33  | 11.76 | 0.67  | 5.88  |
|          | LJ-138   | 14.00 | 11.33 | 80.95 | 7.67  | 54.76 | 5.67  | 40.48 | 4.67  | 33.33 | 3.00  | 21.43 |
|          | LJ-139   | 1.33  | 0.33  | 25.00 | 0.00  | 0.00  | 0.00  | 0.00  | 0.00  | 0.00  | 0.00  | 0.00  |
|          | LJ-140   | 26.67 | 17.00 | 63.75 | 12.00 | 45.00 | 8.00  | 30.00 | 6.33  | 23.75 | 4.67  | 17.50 |
|          | LJ-141   | 32.00 | 25.33 | 79.17 | 17.33 | 54.17 | 12.00 | 37.50 | 8.33  | 26.04 | 3.67  | 11.46 |
|          | LJ-142   | 55.33 | 42.33 | 76.51 | 24.33 | 43.98 | 16.00 | 28.92 | 11.00 | 19.88 | 7.67  | 13.86 |
|          | LJ-261   | 59.00 | 39.67 | 67.23 | 24.33 | 41.24 | 15.00 | 25.42 | 8.33  | 14.12 | 3.67  | 6.21  |
| Awati    | LJ-123   | 79.33 | 57.33 | 72.27 | 47.33 | 59.66 | 39.33 | 49.58 | 27.67 | 34.87 | 14.00 | 17.65 |
|          | LJ-125   | 66.67 | 51.67 | 77.50 | 33.33 | 50.00 | 27.00 | 40.50 | 15.67 | 23.50 | 11.67 | 17.50 |
|          | LJ-126   | 41.00 | 31.33 | 76.42 | 15.00 | 36.59 | 6.67  | 16.26 | 2.00  | 4.88  | 0.33  | 0.81  |
|          | LJ-127   | 34.33 | 17.33 | 50.49 | 7.00  | 20.39 | 2.33  | 6.80  | 0.67  | 1.94  | 0.33  | 0.97  |
|          | LJ-128   | 94.33 | 89.33 | 94.70 | 77.33 | 81.98 | 72.33 | 76.68 | 59.33 | 62.90 | 51.33 | 54.42 |
|          | LJ-129   | 47.67 | 33.67 | 70.63 | 24.33 | 51.05 | 20.00 | 41.96 | 13.67 | 28.67 | 8.33  | 17.48 |
|          | LJ-130   | 74.33 | 70.00 | 94.17 | 49.00 | 65.92 | 35.67 | 47.98 | 33.67 | 45.29 | 24.67 | 33.18 |
|          | LJ-131   | 8.00  | 4.33  | 54.17 | 2.33  | 29.17 | 0.67  | 8.33  | 0.00  | 0.00  | 0.00  | 0.00  |
|          | LJ-132   | 19.00 | 13.33 | 70.18 | 7.67  | 40.35 | 5.33  | 28.07 | 2.67  | 14.04 | 1.33  | 7.02  |
|          | LJ-133   | 33.33 | 22.67 | 68.00 | 12.33 | 37.00 | 9.33  | 28.00 | 6.67  | 20.00 | 4.33  | 13.00 |
|          | LJ-135   | 73.67 | 55.00 | 74.66 | 42.00 | 57.01 | 33.00 | 44.80 | 23.00 | 31.22 | 9.67  | 13.12 |
| Bachu    | LJ-63    | 8.67  | 6.33  | 73.08 | 4.00  | 46.15 | 2.33  | 26.92 | 1.33  | 15.38 | 1.00  | 11.54 |
|          | LJ-64    | 13.00 | 7.67  | 58.97 | 2.33  | 17.95 | 1.33  | 10.26 | 1.00  | 7.69  | 0.67  | 5.13  |
|          | LJ-65-c  | 20.67 | 8.33  | 40.32 | 5.00  | 24.19 | 2.33  | 11.29 | 1.33  | 6.45  | 0.00  | 0.00  |
|          | LJ-66    | 26.67 | 16.33 | 61.25 | 11.00 | 41.25 | 8.33  | 31.25 | 5.67  | 21.25 | 4.33  | 16.25 |
|          | LJ-68    | 43.67 | 23.33 | 53.44 | 16.67 | 38.17 | 13.00 | 29.77 | 9.00  | 20.61 | 7.00  | 16.03 |
|          | LJ-69    | 8.67  | 3.67  | 42.31 | 1.67  | 19.23 | 1.33  | 15.38 | 0.67  | 7.69  | 0.33  | 3.85  |
|          | LJ-70    | 15.67 | 10.33 | 65.96 | 6.33  | 40.43 | 4.00  | 25.53 | 2.33  | 14.89 | 1.33  | 8.51  |
|          | LJ-71    | 26.33 | 16.00 | 60.76 | 13.33 | 50.63 | 10.00 | 37.97 | 7.33  | 27.85 | 4.67  | 17.72 |
| LJ-72    | 18.33    | 16.00 | 87.27 | 12.67 | 69.09 | 8.33  | 45.45 | 4.33  | 23.64 | 1.67  | 9.09  |       |
| Maigaiti | LJ-83    | 50.33 | 40.33 | 80.13 | 31.00 | 61.59 | 23.67 | 47.02 | 17.00 | 33.77 | 14.00 | 27.81 |
|          | LJ-84    | 38.67 | 31.67 | 81.90 | 26.00 | 67.24 | 18.33 | 47.41 | 14.67 | 37.93 | 11.67 | 30.17 |
|          | LJ-85    | 33.00 | 26.00 | 78.79 | 20.00 | 60.61 | 15.00 | 45.45 | 12.00 | 36.36 | 8.33  | 25.25 |
|          | LJ-86    | 21.00 | 14.33 | 68.25 | 11.00 | 52.38 | 6.33  | 30.16 | 3.67  | 17.46 | 2.67  | 12.70 |
|          | LJ-87    | 38.67 | 30.67 | 79.31 | 23.00 | 59.48 | 19.00 | 49.14 | 16.00 | 41.38 | 13.67 | 35.34 |
|          | LJ-88    | 69.00 | 49.67 | 71.98 | 39.33 | 57.00 | 35.00 | 50.72 | 30.33 | 43.96 | 27.33 | 39.61 |
|          | LJ-89    | 59.00 | 52.33 | 88.70 | 44.33 | 75.14 | 37.67 | 63.84 | 30.00 | 50.85 | 26.00 | 44.07 |
|          | LJ-90    | 75.67 | 66.00 | 87.22 | 55.67 | 73.57 | 50.33 | 66.52 | 39.00 | 51.54 | 33.67 | 44.49 |
|          | LJ-91    | 39.67 | 34.67 | 87.39 | 32.67 | 82.35 | 30.00 | 75.63 | 25.00 | 63.03 | 20.67 | 52.10 |
|          | LJ-92    | 52.67 | 38.00 | 72.15 | 30.67 | 58.23 | 22.00 | 41.77 | 15.67 | 29.75 | 13.00 | 24.68 |
| Jiashi   | LJ-191   | 52.67 | 43.67 | 82.91 | 32.67 | 62.03 | 21.33 | 40.51 | 16.00 | 30.38 | 9.67  | 18.35 |

|         |          |       |       |       |       |       |       |       |       |       |       |       |
|---------|----------|-------|-------|-------|-------|-------|-------|-------|-------|-------|-------|-------|
|         | LJ-192   | 28.00 | 16.33 | 58.33 | 13.33 | 47.62 | 10.33 | 36.90 | 7.33  | 26.19 | 4.67  | 16.67 |
|         | LJ-193   | 43.33 | 32.33 | 74.62 | 19.33 | 44.62 | 15.33 | 35.38 | 12.00 | 27.69 | 10.33 | 23.85 |
|         | LJ-194   | 17.33 | 13.00 | 75.00 | 9.67  | 55.77 | 7.67  | 44.23 | 6.33  | 36.54 | 4.33  | 25.00 |
|         | LJ-195   | 33.33 | 19.67 | 59.00 | 14.00 | 42.00 | 9.00  | 27.00 | 10.67 | 32.00 | 9.00  | 27.00 |
|         | LJ-196   | 29.00 | 16.00 | 55.17 | 9.33  | 32.18 | 5.33  | 18.39 | 3.67  | 12.64 | 2.33  | 8.05  |
|         | LJ-197   | 23.33 | 14.33 | 61.43 | 9.33  | 40.00 | 8.00  | 34.29 | 4.67  | 20.00 | 2.33  | 10.00 |
|         | LJ-198   | 8.00  | 6.33  | 79.17 | 5.00  | 62.50 | 2.67  | 33.33 | 1.33  | 16.67 | 0.33  | 4.17  |
|         | LJ-199   | 16.00 | 10.67 | 66.67 | 7.33  | 45.83 | 4.67  | 29.17 | 2.33  | 14.58 | 0.67  | 4.17  |
|         | LJ-200   | 55.67 | 41.33 | 74.25 | 31.33 | 56.29 | 22.33 | 40.12 | 17.33 | 31.14 | 23.33 | 41.92 |
|         | LJ-33    | 56.67 | 53.00 | 93.53 | 47.67 | 84.12 | 43.67 | 77.06 | 32.00 | 56.47 | 27.00 | 47.65 |
|         | LJ-34    | 3.67  | 2.33  | 63.64 | 0.67  | 18.18 | 0.33  | 9.09  | 0.00  | 0.00  | 0.00  | 0.00  |
|         | LJ-35    | 32.67 | 24.33 | 74.49 | 16.67 | 51.02 | 13.00 | 39.80 | 12.33 | 37.76 | 11.33 | 34.69 |
|         | LJ-36    | 17.67 | 13.33 | 75.47 | 10.67 | 60.38 | 6.33  | 35.85 | 4.33  | 24.53 | 3.67  | 20.75 |
| Pishan  | LJ-37    | 21.00 | 7.67  | 36.51 | 5.67  | 26.98 | 3.67  | 17.46 | 3.00  | 14.29 | 2.33  | 11.11 |
|         | LJ-38    | 36.33 | 26.67 | 73.39 | 20.33 | 55.96 | 16.67 | 45.87 | 8.67  | 23.85 | 6.67  | 18.35 |
|         | LJ-39    | 37.67 | 28.00 | 74.34 | 20.67 | 54.87 | 15.00 | 39.82 | 13.33 | 35.40 | 9.00  | 23.89 |
|         | LJ-40    | 41.00 | 30.00 | 73.17 | 23.67 | 57.72 | 19.33 | 47.15 | 17.67 | 43.09 | 14.33 | 34.96 |
|         | LJ-41    | 66.67 | 47.67 | 71.50 | 38.33 | 57.50 | 33.00 | 49.50 | 29.00 | 43.50 | 23.00 | 34.50 |
|         | LJ-250   | 1.33  | 0.67  | 50.00 | 0.33  | 25.00 | 0.00  | 0.00  | 0.00  | 0.00  | 0.00  | 0.00  |
|         | LJ-251-c | 2.67  | 0.67  | 25.00 | 0.33  | 12.50 | 0.00  | 0.00  | 0.00  | 0.00  | 0.00  | 0.00  |
| Moyu    | LJ-252   | 31.67 | 24.33 | 76.84 | 14.00 | 44.21 | 13.33 | 42.11 | 10.00 | 31.58 | 7.67  | 24.21 |
|         | LJ-253   | 34.00 | 20.00 | 58.82 | 15.67 | 46.08 | 9.67  | 28.43 | 8.33  | 24.51 | 4.67  | 13.73 |
|         | LJ-258   | 9.00  | 6.33  | 70.37 | 3.67  | 40.74 | 2.33  | 25.93 | 1.33  | 14.81 | 0.67  | 7.41  |
|         | LJ-265-c | 55.33 | 51.33 | 92.77 | 39.33 | 71.08 | 32.00 | 57.83 | 26.33 | 47.59 | 26.00 | 46.99 |
|         | LJ-113   | 25.00 | 19.33 | 77.33 | 15.00 | 60.00 | 10.67 | 42.67 | 8.33  | 33.33 | 5.33  | 21.33 |
|         | LJ-114   | 23.67 | 15.00 | 63.38 | 10.67 | 45.07 | 8.33  | 35.21 | 7.67  | 32.39 | 5.33  | 22.54 |
|         | LJ-115   | 18.00 | 12.67 | 70.37 | 8.33  | 46.30 | 6.67  | 37.04 | 4.33  | 24.07 | 3.33  | 18.52 |
|         | LJ-116   | 21.33 | 18.00 | 84.38 | 16.00 | 75.00 | 12.33 | 57.81 | 10.67 | 50.00 | 8.33  | 39.06 |
| Minfeng | LJ-117   | 15.00 | 10.33 | 68.89 | 7.00  | 46.67 | 5.33  | 35.56 | 4.67  | 31.11 | 2.00  | 13.33 |
|         | LJ-118   | 14.67 | 9.00  | 61.36 | 5.00  | 34.09 | 3.67  | 25.00 | 2.33  | 15.91 | 1.00  | 6.82  |
|         | LJ-119   | 4.67  | 1.67  | 35.71 | 0.67  | 14.29 | 0.33  | 7.14  | 0.00  | 0.00  | 0.00  | 0.00  |
|         | LJ-120   | 28.33 | 24.00 | 84.71 | 18.67 | 65.88 | 16.00 | 56.47 | 14.00 | 49.41 | 12.00 | 42.35 |
|         | LJ-121   | 10.00 | 8.00  | 80.00 | 4.67  | 46.67 | 3.67  | 36.67 | 2.00  | 20.00 | 1.00  | 10.00 |
|         | LJ-122-c | 14.33 | 10.67 | 74.42 | 8.00  | 55.81 | 6.67  | 46.51 | 3.67  | 25.58 | 2.00  | 13.95 |
|         | LJ-11    | 68.67 | 61.67 | 89.81 | 45.00 | 65.53 | 33.67 | 49.03 | 21.67 | 31.55 | 15.33 | 22.33 |
|         | LJ-12    | 89.33 | 83.00 | 92.91 | 76.33 | 85.45 | 65.67 | 73.51 | 52.00 | 58.21 | 38.33 | 42.91 |
|         | LJ-13    | 61.00 | 51.67 | 84.70 | 41.67 | 68.31 | 33.00 | 54.10 | 24.33 | 39.89 | 14.00 | 22.95 |
|         | LJ-14    | 23.67 | 17.33 | 73.24 | 10.00 | 42.25 | 8.33  | 35.21 | 5.33  | 22.54 | 3.67  | 15.49 |
| Ejina   | LJ-15-C  | 53.00 | 47.67 | 89.94 | 40.67 | 76.73 | 31.67 | 59.75 | 29.00 | 54.72 | 19.33 | 36.48 |
|         | LJ-16    | 51.00 | 38.33 | 75.16 | 34.67 | 67.97 | 30.00 | 58.82 | 25.00 | 49.02 | 18.67 | 36.60 |
|         | LJ-17-C  | 75.67 | 65.00 | 85.90 | 55.33 | 73.13 | 41.00 | 54.19 | 32.33 | 42.73 | 15.00 | 19.82 |
|         | LJ-18-C  | 28.67 | 19.00 | 66.28 | 13.00 | 45.35 | 8.33  | 29.07 | 6.00  | 20.93 | 3.67  | 12.79 |
|         | LJ-19    | 57.00 | 44.33 | 77.78 | 37.33 | 65.50 | 29.00 | 50.88 | 22.00 | 38.60 | 18.67 | 32.75 |

|  |          |       |       |       |       |       |       |       |       |       |       |       |
|--|----------|-------|-------|-------|-------|-------|-------|-------|-------|-------|-------|-------|
|  | LJ-20    | 29.67 | 26.67 | 89.89 | 22.00 | 74.16 | 14.33 | 48.31 | 12.67 | 42.70 | 7.33  | 24.72 |
|  | LJ-21    | 26.33 | 21.33 | 81.01 | 19.00 | 72.15 | 16.67 | 63.29 | 13.33 | 50.63 | 9.67  | 36.71 |
|  | LJ-22    | 66.00 | 52.00 | 78.79 | 39.67 | 60.10 | 29.67 | 44.95 | 22.33 | 33.84 | 17.33 | 26.26 |
|  | LJ-23    | 9.33  | 7.67  | 82.14 | 5.67  | 60.71 | 4.00  | 42.86 | 3.00  | 32.14 | 1.67  | 17.86 |
|  | LJ-24    | 17.67 | 13.33 | 75.47 | 8.67  | 49.06 | 5.67  | 32.08 | 4.33  | 24.53 | 2.00  | 11.32 |
|  | LJ-25    | 32.00 | 23.67 | 73.96 | 18.67 | 58.33 | 15.33 | 47.92 | 13.33 | 41.67 | 8.67  | 27.08 |
|  | LJ-26    | 24.33 | 19.67 | 80.82 | 15.00 | 61.64 | 10.33 | 42.47 | 7.33  | 30.14 | 5.67  | 23.29 |
|  | LJ-27    | 30.00 | 24.00 | 80.00 | 19.33 | 64.44 | 14.33 | 47.78 | 10.33 | 34.44 | 6.33  | 21.11 |
|  | LJ-28    | 11.00 | 9.67  | 87.88 | 7.67  | 69.70 | 5.67  | 51.52 | 3.33  | 30.30 | 2.33  | 21.21 |
|  | LJ-29    | 15.00 | 10.67 | 71.11 | 7.33  | 48.89 | 4.67  | 31.11 | 3.00  | 20.00 | 1.67  | 11.11 |
|  | LJ-31    | 42.00 | 27.33 | 65.08 | 18.33 | 43.65 | 12.00 | 28.57 | 7.33  | 17.46 | 5.00  | 11.90 |
|  | LJ-162   | 18.33 | 15.00 | 81.82 | 13.33 | 72.73 | 11.33 | 61.82 | 8.33  | 45.45 | 6.33  | 34.55 |
|  | LJ-163   | 37.33 | 30.67 | 82.14 | 26.00 | 69.64 | 21.33 | 57.14 | 17.67 | 47.32 | 14.67 | 39.29 |
|  | LJ-164   | 26.33 | 20.00 | 75.95 | 14.67 | 55.70 | 12.00 | 45.57 | 9.67  | 36.71 | 8.67  | 32.91 |
|  | LJ-165   | 9.67  | 7.67  | 79.31 | 5.67  | 58.62 | 4.33  | 44.83 | 3.67  | 37.93 | 2.33  | 24.14 |
|  | LJ-166   | 21.33 | 19.00 | 89.06 | 17.00 | 79.69 | 13.00 | 60.94 | 11.33 | 53.13 | 9.67  | 45.31 |
|  | LJ-167   | 26.00 | 21.33 | 82.05 | 18.33 | 70.51 | 15.00 | 57.69 | 12.67 | 48.72 | 9.67  | 37.18 |
|  | LJ-168   | 37.33 | 31.67 | 84.82 | 19.33 | 51.79 | 14.00 | 37.50 | 10.00 | 26.79 | 8.00  | 21.43 |
|  | LJ-169   | 10.67 | 9.00  | 84.38 | 7.33  | 68.75 | 6.33  | 59.38 | 3.33  | 31.25 | 1.33  | 12.50 |
|  | LJ-170   | 13.00 | 10.67 | 82.05 | 8.67  | 66.67 | 7.33  | 56.41 | 5.33  | 41.03 | 3.67  | 28.21 |
|  | LJ-171   | 8.67  | 7.00  | 80.77 | 5.00  | 57.69 | 4.33  | 50.00 | 3.33  | 38.46 | 1.00  | 11.54 |
|  | LJ-172   | 19.00 | 15.00 | 78.95 | 11.00 | 57.89 | 7.00  | 36.84 | 5.33  | 28.07 | 3.67  | 19.30 |
|  | LJ-173   | 27.00 | 20.00 | 74.07 | 16.00 | 59.26 | 12.67 | 46.91 | 9.67  | 35.80 | 6.00  | 22.22 |
|  | LJ-174   | 18.67 | 15.67 | 83.93 | 12.67 | 67.86 | 9.67  | 51.79 | 6.33  | 33.93 | 4.67  | 25.00 |
|  | LJ-175   | 45.67 | 37.67 | 82.48 | 28.67 | 62.77 | 24.00 | 52.55 | 15.33 | 33.58 | 12.33 | 27.01 |
|  | LJ-177-c | 30.00 | 24.00 | 80.00 | 21.00 | 70.00 | 14.67 | 48.89 | 10.67 | 35.56 | 6.33  | 21.11 |
|  | LJ-178   | 29.67 | 23.00 | 77.53 | 19.33 | 65.17 | 14.33 | 48.31 | 11.00 | 37.08 | 9.00  | 30.34 |
|  | LJ-179   | 2.67  | 1.67  | 62.50 | 0.33  | 12.50 | 0.00  | 0.00  | 0.00  | 0.00  | 0.00  | 0.00  |
|  | LJ-262   | 28.33 | 20.00 | 70.59 | 17.00 | 60.00 | 11.33 | 40.00 | 6.33  | 22.35 | 5.00  | 17.65 |
|  | LJ-263   | 11.00 | 8.33  | 75.76 | 6.33  | 57.58 | 5.67  | 51.52 | 4.67  | 42.42 | 2.67  | 24.24 |
|  | LJ-267   | 35.33 | 23.67 | 66.98 | 17.67 | 50.00 | 14.67 | 41.51 | 13.00 | 36.79 | 9.67  | 27.36 |
|  | LJ-124   | 61.00 | 46.00 | 75.41 | 34.67 | 56.83 | 29.00 | 47.54 | 18.67 | 30.60 | 10.00 | 16.39 |
|  | LJ-241   | 77.33 | 68.00 | 87.93 | 61.00 | 78.88 | 43.00 | 55.60 | 31.33 | 40.52 | 19.33 | 25.00 |
|  | LJ-242   | 43.67 | 26.67 | 61.07 | 20.00 | 45.80 | 15.67 | 35.88 | 10.67 | 24.43 | 8.00  | 18.32 |
|  | LJ-243   | 37.33 | 27.00 | 72.32 | 21.33 | 57.14 | 16.33 | 43.75 | 12.33 | 33.04 | 6.33  | 16.96 |
|  | LJ-244   | 50.33 | 33.67 | 66.89 | 22.33 | 44.37 | 12.67 | 25.17 | 11.00 | 21.85 | 4.33  | 8.61  |
|  | LJ-245-c | 56.00 | 46.00 | 82.14 | 40.33 | 72.02 | 37.00 | 66.07 | 29.67 | 52.98 | 20.67 | 36.90 |
|  | LJ-246   | 65.67 | 36.00 | 54.82 | 24.33 | 37.06 | 17.67 | 26.90 | 11.33 | 17.26 | 5.33  | 8.12  |
|  | LJ-247   | 66.00 | 50.33 | 76.26 | 30.00 | 45.45 | 21.33 | 32.32 | 17.33 | 26.26 | 11.00 | 16.67 |
|  | LJ-248   | 66.00 | 41.00 | 62.12 | 20.00 | 30.30 | 9.00  | 13.64 | 4.33  | 6.57  | 2.33  | 3.54  |
|  | LJ-249   | 71.67 | 56.00 | 78.14 | 41.00 | 57.21 | 30.33 | 42.33 | 22.00 | 30.70 | 17.00 | 23.72 |

**Supplemental Table S11** Correlation analysis of GRIs under five NaCl conditions.

|            | 50 mmol/L | 100 mmol/L | 150 mmol/L | 200 mmol/L | 250 mmol/L |
|------------|-----------|------------|------------|------------|------------|
| 50 mmol/L  | 1.000     |            |            |            |            |
| 100 mmol/L | 0.849**   | 1.000      |            |            |            |
| 150 mmol/L | 0.759**   | 0.935**    | 1.000      |            |            |
| 200 mmol/L | 0.690**   | 0.870**    | 0.945**    | 1.000      |            |
| 250 mmol/L | 0.583**   | 0.767**    | 0.867**    | 0.933**    | 1.000      |

**Supplemental Table S12** A total of 18 noticeable peak signals containing 38 SNPs on 18 scaffolds that significantly associated with GRIs under five NaCl concentrations.

| Significant association signals | Scaffolds     | Position      | Ref    | Alt | Variation patterns    |            |
|---------------------------------|---------------|---------------|--------|-----|-----------------------|------------|
| 1                               | scaffold1.1   | 4244996       | A      | T   | exonic, synonymous    |            |
| 2                               | scaffold3.1   | 3180383       | A      | C   | intergenic            |            |
| 3                               | scaffold12.1  | 1840150       | G      | C   | intergenic            |            |
|                                 | scaffold12.1  | 1840182       | A      | C   | intergenic            |            |
| 4                               | scaffold17.1  | 1287943       | C      | T   | intergenic            |            |
| 5                               | scaffold18.1  | 1229278       | T      | C   | intergenic            |            |
|                                 | scaffold18.1  | 1231838       | C      | A   | downstream            |            |
| 6                               | scaffold19.1  | 2736268       | C      | T   | intergenic            |            |
|                                 | scaffold22.1  | 1730625       | C      | G   | upstream              |            |
|                                 | scaffold22.1  | 1730821       | C      | G   | intronic              |            |
|                                 | scaffold22.1  | 1732501       | T      | C   | intronic              |            |
| 7                               | scaffold22.1  | 1732540       | A      | T   | intronic              |            |
|                                 | scaffold55.1  | 927605        | T      | C   | intergenic            |            |
| 8                               | scaffold68.1  | 244800        | C      | A   | downstream            |            |
| 9                               | scaffold72.1  | 876480        | T      | C   | intronic              |            |
| 10                              | scaffold158.1 | 9594          | C      | G   | downstream            |            |
| 11                              | scaffold181.1 | 226375        | C      | G   | intergenic            |            |
|                                 | scaffold181.1 | 226390        | T      | C   | intergenic            |            |
| 12                              | scaffold219.1 | 214379        | A      | T   | intergenic            |            |
|                                 | scaffold219.1 | 216540        | C      | T   | intergenic            |            |
| 13                              | scaffold277.1 | 293077        | T      | G   | intergenic            |            |
| 14                              | scaffold292.1 | 292299        | C      | A   | exonic, nonsynonymous |            |
| 15                              | scaffold309.1 | 314223        | A      | T   | exonic, nonsynonymous |            |
|                                 | scaffold413.1 | 141280        | C      | T   | downstream            |            |
|                                 | scaffold413.1 | 141440        | G      | C   | intronic              |            |
|                                 | scaffold413.1 | 141445        | T      | C   | intronic              |            |
|                                 | scaffold413.1 | 141465        | T      | C   | intronic              |            |
|                                 | scaffold413.1 | 141872        | C      | T   | intronic              |            |
|                                 | scaffold413.1 | 141909        | A      | G   | intronic              |            |
|                                 | scaffold413.1 | 141915        | T      | C   | intronic              |            |
|                                 | scaffold413.1 | 141984        | T      | C   | intronic              |            |
|                                 | scaffold413.1 | 142257        | A      | T   | intronic              |            |
| 16                              | scaffold413.1 | 142373        | C      | T   | intronic              |            |
|                                 | scaffold696.1 | 107126        | A      | T   | intronic              |            |
|                                 | scaffold696.1 | 108500        | C      | T   | intronic              |            |
|                                 | 17            | scaffold696.1 | 109466 | T   | C                     | downstream |
|                                 |               | scaffold696.1 | 110130 | C   | T                     | downstream |
|                                 |               | scaffold696.1 | 110183 | T   | G                     | downstream |
|                                 |               |               |        |     |                       |            |

**Supplemental Table S13** Genome-wide association study for GRIs of all 210 individuals (Peu & Im & Ppr).

| NaCl      | SigIn dex     | Scaffolds   | Start   | End     | Signal length | Sig_snp number | peakPOS | Ref | Alt    | Maf    | Peak value                                                | Peak effect                  | Gene ID   | Gene start | Gene end                                                                              | Position of sig_snp; ref; alt; maf; -log <sub>10</sub> (P value); snp_effective |
|-----------|---------------|-------------|---------|---------|---------------|----------------|---------|-----|--------|--------|-----------------------------------------------------------|------------------------------|-----------|------------|---------------------------------------------------------------------------------------|---------------------------------------------------------------------------------|
| 50 mmol/L | 1             | scaffold1.1 | 4224996 | 4264996 | 40001         | 1              | 4244996 | A   | T      | 0.0840 | 6.45                                                      | exon, synonymous (CCG000488) | CCG000484 | 4224710    | 4227203                                                                               | 4244996; A; T; 0.0840; 6.45; exon, synonymous (CCG000488)                       |
|           |               |             |         |         |               |                |         |     |        |        |                                                           |                              | CCG000485 | 4228133    | 4232167                                                                               |                                                                                 |
|           |               |             |         |         |               |                |         |     |        |        |                                                           |                              | CCG000486 | 4240039    | 4241385                                                                               |                                                                                 |
|           |               |             |         |         |               |                |         |     |        |        |                                                           |                              | CCG000487 | 4243065    | 4243304                                                                               |                                                                                 |
|           |               |             |         |         |               |                |         |     |        |        |                                                           |                              | CCG000488 | 4243835    | 4245669                                                                               |                                                                                 |
|           |               |             |         |         |               |                |         |     |        |        |                                                           |                              | CCG000489 | 4251899    | 4253670                                                                               |                                                                                 |
|           |               |             |         |         |               |                |         |     |        |        |                                                           |                              | CCG000490 | 4256946    | 4258556                                                                               |                                                                                 |
| 2         | scaffold3.1   | 3160383     | 3200383 | 40001   | 1             | 3180383        | A       | C   | 0.0821 | 6.19   | Intergenic (CCG017364 (dist=2903), CCG017365 (dist=6921)) | CCG017360                    | 3160294   | 3161275    | 3180383; A; C; 0.0821; 6.19; intergenic, CCG017364 (dist=2903), CCG017365 (dist=6921) |                                                                                 |
|           |               |             |         |         |               |                |         |     |        |        |                                                           | CCG017361                    | 3161805   | 3162029    |                                                                                       |                                                                                 |
|           |               |             |         |         |               |                |         |     |        |        |                                                           | CCG017362                    | 3165433   | 3166317    |                                                                                       |                                                                                 |
|           |               |             |         |         |               |                |         |     |        |        |                                                           | CCG017363                    | 3172585   | 3174489    |                                                                                       |                                                                                 |
|           |               |             |         |         |               |                |         |     |        |        |                                                           | CCG017364                    | 3175654   | 3178971    |                                                                                       |                                                                                 |
|           |               |             |         |         |               |                |         |     |        |        |                                                           | CCG017365                    | 3187304   | 3196104    |                                                                                       |                                                                                 |
|           |               |             |         |         |               |                |         |     |        |        |                                                           | CCG017366                    | 3197988   | 3201419    |                                                                                       |                                                                                 |
| 3         | scaffold18.1  | 1209278     | 1251838 | 42561   | 2             | 1231838        | C       | A   | 0.0821 | 7.55   | Downstream (CCG008616)                                    | CCG008613                    | 1212886   | 1214335    | 1229278; T; C; 0.0878; 6.97; intergenic, CCG008615 (dist=1995), CCG008616 (dist=3123) |                                                                                 |
|           |               |             |         |         |               |                |         |     |        |        |                                                           | CCG008614                    | 1215976   | 1223986    |                                                                                       |                                                                                 |
|           |               |             |         |         |               |                |         |     |        |        |                                                           | CCG008615                    | 1227092   | 1227283    |                                                                                       |                                                                                 |
|           |               |             |         |         |               |                |         |     |        |        |                                                           | CCG008616                    | 1232401   | 1232931    |                                                                                       |                                                                                 |
| 4         | scaffold19.1  | 2716268     | 2756268 | 40001   | 1             | 2736268        | C       | T   | 0.0725 | 6.14   | Intergenic (CCG009565 (dist=6223), CCG009566 (dist=5461)) | CCG009563                    | 2717414   | 2719756    | 2736268; C; T; 0.0725; 6.14; intergenic, CCG009565 (dist=6223), CCG009566 (dist=5461) |                                                                                 |
|           |               |             |         |         |               |                |         |     |        |        |                                                           | CCG009564                    | 2723631   | 2727550    |                                                                                       |                                                                                 |
|           |               |             |         |         |               |                |         |     |        |        |                                                           | CCG009565                    | 2728273   | 2730045    |                                                                                       |                                                                                 |
|           |               |             |         |         |               |                |         |     |        |        |                                                           | CCG009566                    | 2741729   | 2743755    |                                                                                       |                                                                                 |
|           |               |             |         |         |               |                |         |     |        |        |                                                           | CCG009567                    | 2752004   | 2752441    |                                                                                       |                                                                                 |
|           |               |             |         |         |               |                |         |     |        |        |                                                           | CCG009568                    | 2753687   | 2775724    |                                                                                       |                                                                                 |
| 5         | scaffold68.1  | 224800      | 264800  | 40001   | 1             | 244800         | C       | A   | 0.0763 | 6.09   | Downstream (CCG029247)                                    | CCG029245                    | 220846    | 228104     | 244800; C; A; 0.0763; 6.09; downstream, CCG029247                                     |                                                                                 |
|           |               |             |         |         |               |                |         |     |        |        |                                                           | CCG029246                    | 231184    | 232089     |                                                                                       |                                                                                 |
|           |               |             |         |         |               |                |         |     |        |        |                                                           | CCG029247                    | 245191    | 247158     |                                                                                       |                                                                                 |
|           |               |             |         |         |               |                |         |     |        |        |                                                           | CCG029248                    | 251159    | 253366     |                                                                                       |                                                                                 |
|           |               |             |         |         |               |                |         |     |        |        |                                                           | CCG029249                    | 260850    | 262495     |                                                                                       |                                                                                 |
| 6         | scaffold158.1 | 1           | 29594   | 29594   | 1             | 9594           | C       | G   | 0.1718 | 6.71   | Downstream (CCG006870)                                    | CCG006869                    | 3677      | 4999       | 9594; C; G; 0.1718; 6.71; downstream, CCG006870                                       |                                                                                 |
|           |               |             |         |         |               |                |         |     |        |        |                                                           | CCG006870                    | 9678      | 11047      |                                                                                       |                                                                                 |
|           |               |             |         |         |               |                |         |     |        |        |                                                           | CCG006871                    | 23164     | 36748      |                                                                                       |                                                                                 |
|           |               |             |         |         |               |                |         |     |        |        |                                                           | CCG008730                    | 206417    | 208284     |                                                                                       |                                                                                 |
| 7         | scaffold181.1 | 206375      | 246390  | 40016   | 2             | 226390         | T       | C   | 0.0821 | 7.02   | Intergenic (CCG008731 (dist=2210), CCG008732 (dist=5695)) | CCG008731                    | 208904    | 224588     | 226390; T; C; 0.0821; 7.02; intergenic, CCG008731 (dist=2210), CCG008732 (dist=5695)  |                                                                                 |
|           |               |             |         |         |               |                |         |     |        |        |                                                           | CCG008732                    | 232085    | 236710     |                                                                                       |                                                                                 |
|           |               |             |         |         |               |                |         |     |        |        |                                                           | CCG008733                    | 238152    | 249584     |                                                                                       |                                                                                 |
|           |               |             |         |         |               |                |         |     |        |        |                                                           | CCG008731                    | 206417    | 208284     |                                                                                       |                                                                                 |

|               |               |              |         |         |       |        |         |   |        |        |                                       |                                                                         |           |         |                                                                   |                                                                                                 |
|---------------|---------------|--------------|---------|---------|-------|--------|---------|---|--------|--------|---------------------------------------|-------------------------------------------------------------------------|-----------|---------|-------------------------------------------------------------------|-------------------------------------------------------------------------------------------------|
| 8             | scaffold292.1 | 272299       | 292955  | 20657   | 1     | 292299 | C       | A | 0.1202 | 6.80   | exon,<br>nonsynonymous<br>(CCG016767) | CCG016764                                                               | 273622    | 275705  | 292299; C; A; 0.1202; 6.80;<br>exon, nonsynonymous<br>(CCG016767) |                                                                                                 |
|               |               |              |         |         |       |        |         |   |        |        |                                       | CCG016765                                                               | 278568    | 282251  |                                                                   |                                                                                                 |
|               |               |              |         |         |       |        |         |   |        |        |                                       | CCG016766                                                               | 283049    | 283567  |                                                                   |                                                                                                 |
|               |               |              |         |         |       |        |         |   |        |        |                                       | CCG016767                                                               | 287638    | 292499  |                                                                   |                                                                                                 |
| 9             | scaffold309.1 | 294223       | 334223  | 40001   | 1     | 314223 | A       | T | 0.1011 | 6.11   | exon,<br>nonsynonymous<br>(CCG018138) | CCG018134                                                               | 295035    | 296740  | 314223; A; T; 0.1011; 6.11; exon,<br>nonsynonymous (CCG018138)    |                                                                                                 |
|               |               |              |         |         |       |        |         |   |        |        |                                       | CCG018135                                                               | 297901    | 299053  |                                                                   |                                                                                                 |
|               |               |              |         |         |       |        |         |   |        |        |                                       | CCG018136                                                               | 299673    | 301871  |                                                                   |                                                                                                 |
|               |               |              |         |         |       |        |         |   |        |        |                                       | CCG018137                                                               | 304186    | 309046  |                                                                   |                                                                                                 |
|               |               |              |         |         |       |        |         |   |        |        |                                       | CCG018138                                                               | 313133    | 314308  |                                                                   |                                                                                                 |
| 10            | scaffold413.1 | 121280       | 162373  | 41094   | 10    | 141280 | C       | T | 0.0573 | 7.28   | Downstream<br>(CCG022381)             | CCG022378                                                               | 124957    | 126488  | 141280; C; T; 0.0573; 7.28;<br>downstream, CCG022381              |                                                                                                 |
|               |               |              |         |         |       |        |         |   |        |        |                                       | CCG022379                                                               | 129863    | 132989  | 141440; G; C; 0.0573; 6.45;<br>intronic, CCG022381                |                                                                                                 |
|               |               |              |         |         |       |        |         |   |        |        |                                       | CCG022380                                                               | 135410    | 138385  | 141445; T; C; 0.0592; 6.87;<br>intronic, CCG022381                |                                                                                                 |
|               |               |              |         |         |       |        |         |   |        |        |                                       | CCG022381                                                               | 141097    | 143969  | 141465; T; C; 0.0592; 6.87;<br>intronic, CCG022381                |                                                                                                 |
|               |               |              |         |         |       |        |         |   |        |        |                                       | CCG022382                                                               | 148835    | 164719  | 141872; C; T; 0.0592; 6.87;<br>intronic, CCG022381                |                                                                                                 |
| 100<br>mmol/L | 1             | scaffold55.1 | 907605  | 947605  | 40001 | 1      | 927605  | T | C      | 0.2080 | 6.48                                  | Intergenic<br>(CCG026589<br>(dist=15845),<br>CCG026590<br>(dist=17553)) | CCG026588 | 908096  | 908706                                                            | 927605; T; C; 0.2080; 6.48;<br>intergenic, CCG026589<br>(dist=15845), CCG026590<br>(dist=17553) |
|               |               |              |         |         |       |        |         |   |        |        |                                       |                                                                         | CCG026589 | 911327  | 911855                                                            |                                                                                                 |
|               |               |              |         |         |       |        |         |   |        |        |                                       |                                                                         | CCG026590 | 944553  | 946595                                                            |                                                                                                 |
| 150<br>mmol/L | 1             | scaffold22.1 | 1710821 | 1750821 | 40001 | 1      | 1730821 | C | G      | 0.4637 | 6.07                                  | Intronic<br>(CCG012661)                                                 | CCG012660 | 1714767 | 1729984                                                           | 1730821; C; G; 0.4637; 6.07;<br>intronic, CCG012661                                             |
|               |               |              |         |         |       |        |         |   |        |        |                                       |                                                                         | CCG012661 | 1730659 | 1732874                                                           |                                                                                                 |
|               |               |              |         |         |       |        |         |   |        |        |                                       |                                                                         | CCG012662 | 1743752 | 1745928                                                           |                                                                                                 |
|               |               |              |         |         |       |        |         |   |        |        |                                       |                                                                         | CCG012663 | 1748364 | 1759060                                                           |                                                                                                 |
| 200           | 1             | scaffold22.1 | 1710821 | 1752540 | 41720 | 3      | 1730821 | C | G      | 0.4637 | 6.95                                  | Intergenic<br>(CCG026589<br>(dist=15845),<br>CCG026590<br>(dist=17553)) | CCG026588 | 908096  | 908706                                                            | 927605; T; C; 0.2080; 6.27;<br>intergenic, CCG026589<br>(dist=15845), CCG026590<br>(dist=17553) |
|               |               |              |         |         |       |        |         |   |        |        |                                       |                                                                         | CCG026589 | 911327  | 911855                                                            |                                                                                                 |
|               |               |              |         |         |       |        |         |   |        |        |                                       |                                                                         | CCG026590 | 944553  | 946595                                                            |                                                                                                 |
| 200           | 1             | scaffold22.1 | 1710821 | 1752540 | 41720 | 3      | 1730821 | C | G      | 0.4637 | 6.95                                  | Intronic                                                                | CCG012660 | 1714767 | 1729984                                                           | 1730821; 837; C; G; 0.4637;                                                                     |



| mmol/L |               |        |        |       |   |        |   |   |        |      |                                                           | (CCG012661) | CCG012661 | 1730659 | 1732874                                                                              | 6.95; intronic, CCG012661                              |
|--------|---------------|--------|--------|-------|---|--------|---|---|--------|------|-----------------------------------------------------------|-------------|-----------|---------|--------------------------------------------------------------------------------------|--------------------------------------------------------|
|        |               |        |        |       |   |        |   |   |        |      |                                                           |             | CCG012662 | 1743752 | 1745928                                                                              | 1732501; 2517; T; C; 0.4847; 6.52; intronic, CCG012661 |
|        |               |        |        |       |   |        |   |   |        |      |                                                           |             | CCG012663 | 1748364 | 1759060                                                                              | 1732540; 2556; A; T; 0.4981; 6.08; intronic, CCG012661 |
| 2      | scaffold277.1 | 273077 | 313077 | 40001 | 1 | 293077 | T | G | 0.1851 | 6.11 | Intergenic (CCG015944 (dist=5206), CCG015945 (dist=6102)) | CCG015943   | 280555    | 284790  | 293077; T; G; 0.1851; 6.11; intergenic, CCG015944 (dist=5206), CCG015945 (dist=6102) |                                                        |
|        |               |        |        |       |   |        |   |   |        |      |                                                           | CCG015944   | 285483    | 287871  |                                                                                      |                                                        |
|        |               |        |        |       |   |        |   |   |        |      |                                                           | CCG015945   | 299179    | 300204  |                                                                                      |                                                        |
|        |               |        |        |       |   |        |   |   |        |      |                                                           | CCG015946   | 306776    | 307321  |                                                                                      |                                                        |
| 3      | scaffold696.1 | 90130  | 123397 | 33268 | 2 | 110130 | C | T | 0.0992 | 6.93 | Downstream (CCG029559)                                    | CCG029558   | 96737     | 100104  | 110130; C; T; 0.0992; 6.93; downstream, CCG029559                                    |                                                        |
|        |               |        |        |       |   |        |   |   |        |      |                                                           | CCG029559   | 101478    | 109266  |                                                                                      |                                                        |
|        |               |        |        |       |   |        |   |   |        |      |                                                           | CCG029560   | 119956    | 121194  | 110183; T; G; 0.0992; 6.93; downstream, CCG029559                                    |                                                        |
| 1      | scaffold72.1  | 856480 | 896480 | 40001 | 1 | 876480 | T | C | 0.0534 | 6.30 | Intronic (CCG030115)                                      | CCG030115   | 848069    | 880613  | 876480; 0; T; C; 0.0534; 6.30; intronic, CCG030115                                   |                                                        |
|        |               |        |        |       |   |        |   |   |        |      |                                                           | CCG030116   | 889383    | 893415  |                                                                                      |                                                        |
| 2      | scaffold277.1 | 273077 | 313077 | 40001 | 1 | 293077 | T | G | 0.1851 | 6.94 | Intergenic (CCG015944 (dist=5206), CCG015945 (dist=6102)) | CCG015943   | 280555    | 284790  | 293077; T; G; 0.1851; 6.94; intergenic, CCG015944 (dist=5206), CCG015945 (dist=6102) |                                                        |
|        |               |        |        |       |   |        |   |   |        |      |                                                           | CCG015944   | 285483    | 287871  |                                                                                      |                                                        |
|        |               |        |        |       |   |        |   |   |        |      |                                                           | CCG015945   | 299179    | 300204  |                                                                                      |                                                        |
|        |               |        |        |       |   |        |   |   |        |      |                                                           | CCG015946   | 306776    | 307321  |                                                                                      |                                                        |
|        |               |        |        |       |   |        |   |   |        |      |                                                           | CCG029558   | 96737     | 100104  | 107126; A; T; 0.0744; 6.91; intronic, CCG029559                                      |                                                        |
| 3      | scaffold696.1 | 87126  | 123397 | 36272 | 3 | 110130 | C | T | 0.0992 | 8.38 | Downstream (CCG029559)                                    | CCG029559   | 101478    | 109266  | 110130; C; T; 0.0992; 8.38; downstream, CCG029559                                    |                                                        |
|        |               |        |        |       |   |        |   |   |        |      |                                                           | CCG029560   | 119956    | 121194  | 110183; T; G; 0.0992; 8.38; downstream, CCG029559                                    |                                                        |

250  
mmol/L

**Supplemental Table S14** Genome-wide association study for GRIs of *P. euphratica* and intermediate individuals (Peu & Im).

| NaCl       | SigIn dex     | Scaffolds    | Start   | End     | Signal length | Sig_snp number | peakPOS | Ref | Alt    | Maf    | Peak value                                                | Peak effect                                    | Gene ID   | Gene start | Gene end                                                                               | Position of sig_snp; ref; alt; maf; -log <sub>10</sub> (P value); snp_effective        |
|------------|---------------|--------------|---------|---------|---------------|----------------|---------|-----|--------|--------|-----------------------------------------------------------|------------------------------------------------|-----------|------------|----------------------------------------------------------------------------------------|----------------------------------------------------------------------------------------|
| 50 mmol/L  | 1             | scaffold1.1  | 4224996 | 4264996 | 40001         | 1              | 4244996 | A   | T      | 0.0840 | 6.24                                                      | Exon, synonymous (CCG000488)                   | CCG000484 | 4224710    | 4227203                                                                                | 4244996; A; T; 0.0840; 6.24; exon, synonymous (CCG000488)                              |
|            |               |              |         |         |               |                |         |     |        |        |                                                           |                                                | CCG000485 | 4228133    | 4232167                                                                                |                                                                                        |
|            |               |              |         |         |               |                |         |     |        |        |                                                           |                                                | CCG000486 | 4240039    | 4241385                                                                                |                                                                                        |
|            |               |              |         |         |               |                |         |     |        |        |                                                           |                                                | CCG000487 | 4243065    | 4243304                                                                                |                                                                                        |
|            |               |              |         |         |               |                |         |     |        |        |                                                           |                                                | CCG000488 | 4243835    | 4245669                                                                                |                                                                                        |
|            |               |              |         |         |               |                |         |     |        |        |                                                           |                                                | CCG000489 | 4251899    | 4253670                                                                                |                                                                                        |
|            |               |              |         |         |               |                |         |     |        |        |                                                           |                                                | CCG000490 | 4256946    | 4258556                                                                                |                                                                                        |
| 2          | scaffold3.1   | 3160383      | 3200383 | 40001   | 1             | 3180383        | A       | C   | 0.0821 | 6.04   | Intergenic (CCG017364 (dist=2903), CCG017365 (dist=6921)) | CCG000491                                      | 4260158   | 4261631    | 3180383; A; C; 0.0821; 6.04; intergenic, CCG017364 (dist=2903), CCG017365 (dist=6921)  |                                                                                        |
|            |               |              |         |         |               |                |         |     |        |        |                                                           | CCG000492                                      | 4263144   | 4264139    |                                                                                        |                                                                                        |
|            |               |              |         |         |               |                |         |     |        |        |                                                           | CCG017360                                      | 3160294   | 3161275    |                                                                                        |                                                                                        |
|            |               |              |         |         |               |                |         |     |        |        |                                                           | CCG017361                                      | 3161805   | 3162029    |                                                                                        |                                                                                        |
|            |               |              |         |         |               |                |         |     |        |        |                                                           | CCG017362                                      | 3165433   | 3166317    |                                                                                        |                                                                                        |
|            |               |              |         |         |               |                |         |     |        |        |                                                           | CCG017363                                      | 3172585   | 3174489    |                                                                                        |                                                                                        |
|            |               |              |         |         |               |                |         |     |        |        |                                                           | CCG017364                                      | 3175654   | 3178971    |                                                                                        |                                                                                        |
| 3          | scaffold18.1  | 1209278      | 1251838 | 42561   | 2             | 1231838        | C       | A   | 0.0821 | 7.38   | Downstream (CCG008616)                                    | CCG008613                                      | 1212886   | 1214335    | 1229278; T; C; 0.0878; 6.70; intergenic, CCG008615 (dist=1995), CCG008616 (dist=3123)  |                                                                                        |
|            |               |              |         |         |               |                |         |     |        |        |                                                           | CCG008614                                      | 1215976   | 1223986    |                                                                                        |                                                                                        |
|            |               |              |         |         |               |                |         |     |        |        |                                                           | CCG008615                                      | 1227092   | 1227283    |                                                                                        |                                                                                        |
|            |               |              |         |         |               |                |         |     |        |        |                                                           | CCG008616                                      | 1232401   | 1232931    |                                                                                        |                                                                                        |
| 4          | scaffold19.1  | 2716268      | 2756268 | 40001   | 1             | 2736268        | C       | T   | 0.0725 | 6.05   | Intergenic (CCG009565 (dist=6223), CCG009566 (dist=5461)) | CCG009563                                      | 2717414   | 2719756    | 2736268; C; T; 0.0725; 6.045; intergenic, CCG009565 (dist=6223), CCG009566 (dist=5461) |                                                                                        |
|            |               |              |         |         |               |                |         |     |        |        |                                                           | CCG009564                                      | 2723631   | 2727550    |                                                                                        |                                                                                        |
|            |               |              |         |         |               |                |         |     |        |        |                                                           | CCG009565                                      | 2728273   | 2730045    |                                                                                        |                                                                                        |
|            |               |              |         |         |               |                |         |     |        |        |                                                           | CCG009566                                      | 2741729   | 2743755    |                                                                                        |                                                                                        |
|            |               |              |         |         |               |                |         |     |        |        |                                                           | CCG009567                                      | 2752004   | 2752441    |                                                                                        |                                                                                        |
| 5          | scaffold158.1 | 1            | 29594   | 29594   | 1             | 9594           | C       | G   | 0.1718 | 6.97   | Downstream (CCG006870)                                    | CCG009568                                      | 2753687   | 2775724    | 9594; C; G; 0.1718; 6.97; downstream, CCG006870                                        |                                                                                        |
|            |               |              |         |         |               |                |         |     |        |        |                                                           | CCG006869                                      | 3677      | 4999       |                                                                                        |                                                                                        |
|            |               |              |         |         |               |                |         |     |        |        |                                                           | CCG006870                                      | 9678      | 11047      |                                                                                        |                                                                                        |
|            |               |              |         |         |               |                |         |     |        |        |                                                           | CCG006871                                      | 23164     | 36748      |                                                                                        |                                                                                        |
| 6          | scaffold181.1 | 206375       | 246390  | 40016   | 2             | 226390         | T       | C   | 0.0821 | 6.89   | Intergenic (CCG008731 (dist=2210), CCG008732 (dist=5695)) | CCG008730                                      | 206417    | 208284     | 226375; C; G; 0.0763; 6.28; intergenic, CCG008731 (dist=2195), CCG008732 (dist=5710)   |                                                                                        |
|            |               |              |         |         |               |                |         |     |        |        |                                                           | CCG008731                                      | 208904    | 224588     |                                                                                        |                                                                                        |
|            |               |              |         |         |               |                |         |     |        |        |                                                           | CCG008732                                      | 232085    | 236710     |                                                                                        |                                                                                        |
|            |               |              |         |         |               |                |         |     |        |        |                                                           | CCG008733                                      | 238152    | 249584     |                                                                                        |                                                                                        |
| 7          | scaffold292.1 | 272299       | 292955  | 20657   | 1             | 292299         | C       | A   | 0.1202 | 6.69   | Exon, nonsynonymous (CCG016767)                           | CCG016764                                      | 273622    | 275705     | 292299; C; A; 0.1202; 6.69; exon, nonsynonymous (CCG016767)                            |                                                                                        |
|            |               |              |         |         |               |                |         |     |        |        |                                                           | CCG016765                                      | 278568    | 282251     |                                                                                        |                                                                                        |
|            |               |              |         |         |               |                |         |     |        |        |                                                           | CCG016766                                      | 283049    | 283567     |                                                                                        |                                                                                        |
|            |               |              |         |         |               |                |         |     |        |        |                                                           | CCG016767                                      | 287638    | 292499     |                                                                                        |                                                                                        |
| 100 mmol/L | 1             | scaffold55.1 | 907605  | 947605  | 40001         | 1              | 927605  | T   | C      | 0.2080 | 6.51                                                      | Intergenic (CCG026589 (dist=15845), CCG026590) | CCG026588 | 908096     | 908706                                                                                 | 927605; T; C; 0.2080; 6.51; intergenic, CCG026589 (dist=15845), CCG026590 (dist=17553) |
|            |               |              |         |         |               |                |         |     |        |        |                                                           |                                                | CCG026589 | 911327     | 911855                                                                                 |                                                                                        |
|            |               |              |         |         |               |                |         |     |        |        |                                                           |                                                | CCG026590 | 944553     | 946595                                                                                 |                                                                                        |

|               |               |               |         |         |       |        |         |   |        |        |                                                                        |                                                                      | (dist=17553) |         |                                                                                                 |                                                                                               |
|---------------|---------------|---------------|---------|---------|-------|--------|---------|---|--------|--------|------------------------------------------------------------------------|----------------------------------------------------------------------|--------------|---------|-------------------------------------------------------------------------------------------------|-----------------------------------------------------------------------------------------------|
| 150<br>mmol/L | 1             | scaffold22.1  | 1710821 | 1752501 | 41681 | 2      | 1732501 | T | C      | 0.4847 | 6.55                                                                   | Intronic<br>(CCG012661)                                              | CCG012660    | 1714767 | 1729984                                                                                         | 1730821; C; G; 0.4637; 6.20;<br>intronic, CCG012661                                           |
|               |               |               |         |         |       |        |         |   |        |        |                                                                        |                                                                      | CCG012661    | 1730659 | 1732874                                                                                         |                                                                                               |
|               |               |               |         |         |       |        |         |   |        |        |                                                                        |                                                                      | CCG012662    | 1743752 | 1745928                                                                                         |                                                                                               |
|               |               |               |         |         |       |        |         |   |        |        |                                                                        |                                                                      | CCG012663    | 1748364 | 1759060                                                                                         |                                                                                               |
| 2             | scaffold55.1  | 907605        | 947605  | 40001   | 1     | 927605 | T       | C | 0.2080 | 6.39   | Intergenic<br>(CCG026589<br>dist=15845),<br>CCG026590<br>(dist=17553)) | CCG026588                                                            | 908096       | 908706  | 927605; T; C; 0.2080; 6.39;<br>intergenic, CCG026589<br>(dist=15845), CCG026590<br>(dist=17553) |                                                                                               |
|               |               |               |         |         |       |        |         |   |        |        |                                                                        | CCG026589                                                            | 911327       | 911855  |                                                                                                 |                                                                                               |
|               |               |               |         |         |       |        |         |   |        |        |                                                                        | CCG026590                                                            | 944553       | 946595  |                                                                                                 |                                                                                               |
|               |               |               |         |         |       |        |         |   |        |        |                                                                        |                                                                      |              |         |                                                                                                 |                                                                                               |
| 200<br>mmol/L | 1             | scaffold22.1  | 1710625 | 1752540 | 41916 | 4      | 1732501 | T | C      | 0.4847 | 7.39                                                                   | Intronic<br>(CCG012661)                                              | CCG012660    | 1714767 | 1729984                                                                                         | 1730625; C; G; 0.4294; 6.27;<br>upstream, CCG012660,<br>CCG012661                             |
|               |               |               |         |         |       |        |         |   |        |        |                                                                        |                                                                      | CCG012661    | 1730659 | 1732874                                                                                         |                                                                                               |
|               |               |               |         |         |       |        |         |   |        |        |                                                                        |                                                                      | CCG012662    | 1743752 | 1745928                                                                                         |                                                                                               |
|               |               |               |         |         |       |        |         |   |        |        |                                                                        |                                                                      | CCG012663    | 1748364 | 1759060                                                                                         |                                                                                               |
| 2             | scaffold277.1 | 273077        | 313077  | 40001   | 1     | 293077 | T       | G | 0.1851 | 6.10   | Intergenic<br>(CCG015944<br>dist=5206),<br>CCG015945<br>(dist=6102))   | CCG015943                                                            | 280555       | 284790  | 293077; T; G; 0.1851; 6.099;<br>intergenic, CCG015944<br>(dist=5206), CCG015945<br>(dist=6102)  |                                                                                               |
|               |               |               |         |         |       |        |         |   |        |        |                                                                        | CCG015944                                                            | 285483       | 287871  |                                                                                                 |                                                                                               |
|               |               |               |         |         |       |        |         |   |        |        |                                                                        | CCG015945                                                            | 299179       | 300204  |                                                                                                 |                                                                                               |
|               |               |               |         |         |       |        |         |   |        |        |                                                                        | CCG015946                                                            | 306776       | 307321  |                                                                                                 |                                                                                               |
| 3             | scaffold696.1 | 90130         | 123397  | 33268   | 2     | 110130 | C       | T | 0.0992 | 6.92   | Downstream<br>(CCG029559)                                              | CCG029558                                                            | 96737        | 100104  | 110130; C; T; 0.0992; 6.92;<br>downstream, CCG029559                                            |                                                                                               |
|               |               |               |         |         |       |        |         |   |        |        |                                                                        | CCG029559                                                            | 101478       | 109266  |                                                                                                 |                                                                                               |
|               |               |               |         |         |       |        |         |   |        |        |                                                                        | CCG029560                                                            | 119956       | 121194  |                                                                                                 |                                                                                               |
|               |               |               |         |         |       |        |         |   |        |        |                                                                        |                                                                      |              |         |                                                                                                 |                                                                                               |
| 250<br>mmol/L | 1             | scaffold277.1 | 273077  | 313077  | 40001 | 1      | 293077  | T | G      | 0.1851 | 6.62                                                                   | Intergenic<br>(CCG015944<br>dist=5206),<br>CCG015945<br>(dist=6102)) | CCG015943    | 280555  | 284790                                                                                          | 293077; T; G; 0.1851; 6.62;<br>intergenic, CCG015944<br>(dist=5206), CCG015945<br>(dist=6102) |
|               |               |               |         |         |       |        |         |   |        |        |                                                                        |                                                                      | CCG015944    | 285483  | 287871                                                                                          |                                                                                               |
|               |               |               |         |         |       |        |         |   |        |        |                                                                        |                                                                      | CCG015945    | 299179  | 300204                                                                                          |                                                                                               |
|               |               |               |         |         |       |        |         |   |        |        |                                                                        |                                                                      | CCG015946    | 306776  | 307321                                                                                          |                                                                                               |
| 2             | scaffold696.1 | 87126         | 123397  | 36272   | 3     | 110130 | C       | T | 0.0992 | 8.33   | Downstream<br>(CCG029559)                                              | CCG029558                                                            | 96737        | 100104  | 107126; A; T; 0.0744; 6.81;<br>intronic, CCG029559                                              |                                                                                               |
|               |               |               |         |         |       |        |         |   |        |        |                                                                        | CCG029559                                                            | 101478       | 109266  |                                                                                                 |                                                                                               |
|               |               |               |         |         |       |        |         |   |        |        |                                                                        | CCG029560                                                            | 119956       | 121194  |                                                                                                 |                                                                                               |
|               |               |               |         |         |       |        |         |   |        |        |                                                                        |                                                                      |              |         |                                                                                                 |                                                                                               |

**Supplemental Table S15** Genome-wide association study for GRIs of *P. euphratica* individuals (Peu).

| NaCl       | SigIn dex     | Scaffolds     | Start   | End     | Signal length | Sig_snp number | peakPOS | Ref | Alt    | Maf    | Peak value                      | Peak effect                                                 | Gene ID   | Gene start | Gene end                                                    | Position of sig_snp; ref; alt; maf; -log <sub>10</sub> (P value); snp_effective        |
|------------|---------------|---------------|---------|---------|---------------|----------------|---------|-----|--------|--------|---------------------------------|-------------------------------------------------------------|-----------|------------|-------------------------------------------------------------|----------------------------------------------------------------------------------------|
| 50 mmol/L  | 1             | scaffold17.1  | 1267943 | 1307943 | 40001         | 1              | 1287943 | C   | T      | 0.2118 | 6.34                            | Intergenic (CCG007866 (dist=6281), CCG007867 (dist=14409))  | CCG007865 | 1273808    | 1276056                                                     | 1287943; C; T; 0.2118; 6.34; intergenic, CCG007866 (dist=6281), CCG007867 (dist=14409) |
|            |               |               |         |         |               |                |         |     |        |        |                                 |                                                             | CCG007866 | 1277322    | 1281716                                                     |                                                                                        |
|            |               |               |         |         |               |                |         |     |        |        |                                 |                                                             | CCG007867 | 1302352    | 1303995                                                     |                                                                                        |
|            | 2             | scaffold18.1  | 1211838 | 1251838 | 40001         | 1              | 1231838 | C   | A      | 0.0821 | 6.73                            | Downstream (CCG008616)                                      | CCG008613 | 1212886    | 1214335                                                     | 1231838; C; A; 0.0821; 6.73; downstream, CCG008616                                     |
|            |               |               |         |         |               |                |         |     |        |        |                                 |                                                             | CCG008614 | 1215976    | 1223986                                                     |                                                                                        |
|            |               |               |         |         |               |                |         |     |        |        |                                 |                                                             | CCG008615 | 1227092    | 1227283                                                     |                                                                                        |
|            | 3             | scaffold158.1 | 1       | 29594   | 29594         | 1              | 9594    | C   | G      | 0.1718 | 6.11                            | Downstream (CCG006870)                                      | CCG006869 | 3677       | 4999                                                        | 9594; C; G; 0.1718; 6.11; downstream, CCG006870                                        |
|            |               |               |         |         |               |                |         |     |        |        |                                 |                                                             | CCG006870 | 9678       | 11047                                                       |                                                                                        |
|            |               |               |         |         |               |                |         |     |        |        |                                 |                                                             | CCG006871 | 23164      | 36748                                                       |                                                                                        |
|            | 4             | scaffold181.1 | 206390  | 246390  | 40001         | 1              | 226390  | T   | C      | 0.0821 | 6.54                            | Intergenic (CCG008731 (dist=2210), CCG008732 (dist=5695))   | CCG008730 | 206417     | 208284                                                      | 226390; T; C; 0.0821; 6.54; intergenic, CCG008731 (dist=2210), CCG008732 (dist=5695)   |
|            |               |               |         |         |               |                |         |     |        |        |                                 |                                                             | CCG008731 | 208904     | 224588                                                      |                                                                                        |
|            |               |               |         |         |               |                |         |     |        |        |                                 |                                                             | CCG008732 | 232085     | 236710                                                      |                                                                                        |
| 5          | scaffold292.1 | 272299        | 292955  | 20657   | 1             | 292299         | C       | A   | 0.1202 | 6.30   | Exon, nonsynonymous (CCG016767) | CCG016764                                                   | 273622    | 275705     | 292299; C; A; 0.1202; 6.30; exon, nonsynonymous (CCG016767) |                                                                                        |
|            |               |               |         |         |               |                |         |     |        |        |                                 | CCG016765                                                   | 278568    | 282251     |                                                             |                                                                                        |
|            |               |               |         |         |               |                |         |     |        |        |                                 | CCG016766                                                   | 283049    | 283567     |                                                             |                                                                                        |
| 100 mmol/L | 1             | scaffold55.1  | 907605  | 947605  | 40001         | 1              | 927605  | T   | C      | 0.2080 | 7.37                            | Intergenic (CCG026589 (dist=15845), CCG026590 (dist=17553)) | CCG026588 | 908096     | 908706                                                      | 927605; T; C; 0.2080; 7.37; intergenic, CCG026589 (dist=15845), CCG026590 (dist=17553) |
|            |               |               |         |         |               |                |         |     |        |        |                                 |                                                             | CCG026589 | 911327     | 911855                                                      |                                                                                        |
|            |               |               |         |         |               |                |         |     |        |        |                                 |                                                             | CCG026590 | 944553     | 946595                                                      |                                                                                        |
|            | 1             | scaffold22.1  | 1710625 | 1752501 | 41877         | 3              | 1732501 | T   | C      | 0.4847 | 7.14                            | Intronic (CCG012661)                                        | CCG012660 | 1714767    | 1729984                                                     | 1730625; C; G; 0.4294; 6.49; upstream, CCG012660, CCG012661                            |
|            |               |               |         |         |               |                |         |     |        |        |                                 |                                                             | CCG012661 | 1730659    | 1732874                                                     |                                                                                        |
|            |               |               |         |         |               |                |         |     |        |        |                                 |                                                             | CCG012662 | 1743752    | 1745928                                                     |                                                                                        |
|            | 2             | scaffold55.1  | 907605  | 947605  | 40001         | 1              | 927605  | T   | C      | 0.2080 | 6.82                            | Intergenic (CCG026589 (dist=15845), CCG026590 (dist=17553)) | CCG012663 | 1748364    | 1759060                                                     | 1732501; T; C; 0.4847; 7.14; intronic, CCG012661                                       |
|            |               |               |         |         |               |                |         |     |        |        |                                 |                                                             | CCG026588 | 908096     | 908706                                                      |                                                                                        |
|            |               |               |         |         |               |                |         |     |        |        |                                 |                                                             | CCG026589 | 911327     | 911855                                                      |                                                                                        |
|            | 3             | scaffold696.1 | 87126   | 123397  | 36272         | 3              | 110130  | C   | T      | 0.0992 | 6.23                            | Downstream (CCG029559)                                      | CCG026590 | 944553     | 946595                                                      | 927605; T; C; 0.2080; 6.82; intergenic, CCG026589 (dist=15845), CCG026590 (dist=17553) |
|            |               |               |         |         |               |                |         |     |        |        |                                 |                                                             | CCG029558 | 96737      | 100104                                                      |                                                                                        |
|            |               |               |         |         |               |                |         |     |        |        |                                 |                                                             | CCG029559 | 101478     | 109266                                                      |                                                                                        |
| 1          | scaffold22.1  | 1710625       | 1752540 | 41916   | 4             | 1732501        | T       | C   | 0.4847 | 8.12   | Intronic (CCG012661)            | CCG029560                                                   | 119956    | 121194     | 107126; A; T; 0.0744; 6.04; intronic, CCG029559             |                                                                                        |
|            |               |               |         |         |               |                |         |     |        |        |                                 | CCG029559                                                   | 101478    | 109266     |                                                             |                                                                                        |
|            |               |               |         |         |               |                |         |     |        |        |                                 | CCG029560                                                   | 119956    | 121194     |                                                             |                                                                                        |
| 200 mmol   | 1             | scaffold22.1  | 1710625 | 1752540 | 41916         | 4              | 1732501 | T   | C      | 0.4847 | 8.12                            | Intronic (CCG012661)                                        | CCG012660 | 1714767    | 1729984                                                     | 110130; C; T; 0.0992; 6.23; downstream, CCG029559                                      |
|            |               |               |         |         |               |                |         |     |        |        |                                 |                                                             | CCG012661 | 1730659    | 1732874                                                     |                                                                                        |
|            |               |               |         |         |               |                |         |     |        |        |                                 |                                                             | CCG012660 | 1714767    | 1729984                                                     | 1730625; C; G; 0.4294; 7.41; upstream, CCG012660,                                      |
|            |               |               |         |         |               |                |         |     |        |        |                                 |                                                             | CCG012661 | 1730659    | 1732874                                                     |                                                                                        |

L

|   |               |         |         |       |   |         |   |   |        |      |                                                             |           |         |         |           |                                                                                         |         |
|---|---------------|---------|---------|-------|---|---------|---|---|--------|------|-------------------------------------------------------------|-----------|---------|---------|-----------|-----------------------------------------------------------------------------------------|---------|
|   |               |         |         |       |   |         |   |   |        |      |                                                             | CCG012662 | 1743752 | 1745928 | CCG012661 | 1730821; C; G; 0.4637; 7.99; intronic, CCG012661                                        |         |
|   |               |         |         |       |   |         |   |   |        |      |                                                             | CCG012663 | 1748364 | 1759060 | CCG012661 | 1732501; T; C; 0.4847; 8.12; intronic, CCG012661                                        |         |
|   |               |         |         |       |   |         |   |   |        |      |                                                             | CCG029558 | 96737   | 100104  | CCG012661 | 1732540; A; T; 0.4981; 6.63; intronic, CCG012661                                        |         |
| 2 | scaffold696.1 | 87126   | 123397  | 36272 | 3 | 110130  | C | T | 0.0992 | 7.32 | Downstream (CCG029559)                                      | CCG029559 | 101478  | 109266  | CCG029559 | 107126; A; T; 0.0744; 6.47; intronic, CCG029559                                         |         |
|   |               |         |         |       |   |         |   |   |        |      |                                                             | CCG029560 | 119956  | 121194  | CCG029559 | 110183; T; G; 0.0992; 7.32; downstream, CCG029559                                       |         |
| 1 | scaffold12.1  | 1820150 | 1860182 | 40033 | 2 | 1840150 | G | C | 0.0687 | 6.48 | Intergenic (CCG003400 (dist=13520), CCG003401 (dist=10628)) | CCG003399 | 1818181 | 1822256 | CCG003400 | 1840150; G; C; 0.0687; 6.48; intergenic, CCG003400 (dist=13520), CCG003401 (dist=10628) |         |
|   |               |         |         |       |   |         |   |   |        |      |                                                             | CCG003400 | 1822406 | 1826801 | CCG003401 | 1840182; A; C; 0.0668; 6.19; intergenic, CCG003400 (dist=13552), CCG003401 (dist=10596) |         |
|   |               |         |         |       |   |         |   |   |        |      |                                                             | CCG003401 | 1850082 | 1852475 | CCG003402 | 1853972                                                                                 | 1856016 |
|   |               |         |         |       |   |         |   |   |        |      |                                                             | CCG003403 | 1859509 | 1865568 | CCG003403 | 1859509                                                                                 | 1865568 |
| 2 | scaffold22.1  | 1710625 | 1752501 | 41877 | 3 | 1730821 | C | G | 0.4637 | 6.85 | Intronic (CCG012661)                                        | CCG012660 | 1714767 | 1729984 | CCG012661 | 1730625; C; G; 0.4294; 6.79; upstream, CCG012660, CCG012661                             |         |
|   |               |         |         |       |   |         |   |   |        |      |                                                             | CCG012661 | 1730659 | 1732874 | CCG012662 | 1730821; C; G; 0.4637; 6.85; intronic, CCG012661                                        |         |
|   |               |         |         |       |   |         |   |   |        |      |                                                             | CCG012662 | 1743752 | 1745928 | CCG012663 | 1732501; T; C; 0.4847; 6.46; intronic, CCG012661                                        |         |
|   |               |         |         |       |   |         |   |   |        |      |                                                             | CCG012663 | 1748364 | 1759060 | CCG012411 | 214379; A; T; 0.1450; 6.10; intergenic, CCG012412 (dist=1822), CCG012413 (dist=6100)    |         |
| 3 | scaffold219.1 | 194379  | 236540  | 42162 | 2 | 216540  | C | T | 0.1698 | 6.52 | Intergenic (CCG012412 (dist=3983), CCG012413 (dist=3939))   | CCG012411 | 201602  | 203795  | CCG012412 | 212063                                                                                  | 212557  |
|   |               |         |         |       |   |         |   |   |        |      |                                                             | CCG012412 | 212063  | 212557  | CCG012413 | 220479                                                                                  | 222515  |
|   |               |         |         |       |   |         |   |   |        |      |                                                             | CCG012413 | 220479  | 222515  | CCG012414 | 227644                                                                                  | 229334  |
|   |               |         |         |       |   |         |   |   |        |      |                                                             | CCG012414 | 227644  | 229334  | CCG012415 | 229939                                                                                  | 230680  |
|   |               |         |         |       |   |         |   |   |        |      |                                                             | CCG012415 | 229939  | 230680  | CCG029558 | 96737                                                                                   | 100104  |
| 4 | scaffold696.1 | 87126   | 123397  | 36272 | 5 | 110130  | C | T | 0.0992 | 8.81 | Downstream (CCG029559)                                      | CCG029558 | 96737   | 100104  | CCG029559 | 107126; A; T; 0.0744; 7.39; intronic, CCG029559                                         |         |
|   |               |         |         |       |   |         |   |   |        |      |                                                             | CCG029559 | 101478  | 109266  | CCG029559 | 108500; C; T; 0.0744; 6.36; intronic, CCG029559                                         |         |
|   |               |         |         |       |   |         |   |   |        |      |                                                             | CCG029559 | 101478  | 109266  | CCG029559 | 109466; T; C; 0.0687; 6.31; downstream, CCG029559                                       |         |

250  
mmol  
/L

|           |        |        |                                                      |
|-----------|--------|--------|------------------------------------------------------|
| CCG029560 | 119956 | 121194 | 110130; C; T; 0.0992; 8.81;<br>downstream, CCG029559 |
|           |        |        | 110183; T; G; 0.0992; 8.81;<br>downstream, CCG029559 |

---

**Supplemental Table S16** Comparison of GWAS results with three sample groups under five NaCl conditions.

| Scaffolds    | Gene ID   | Annotation                                                                                            | <i>P. trichocarpa</i><br>(Ptr) Gene ID | Ptr_Annotation                                                                                                                                                    | Peu & Im & Ppr<br>(A) | Peu & Im (B) | Peu (C) |
|--------------|-----------|-------------------------------------------------------------------------------------------------------|----------------------------------------|-------------------------------------------------------------------------------------------------------------------------------------------------------------------|-----------------------|--------------|---------|
|              | CCG000484 | no                                                                                                    | no                                     | no                                                                                                                                                                | A1_p50                | B1_p50       | -       |
|              | CCG000485 | Protein phosphatase 2C containing protein;<br>K01102 pyruvate dehydrogenase<br>phosphatase            | Potri.008G104300                       | Protein phosphatase 2C family protein; similar<br>to Ser/Thr protein phosphatase 2C (PP2C6)<br>( <i>Arabidopsis thaliana</i> )                                    | A1_p50                | B1_p50       | -       |
|              | CCG000486 | Hypothetical protein LOC100304369;<br>K10581 ubiquitin-conjugating enzyme E2                          | Potri.008G104400                       | Ubiquitin-protein ligase                                                                                                                                          | A1_p50                | B1_p50       | -       |
|              | CCG000487 | no                                                                                                    | no                                     | no                                                                                                                                                                | A1_p50                | B1_p50       | -       |
| scaffold1.1  | CCG000488 | Enoyl-CoA hydratase                                                                                   | Potri.008G104500                       | Enoyl-CoA hydratase/isomerase family protein;<br>similar to 3-hydroxybutyryl-CoA dehydratase<br>(Crotonase) from <i>Clostridium acetobutylicum</i>                | A1_p50                | B1_p50       | -       |
|              | CCG000489 | GDSL esterase/lipase At4g16230-like                                                                   | Potri.008G104600                       | PTHR22835//PTHR22835:SF163 - Zinc Finger<br>FYVE Domain Containing Protein                                                                                        | A1_p50                | B1_p50       | -       |
|              | CCG000490 | GDSL esterase/lipase At4g16230-like                                                                   | Potri.008G104700                       | PTHR22835//PTHR22835:SF163 - Zinc Finger<br>FYVE Domain Containing Protein                                                                                        | A1_p50                | B1_p50       | -       |
|              | CCG000491 | Pectinesterase family protein; K01051<br>pectinesterase                                               | Potri.008G104800                       | Pectinesterase / Pectin methylesterase                                                                                                                            | A1_p50                | B1_p50       | -       |
|              | CCG000492 | no                                                                                                    | no                                     | no                                                                                                                                                                | A1_p50                | B1_p50       | -       |
|              | CCG017360 | no                                                                                                    | no                                     | no                                                                                                                                                                | A1_p50                | B1_p50       | -       |
|              | CCG017361 | no                                                                                                    | no                                     | no                                                                                                                                                                | A1_p50                | B1_p50       | -       |
|              | CCG017362 | no                                                                                                    | Potri.009G112500                       | Probable lipid transfer (LTP_2)                                                                                                                                   | A1_p50                | B1_p50       | -       |
| scaffold3.1  | CCG017363 | UPF0496 protein At4g34320-like                                                                        | Potri.009G112400                       | similar to expressed protein in <i>Arabidopsis<br/>thaliana</i> ; similar to At14a; similar to<br>GI:11994571 and GI:11994573 ( <i>Arabidopsis<br/>thaliana</i> ) | A1_p50                | B1_p50       | -       |
|              | CCG017364 | Probable 1-acyl-sn-glycerol-3-phosphate<br>acyltransferase 5                                          | Potri.009G112300                       | no                                                                                                                                                                | A1_p50                | B1_p50       | -       |
|              | CCG017365 | Phospholipase A-2-activating protein                                                                  | Potri.009G112100                       | no                                                                                                                                                                | A1_p50                | B1_p50       | -       |
|              | CCG017366 | Receptor-like protein 12 isoform X3                                                                   | Potri.009G112000                       | Similar to Cf-4/9 disease resistance-like protein                                                                                                                 | A1_p50                | B1_p50       | -       |
| scaffold18.1 | CCG008613 | phosphoenolpyruvate carboxylase kinase<br>1-like isoform X1                                           | Potri.008G166500                       | Calcium/calmodulin-dependent protein kinase I<br>(CAMK1)                                                                                                          | A1_p50                | B1_p50       | C1_p50  |
|              | CCG008614 | Serine/threonine protein phosphatase,<br>putative; K06269 protein phosphatase 1,<br>catalytic subunit | Potri.008G166300                       | Serine/threonine-protein phosphatase PP1<br>catalytic subunit (PPP1C)                                                                                             | A1_p50                | B1_p50       | C1_p50  |
|              | CCG008615 | Serine/threonine-protein phosphatase PP1<br>isozyme 3                                                 | no                                     | no                                                                                                                                                                | A1_p50                | B1_p50       | C1_p50  |
|              | CCG008616 | Ethylene-responsive transcription factor 1                                                            | Potri.008G166200                       | Ethylene-responsive transcription factor 1                                                                                                                        | A1_p50                | B1_p50       | C1_p50  |
| scaffold19.1 | CCG009563 | no                                                                                                    | Potri.006G244300                       | Similar to 2-on-2 hemoglobin (GLB3); similar<br>to the "truncated Hbs of bacteria; similar to<br>protozoa and fungi                                               | A1_p50                | B1_p50       | -       |
|              | CCG009564 | Serine/threonine-protein kinase AFC3                                                                  | Potri.006G244400                       | PTHR24058:SF44 - Serine/threonine-protein<br>kinase AFC1                                                                                                          | A1_p50                | B1_p50       | -       |

|               |           |                                                                                                                                                                                     |                  |                                                                                                                                                                  |        |        |        |
|---------------|-----------|-------------------------------------------------------------------------------------------------------------------------------------------------------------------------------------|------------------|------------------------------------------------------------------------------------------------------------------------------------------------------------------|--------|--------|--------|
|               | CCG009565 | Putative pentatricopeptide repeat-containing protein                                                                                                                                | Potri.006G244500 | Similar to pentatricopeptide (PPR) repeat-containing protein                                                                                                     | A1_p50 | B1_p50 | -      |
|               | CCG009566 | no                                                                                                                                                                                  | Potri.006G244700 | PTHR32212:SF126 - EMB                                                                                                                                            | A1_p50 | B1_p50 | -      |
|               | CCG009567 | RPM1 (RESISTANCE TO P. SYRINGAE PV MACULICOLA 1); nucleotide binding / protein binding; K13457 disease resistance protein RPM1                                                      | Potri.T143000    | Disease resistance protein RPM1 (RPM1, RPS3)                                                                                                                     | A1_p50 | B1_p50 | -      |
|               | CCG009568 | no                                                                                                                                                                                  | Potri.006G244900 | Similar to expressed protein in Arabidopsis thaliana                                                                                                             | A1_p50 | B1_p50 | -      |
| scaffold68.1  | CCG029245 | AT-rich interactive domain-containing protein                                                                                                                                       | Potri.002G003700 | PTHR15348:SF6 - At-rich interactive domain-containing protein 5-related                                                                                          | A1_p50 | -      | -      |
|               | CCG029246 | AT-hook motif nuclear-localized protein                                                                                                                                             | Potri.002G003800 | PTHR31100:SF5 - At-hook motif nuclear localized protein 29-related                                                                                               | A1_p50 | -      | -      |
|               | CCG029247 | hypothetical protein; K00021 hydroxymethylglutaryl-CoA reductase (NADPH)                                                                                                            | Potri.002G004000 | Similar to hydroxymethylglutaryl-CoA reductase                                                                                                                   | A1_p50 | -      | -      |
|               | CCG029248 | Cinnamoyl-CoA reductase                                                                                                                                                             | Potri.002G004100 | Similar to cinnamoyl-CoA reductase family                                                                                                                        | A1_p50 | -      | -      |
|               | CCG029249 | Cinnamoyl-CoA reductase                                                                                                                                                             | Potri.002G004500 | PTHR10366:SF461 - Cinnamoyl-CoA: Nadp Oxidoreductase-Like 1-Related                                                                                              | A1_p50 | -      | -      |
|               | CCG029250 | no                                                                                                                                                                                  | no               | no                                                                                                                                                               | A1_p50 | -      | -      |
| scaffold158.1 | CCG006869 | Phosphoglycerate mutase-like protein AT74                                                                                                                                           | Potri.005G037900 | PTHR23029:SF46 - Phosphoglycerate mutase family protein                                                                                                          | A1_p50 | B1_p50 | C1_p50 |
|               | CCG006870 | hypothetical protein; K00799 glutathione S-transferase 58                                                                                                                           | Potri.005G037800 | PTHR11260//PTHR11260:SF230 - glutathione S-Transferase U58, GSTU58                                                                                               | A1_p50 | B1_p50 | C1_p50 |
|               | CCG006871 | no                                                                                                                                                                                  | Potri.005G037700 | KOG1893 - Uncharacterized conserved protein                                                                                                                      | A1_p50 | B1_p50 | C1_p50 |
|               | CCG008730 | no                                                                                                                                                                                  | Potri.002G069400 | KOG4473 - Uncharacterized membrane protein                                                                                                                       | A1_p50 | B1_p50 | C1_p50 |
| scaffold181.1 | CCG008731 | no                                                                                                                                                                                  | Potri.002G069100 | Similar to ubiquitin interaction motif-containing protein                                                                                                        | A1_p50 | B1_p50 | C1_p50 |
|               | CCG008732 | Fructose-bisphosphatase; K03841 fructose-1,6-bisphosphatase I                                                                                                                       | Potri.005G191400 | Similar to fructose-1; similar to 6-bisphosphatase; putative; similar to D-fructose-1; similar to 6-bisphosphate 1-phosphohydrolase; putative; similar to FBPase | A1_p50 | B1_p50 | C1_p50 |
|               | CCG008733 | Exocyst complex component SEC5B-like                                                                                                                                                | Potri.002G068900 | Similar to exocyst complex component SEC5                                                                                                                        | A1_p50 | B1_p50 | C1_p50 |
| scaffold292.1 | CCG016764 | no                                                                                                                                                                                  | no               | no                                                                                                                                                               | A1_p50 | B1_p50 | C1_p50 |
|               | CCG016765 | CRK; CRK (CDPK-related kinase); ATP binding / calcium ion binding / calcium-dependent protein serine/threonine phosphatase/ kinase/ protein kinase/ protein serine/threonine kinase | Potri.004G143700 | PTHR24349//PTHR24349:SF115 - Serine/Threonine-protein kinase                                                                                                     | A1_p50 | B1_p50 | C1_p50 |
|               | CCG016766 | Basic 7S globulin-like                                                                                                                                                              | Potri.019G065000 | PTHR13683:SF268 - Eukaryotic Aspartyl Protease family protein                                                                                                    | A1_p50 | B1_p50 | C1_p50 |
|               | CCG016767 | DEAD-box RNA helicase 57 (DBRH57)                                                                                                                                                   | Potri.019G065300 | Similar to DEAD/DEAH box helicase; similar to RNA helicase involved in rRNA processing                                                                           | A1_p50 | B1_p50 | C1_p50 |



|               |           |                                                                                                          |                  |                                                                                                                                                                                                                             |              |              |              |
|---------------|-----------|----------------------------------------------------------------------------------------------------------|------------------|-----------------------------------------------------------------------------------------------------------------------------------------------------------------------------------------------------------------------------|--------------|--------------|--------------|
|               |           |                                                                                                          |                  | GB:6321267 from ( <i>Saccharomyces cerevisiae</i> ); similar to contains DEAD and DEAH box domain                                                                                                                           |              |              |              |
|               | CCG018134 | no                                                                                                       | Potri.013G092900 | no                                                                                                                                                                                                                          | A1_p50       | -            | -            |
|               | CCG018135 | no                                                                                                       | Potri.019G065500 | PTHR32246:SF15 - Calcium-dependent lipid-binding (Calb Domain) Family Protein                                                                                                                                               | A1_p50       | -            | -            |
|               | CCG018136 | Acetyltransferase NSI                                                                                    | Potri.019G065400 | PTHR13355:SF12 - GCN5-Related N-Acetyltransferase (GNAT) family protein                                                                                                                                                     | A1_p50       | -            | -            |
| scaffold309.1 | CCG018137 | Ddx52, Rok1; DEAD (Asp-Glu-Ala-Asp) box polypeptide 52; K01529                                           | Potri.019G065300 | similar to DEAD/DEAH box helicase; putative; similar to RNA helicase involved in rRNA processing GB:6321267 from ( <i>Saccharomyces cerevisiae</i> ); similar to contains DEAD and DEAH box domain                          | A1_p50       | -            | -            |
|               | CCG018138 | Aspartyl protease family protein; K00924                                                                 | Potri.019G065000 | PTHR13683:SF268 - Eukaryotic aspartyl protease family protein                                                                                                                                                               | A1_p50       | -            | -            |
|               | CCG022378 | hypothetical protein; K00287 dihydrofolate reductase                                                     | Potri.015G125100 | similar to cytochrome b5 domain-containing protein; similar to SP O00264 Membrane associated progesterone receptor component mPR ({Homo} {sapiens} ); similar to putative progesterone-binding protein homolog (Atmp2) mRNA | A1_p50       | -            | -            |
|               | CCG022379 | Ankyrin repeat-containing protein                                                                        | Potri.015G125000 | PTHR24177:SF42 - Ankyrin repeat family protein                                                                                                                                                                              | A1_p50       | -            | -            |
| scaffold413.1 | CCG022380 | GD11060 gene product from transcript GD11060-RA; K02366 glucuronyl/N-acetylglucosaminyl transferase EXT1 | Potri.015G124800 | PTHR11062//PTHR11062:SF50 - Exostosin heparan sulfate glycosyltransferase -related                                                                                                                                          | A1_p50       | -            | -            |
|               | CCG022381 | Histidine triad nucleotide binding protein 1 (HINT1)                                                     | Potri.015G124700 | similar to zinc-binding protein; similar to protein kinase C inhibitor; similar to 14 kDa zinc-binding protein (Protein kinase C inhibitor; similar to PKCI) ( <i>Zea mays</i> )                                            | A1_p50       | -            | -            |
|               | CCG022382 | hypothetical protein; K05750 NCK-associated protein 1                                                    | Potri.012G124400 | K05750 - NCK-associated protein 1 (NCKAP1, NAP125)                                                                                                                                                                          | A1_p50       | -            | -            |
|               | CCG007865 | CLH2; ATCLH2; chlorophyllase; K08099 chlorophyllase                                                      | Potri.010G082300 | similar to Chlorophyllase 1 (AtCLH1) (Chlorophyll-chlorophyllido hydrolase 1) (Chlase 1) (Coronatine-induced protein 1) (COR11)                                                                                             | -            | -            | C1_p50       |
| scaffold17.1  | CCG007866 | no                                                                                                       | Potri.010G082400 | Similar to expressed protein in <i>Arabidopsis thaliana</i>                                                                                                                                                                 | -            | -            | C1_p50       |
|               | CCG007867 | no                                                                                                       | Potri.010G082500 | Similar to expressed protein in <i>Arabidopsis thaliana</i>                                                                                                                                                                 | -            | -            | C1_p50       |
|               | CCG026588 | no                                                                                                       | Potri.013G119200 | no                                                                                                                                                                                                                          | A2_p100-p150 | B2_p100-p150 | C2_p100-p150 |
| scaffold55.1  | CCG026589 | no                                                                                                       | Potri.013G119300 | no                                                                                                                                                                                                                          | A2_p100-p150 | B2_p100-p150 | C2_p100-p150 |
|               | CCG026590 | Transcription factor TCP4-like                                                                           | Potri.013G119400 | PF03634 - TCP family transcription factor                                                                                                                                                                                   | A2_p100-p150 | B2_p100-p150 | C2_p100-p150 |
| scaffold22.1  | CCG012660 | helB1; DEAD/DEAH box helicase;                                                                           | Potri.010G234000 | Similar to expressed protein in <i>Arabidopsis</i>                                                                                                                                                                          | A3_p150-p200 | B3_p150-p200 | C3_p100-p200 |

|               | K12811 ATP-dependent RNA helicase<br>DDX46/PRP5 |                                                                                                  | <i>thaliana</i>  |                                                                                                                                         |              |                           |
|---------------|-------------------------------------------------|--------------------------------------------------------------------------------------------------|------------------|-----------------------------------------------------------------------------------------------------------------------------------------|--------------|---------------------------|
|               | CCG012661                                       | no                                                                                               | Potri.010G233900 | PTHR22950//PTHR22950:SF287 - Amino acid transporter                                                                                     | A3_p150-p200 | B3_p150-p200 C3_p100-p200 |
|               | CCG012662                                       | no                                                                                               | Potri.010G233700 | PF11961 - Domain of unknown function (DUF3475) (DUF3475)                                                                                | A3_p150-p200 | B3_p150-p200 C3_p100-p200 |
|               | CCG012663                                       | Phosphatidylinositol-3-phosphatase myotubularin-1                                                | Potri.010G233600 | Phosphatidylinositol-3-phosphatase / Phosphatidyl-3-phosphate 3-phosphohydrolase                                                        | A3_p150-p200 | B3_p150-p200 C3_p100-p200 |
| scaffold277.1 | CCG015943                                       | ATP-dependent Clp protease proteolytic subunit 3, chloroplastic                                  | Potri.004G092100 | no                                                                                                                                      | A4_p200-p250 | B4_p200-p250 -            |
|               | CCG015944                                       | ELL-associated factor 2-like                                                                     | Potri.004G092200 | K15186 - ELL-associated factor (EAF)                                                                                                    | A4_p200-p250 | B4_p200-p250 -            |
|               | CCG015945                                       | Probable carboxylesterase 18                                                                     | Potri.004G092500 | PTHR23024//PTHR23024:SF174 - Member of 'GDXXG' family of lipolytic enzymes                                                              | A4_p200-p250 | B4_p200-p250 -            |
|               | CCG015946                                       | no                                                                                               | no               | no                                                                                                                                      | A4_p200-p250 | B4_p200-p250 -            |
| scaffold696.1 | CCG029558                                       | N-lysine methyltransferase setd6-like                                                            | Potri.004G135700 | PTHR13271//PTHR13271:SF30 - Uncharacterized putative methyltransferase                                                                  | A4_p200-p250 | B4_p200-p250 C3_p100-p200 |
|               | CCG029559                                       | no                                                                                               | Potri.004G135800 | Uncharacterized conserved protein                                                                                                       | A4_p200-p250 | B4_p200-p250 C3_p100-p200 |
|               | CCG029560                                       | no                                                                                               | Potri.004G136300 | no                                                                                                                                      | A4_p200-p250 | B4_p200-p250 C3_p100-p200 |
| scaffold72.1  | CCG030115                                       | Polyamine oxidase 3; polyamine oxidase; K13367 non-specific polyamine oxidase                    | Potri.T060000    | no                                                                                                                                      | A5_p250      | - -                       |
|               | CCG030116                                       | no                                                                                               | Potri.T059600    | no                                                                                                                                      | A5_p250      | - -                       |
| scaffold12.1  | CCG003399                                       | eukaryotic translation elongation factor, putative; K03234 elongation factor EF-2                | Potri.005G098100 | Similar to elongation factor 2 (EF-2); similar to encodes a translation EF-2-like protein that is involved in cold-induced translation. | -            | - C4_p250                 |
|               | CCG003400                                       | NAC domain-containing protein 21/22                                                              | Potri.005G098200 | PTHR31744:SF5 - NAC domain-containing protein 21/22-related                                                                             | -            | - C4_p250                 |
|               | CCG003401                                       | no                                                                                               | Potri.005G098300 | Similar to expressed protein in <i>Arabidopsis thaliana</i>                                                                             | -            | - C4_p250                 |
|               | CCG003402                                       | no                                                                                               | Potri.005G098400 | no                                                                                                                                      | -            | - C4_p250                 |
|               | CCG003403                                       | RNA polymerase I-specific transcription initiation factor RRN3                                   | Potri.005G098500 | RNA polymerase 1 specific transcription initiation factor RRN3 family protein                                                           | -            | - C4_p250                 |
| scaffold219.1 | CCG012411                                       | L-ascorbate oxidase, putative; K00423 L-ascorbate oxidase                                        | Potri.019G088600 | PTHR11709//PTHR11709:SF118 - Multi-copper oxidase                                                                                       | -            | - C4_p250                 |
|               | CCG012412                                       | no                                                                                               | Potri.019G089000 | PTHR12565//PTHR12565:SF82 - Sterol regulatory element-binding protein                                                                   | -            | - C4_p250                 |
|               | CCG012413                                       | no                                                                                               | Potri.019G089200 | no                                                                                                                                      | -            | - C4_p250                 |
|               | CCG012414                                       | ketol-acid reductoisomerase, chloroplast precursor, putative; K00053 ketol-acid reductoisomerase | Potri.019G089100 | Ketol-acid reductoisomerase (NADP(+)) / Dihydroxyisovalerate dehydrogenase (isomerizing)                                                | -            | - C4_p250                 |
|               | CCG012415                                       | no                                                                                               | no               | no                                                                                                                                      | -            | - C4_p250                 |
